# Supplementary material for: The glass assemblage from San Pietro in Castello: tracing glass technology and innovations in the Venetian lagoon
Source: Springer Nature journal article supplement (doi:10.1007/s12520-025-02317-0), 2025-10-24
Supplement: MOESM1 [file 12520_2025_2317_MOESM1_ESM.pdf]

## SUPPLEMENTARY MATERIALS

Gliozzo, E., Ferri, M., Braschi, E. 2025. The glass assemblage from San Pietro in castello: tracing glass technology and innovations in the Venetian lagoon. *Archaeological and Anthropological Sciences*. DOI: 10.1007/s12520-025-02317-0

---

Figure S1. The compositional bands in samples SPC 18 (A), 21 (B), 23 (C-D), 24 (E) and 38 (F).

Table S1. Results obtained by EMPA. Dark bands (D) and light bands (L) as well as green (G) and red (R) areas in SPC21 are indicated. Average data of “n=” measurements are expressed as wt% [sd=standard deviation].

Table S2. The results achieved by LA-ICP-MS on the glass collection from San Pietro in Castello. All values are provided as ppm. [n=number of measurements; sd=standard deviation].

Table S3. EMPA full dataset. All values in wt%.

Table S4. LA-ICP-MS: full data set. All values in ppm.

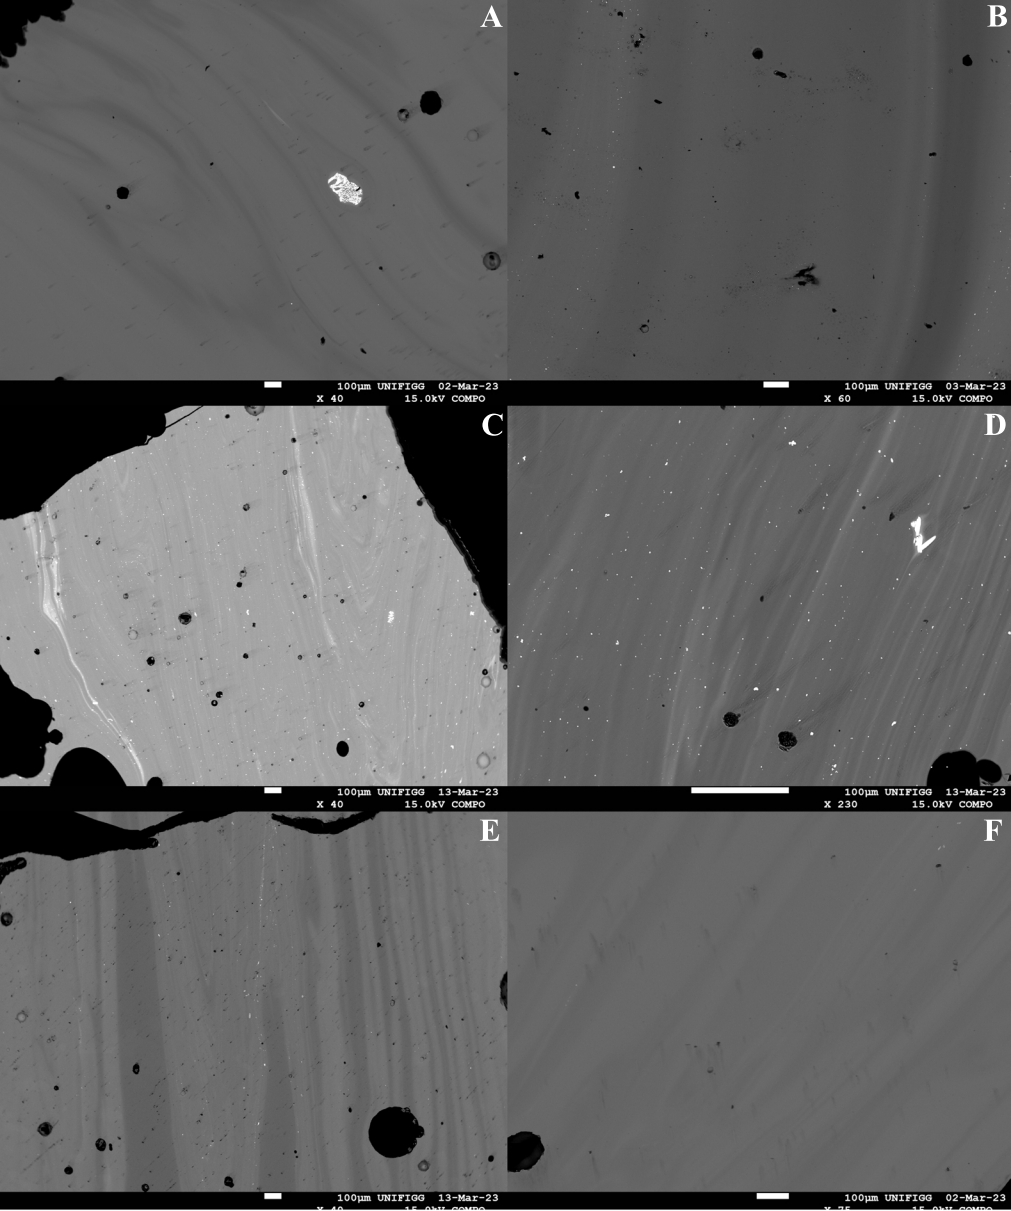

Figure S1. The compositional bands in samples SPC 18 (A), 21 (B), 23 (C-D), 24 (E) and 38/F (F).

Table S1. Results obtained by EMPA. Dark bands (D) and light bands (L) as well as green (G) and red (R) areas in SPC21 are indicated. Average data of “n=” measurements are expressed as wt% [sd=standard deviation].

|                 | SiO <sub>2</sub> | TiO <sub>2</sub> | Al <sub>2</sub> O <sub>3</sub> | FeO         | MnO         | MgO         | CaO         | Na <sub>2</sub> O | K <sub>2</sub> O | P <sub>2</sub> O <sub>5</sub> | Cl          | SO <sub>3</sub> | CoO | CuO         | SnO <sub>2</sub> | Sb <sub>2</sub> O <sub>5</sub> | PbO         | Total        |
|-----------------|------------------|------------------|--------------------------------|-------------|-------------|-------------|-------------|-------------------|------------------|-------------------------------|-------------|-----------------|-----|-------------|------------------|--------------------------------|-------------|--------------|
| SPC1            | 68.20            | 0.14             | 2.42                           | 0.90        | 1.30        | 0.95        | 7.39        | 16.63             | 0.60             | 0.11                          | 0.83        | 0.38            | -   | -           | -                | -                              | -           | 99.85        |
| n=6             | 0.41             | 0.03             | 0.08                           | 0.06        | 0.11        | 0.05        | 0.23        | 0.24              | 0.05             | 0.01                          | 0.07        | 0.02            | -   | -           | -                | -                              | -           |              |
| SPC2            | 65.34            | 0.16             | 2.44                           | 0.85        | 1.66        | 1.09        | 7.89        | 18.10             | 0.63             | 0.12                          | 0.93        | 0.36            | -   | -           | -                | -                              | -           | 99.56        |
| n=6             | 0.16             | 0.02             | 0.02                           | 0.04        | 0.04        | 0.04        | 0.08        | 0.09              | 0.04             | 0.02                          | 0.02        | 0.01            | -   | -           | -                | -                              | -           |              |
| SPC3            | 67.17            | 0.15             | 2.43                           | 0.77        | 1.20        | 0.94        | 8.16        | 16.94             | 0.61             | 0.10                          | 0.85        | 0.41            | -   | -           | -                | -                              | -           | 99.79        |
| n=7             | 0.15             | 0.04             | 0.06                           | 0.04        | 0.03        | 0.04        | 0.22        | 0.19              | 0.03             | 0.02                          | 0.04        | 0.01            | -   | -           | -                | -                              | -           |              |
| SPC4            | 64.20            | 0.15             | 2.36                           | 0.80        | 1.12        | 1.01        | 6.98        | 19.81             | 0.59             | 0.25                          | 1.07        | 0.48            | -   | 0.20        | 0.33             | -                              | 0.73        | 100.07       |
| n=6             | 0.21             | 0.02             | 0.07                           | 0.05        | 0.05        | 0.03        | 0.19        | 0.12              | 0.04             | 0.04                          | 0.02        | 0.01            | -   | 0.02        | 0.05             | 0.01                           | 0.05        |              |
| SPC5            | 64.21            | 0.17             | 2.74                           | 2.19        | 1.35        | 1.34        | 7.02        | 18.16             | 0.92             | 0.24                          | 0.85        | 0.41            | -   | -           | -                | -                              | 0.05        | 99.64        |
| n=6             | 0.23             | 0.04             | 0.05                           | 0.06        | 0.04        | 0.01        | 0.09        | 0.20              | 0.04             | 0.04                          | 0.02        | 0.02            | -   | 0.01        | -                | 0.02                           | 0.01        |              |
| SPC6            | 64.01            | 0.14             | 2.35                           | 0.85        | 1.38        | 1.11        | 7.74        | 20.16             | 0.61             | 0.12                          | 0.86        | 0.43            | -   | 0.01        | -                | 0.03                           | 0.01        | 99.79        |
| n=7             | 0.35             | 0.02             | 0.06                           | 0.04        | 0.02        | 0.01        | 0.13        | 0.19              | 0.03             | 0.03                          | 0.15        | 0.06            | -   | 0.01        | -                | 0.01                           | 0.03        |              |
| SPC7            | 69.22            | 0.06             | 2.86                           | 0.42        | 0.03        | 0.75        | 8.40        | 16.12             | 0.73             | 0.13                          | 0.93        | 0.20            | -   | -           | -                | -                              | -           | 99.85        |
| n=7             | 0.40             | 0.03             | 0.12                           | 0.03        | 0.01        | 0.08        | 0.25        | 0.17              | 0.03             | 0.04                          | 0.03        | 0.03            | -   | -           | -                | -                              | -           |              |
| SPC8            | 64.80            | 0.15             | 2.70                           | 1.43        | 1.55        | 1.25        | 7.37        | 18.18             | 0.87             | 0.21                          | 0.81        | 0.40            | -   | -           | -                | -                              | 0.07        | 99.79        |
| n=8             | 0.15             | 0.02             | 0.04                           | 0.19        | 0.05        | 0.03        | 0.12        | 0.21              | 0.04             | 0.03                          | 0.03        | 0.02            | -   | 0.01        | 0.01             | 0.01                           | 0.02        |              |
| SPC9            | 67.08            | 0.16             | 2.60                           | 0.86        | 0.76        | 0.86        | 6.65        | 18.09             | 0.63             | 0.15                          | 1.00        | 0.30            | -   | 0.12        | -                | 0.20                           | 0.20        | 99.66        |
| n=11            | 0.52             | 0.05             | 0.12                           | 0.11        | 0.04        | 0.07        | 0.47        | 0.30              | 0.05             | 0.07                          | 0.20        | 0.02            | -   | 0.04        | 0.02             | 0.04                           | 0.03        |              |
| SPC10           | 70.67            | 0.06             | 2.98                           | 0.36        | 0.02        | 0.62        | 7.06        | 16.30             | 0.56             | 0.05                          | 0.96        | 0.17            | -   | -           | -                | -                              | -           | 99.81        |
| n=7             | 0.15             | 0.04             | 0.06                           | 0.03        | 0.01        | 0.03        | 0.07        | 0.10              | 0.01             | 0.02                          | 0.02        | 0.01            | -   | -           | -                | -                              | -           |              |
| SPC11           | 67.59            | 0.10             | 2.89                           | 0.71        | 0.18        | 0.89        | 8.51        | 16.71             | 0.66             | 0.14                          | 0.78        | 0.18            | -   | 0.11        | 0.04             | 0.11                           | 0.30        | 99.90        |
| n=7             | 0.23             | 0.03             | 0.05                           | 0.04        | 0.01        | 0.04        | 0.08        | 0.20              | 0.02             | 0.03                          | 0.02        | 0.02            | -   | 0.02        | 0.01             | 0.01                           | 0.03        |              |
| SPC12           | 71.00            | 0.07             | 2.95                           | 0.38        | 0.02        | 0.62        | 6.82        | 16.26             | 0.53             | 0.05                          | 0.96        | 0.17            | -   | -           | -                | -                              | -           | 99.84        |
| n=8             | 0.17             | 0.02             | 0.04                           | 0.03        | 0.01        | 0.02        | 0.11        | 0.14              | 0.02             | 0.03                          | 0.03        | 0.01            | -   | -           | -                | -                              | -           |              |
| SPC13           | 65.92            | 0.15             | 1.56                           | 0.71        | 0.13        | 2.31        | 8.45        | 16.86             | 1.90             | 0.58                          | 0.80        | 0.25            | -   | -           | -                | -                              | -           | 99.60        |
| n=8             | 0.33             | 0.02             | 0.05                           | 0.04        | 0.02        | 0.07        | 0.14        | 0.21              | 0.04             | 0.05                          | 0.02        | 0.03            | -   | -           | -                | -                              | -           |              |
| SPC14           | 71.55            | 0.07             | 2.89                           | 0.36        | 0.02        | 0.63        | 6.52        | 15.97             | 0.54             | 0.06                          | 0.97        | 0.16            | -   | -           | -                | -                              | -           | 99.74        |
| n=7             | 0.22             | 0.03             | 0.03                           | 0.03        | 0.01        | 0.03        | 0.14        | 0.14              | 0.03             | 0.02                          | 0.02        | 0.02            | -   | -           | -                | -                              | -           |              |
| SPC16           | 72.72            | 0.09             | 3.17                           | 0.48        | 0.03        | 0.59        | 6.61        | 14.46             | 0.61             | 0.07                          | 0.91        | 0.09            | -   | -           | -                | -                              | -           | 99.83        |
| n=9             | 0.62             | 0.02             | 0.11                           | 0.08        | 0.01        | 0.19        | 0.13        | 0.25              | 0.05             | 0.02                          | 0.05        | 0.02            | -   | -           | -                | -                              | -           |              |
| SPC17           | 68.85            | 0.09             | 2.82                           | 0.65        | 0.22        | 0.96        | 7.99        | 15.95             | 0.78             | 0.15                          | 0.86        | 0.24            | -   | 0.05        | -                | -                              | 0.16        | 99.76        |
| n=10            | 0.16             | 0.02             | 0.06                           | 0.05        | 0.02        | 0.07        | 0.14        | 0.11              | 0.04             | 0.02                          | 0.03        | 0.02            | -   | 0.02        | -                | -                              | 0.04        |              |
| SPC18D          | 67.62            | 0.07             | 2.93                           | 0.56        | 0.23        | 0.88        | 8.24        | 16.19             | 0.65             | 0.10                          | 0.83        | 0.18            | -   | 0.28        | 0.03             | 0.10                           | 0.70        | 99.57        |
| n=4             | 0.35             | 0.02             | 0.02                           | 0.04        | 0.04        | 0.04        | 0.20        | 0.23              | 0.07             | 0.04                          | 0.04        | 0.01            | -   | 0.03        | 0.03             | 0.02                           | 0.09        |              |
| SPC18L          | 65.64            | 0.09             | 2.72                           | 0.85        | 0.45        | 0.90        | 8.20        | 15.95             | 0.62             | 0.14                          | 0.87        | 0.25            | -   | 0.27        | 0.36             | 0.09                           | 2.04        | 99.46        |
| n=8             | 0.81             | 0.02             | 0.07                           | 0.09        | 0.05        | 0.04        | 0.26        | 0.14              | 0.05             | 0.03                          | 0.04        | 0.03            | -   | 0.04        | 0.08             | 0.01                           | 0.19        |              |
| <i>SPC18tot</i> | <i>66.63</i>     | <i>0.08</i>      | <i>2.83</i>                    | <i>0.71</i> | <i>0.34</i> | <i>0.89</i> | <i>8.22</i> | <i>16.07</i>      | <i>0.63</i>      | <i>0.12</i>                   | <i>0.85</i> | <i>0.21</i>     | -   | <i>0.28</i> | <i>0.19</i>      | <i>0.10</i>                    | <i>1.37</i> | <i>99.52</i> |
| <i>n=12</i>     | <i>1.40</i>      | <i>0.02</i>      | <i>0.15</i>                    | <i>0.21</i> | <i>0.15</i> | <i>0.02</i> | <i>0.03</i> | <i>0.16</i>       | <i>0.03</i>      | <i>0.03</i>                   | <i>0.03</i> | <i>0.05</i>     | -   | <i>0.01</i> | <i>0.24</i>      | <i>0.01</i>                    | <i>0.95</i> |              |
| SPC19           | 65.91            | 0.07             | 2.79                           | 0.37        | 0.02        | 1.03        | 10.33       | 17.39             | 0.84             | 0.05                          | 0.75        | 0.16            | -   | -           | -                | -                              | -           | 99.71        |
| n=6             | 0.19             | 0.05             | 0.06                           | 0.03        | 0.01        | 0.04        | 0.13        | 0.12              | 0.09             | 0.02                          | 0.03        | 0.01            | -   | -           | -                | -                              | -           |              |
| SPC20           | 68.96            | 0.04             | 3.18                           | 0.36        | 0.01        | 1.05        | 9.58        | 13.22             | 1.84             | 0.05                          | 0.90        | 0.10            | -   | -           | -                | -                              | -           | 99.30        |
| n=6             | 0.12             | 0.04             | 0.07                           | 0.05        | 0.01        | 0.04        | 0.13        | 0.29              | 0.34             | 0.02                          | 0.03        | 0.01            | -   | -           | -                | -                              | -           |              |
| SPC21G          | 65.06            | 0.16             | 2.63                           | 1.99        | 0.73        | 1.71        | 6.86        | 16.68             | 0.81             | 0.19                          | 0.82        | 0.30            | -   | 0.42        | 0.15             | 0.30                           | 0.80        | 99.59        |
| n=8             | 1.17             | 0.04             | 0.09                           | 1.09        | 0.03        | 0.40        | 0.71        | 0.35              | 0.06             | 0.02                          | 0.10        | 0.03            | -   | 0.05        | 0.01             | 0.04                           | 0.17        |              |
| SPC21R          | 62.62            | 0.15             | 2.73                           | 3.95        | 0.70        | 2.25        | 6.57        | 16.14             | 0.76             | 0.21                          | 0.83        | 0.25            | -   | 0.47        | 0.19             | 0.30                           | 1.42        | 99.54        |
| n=11            | 0.66             | 0.04             | 0.09                           | 0.81        | 0.03        | 0.31        | 0.14        | 0.40              | 0.03             | 0.03                          | 0.03        | 0.05            | -   | 0.15        | 0.04             | 0.03                           | 0.15        |              |

|            | SiO <sub>2</sub> | TiO <sub>2</sub> | Al <sub>2</sub> O <sub>3</sub> | FeO  | MnO  | MgO  | CaO   | Na <sub>2</sub> O | K <sub>2</sub> O | P <sub>2</sub> O <sub>5</sub> | Cl   | SO <sub>3</sub> | CoO  | CuO  | SnO <sub>2</sub> | Sb <sub>2</sub> O <sub>5</sub> | PbO  | Total  |
|------------|------------------|------------------|--------------------------------|------|------|------|-------|-------------------|------------------|-------------------------------|------|-----------------|------|------|------------------|--------------------------------|------|--------|
| SPC21tot   | 63.84            | 0.15             | 2.68                           | 2.97 | 0.71 | 1.98 | 6.71  | 16.41             | 0.78             | 0.20                          | 0.82 | 0.27            | -    | 0.45 | 0.17             | 0.30                           | 1.11 | 99.57  |
| n=19       | 1.72             | 0.01             | 0.07                           | 1.38 | 0.02 | 0.39 | 0.20  | 0.38              | 0.04             | 0.02                          | 0.01 | 0.04            | -    | 0.04 | 0.03             | -                              | 0.44 |        |
| SPC22blue  | 62.18            | 0.32             | 2.94                           | 2.84 | 1.60 | 1.24 | 5.09  | 18.98             | 0.39             | 0.05                          | 1.18 | 0.32            | 0.16 | 0.80 | -                | -                              | 1.45 | 99.56  |
| n=7        | 0.22             | 0.04             | 0.03                           | 0.05 | 0.05 | 0.03 | 0.11  | 0.15              | 0.02             | 0.01                          | 0.03 | 0.02            | 0.01 | 0.08 | -                | -                              | 0.22 |        |
| SPC22green | 65.30            | 0.38             | 2.87                           | 1.21 | 1.56 | 1.24 | 4.78  | 20.46             | 0.35             | 0.05                          | 1.36 | 0.33            | -    | -    | -                | -                              | -    | 99.88  |
| n=9        | 0.17             | 0.03             | 0.05                           | 0.05 | 0.05 | 0.06 | 0.09  | 0.15              | 0.02             | 0.01                          | 0.02 | 0.02            | -    | -    | -                | -                              | -    |        |
| SPC23D     | 67.88            | 0.09             | 2.11                           | 0.80 | 0.45 | 0.54 | 5.89  | 18.12             | 0.50             | 0.08                          | 1.09 | 0.36            | 0.05 | 0.14 | -                | 1.16                           | 0.34 | 99.61  |
| n=10       | 0.98             | 0.05             | 0.13                           | 0.10 | 0.03 | 0.04 | 0.26  | 0.35              | 0.04             | 0.02                          | 0.05 | 0.03            | 0.02 | 0.03 | -                | 0.21                           | 0.07 |        |
| SPC23L     | 67.63            | 0.04             | 2.41                           | 0.98 | 0.68 | 0.54 | 6.07  | 16.99             | 0.52             | 0.19                          | 0.78 | 0.46            | 0.14 | 0.13 | -                | 1.32                           | 0.52 | 99.41  |
| n=6        | 0.54             | 0.03             | 0.14                           | 0.10 | 0.20 | 0.06 | 0.50  | 0.57              | 0.04             | 0.03                          | 0.11 | 0.05            | 0.05 | 0.02 | -                | 0.22                           | 0.28 |        |
| SPC23tot   | 67.75            | 0.06             | 2.26                           | 0.89 | 0.57 | 0.54 | 5.98  | 17.55             | 0.51             | 0.14                          | 0.94 | 0.41            | 0.10 | 0.14 | -                | 1.24                           | 0.43 | 99.51  |
| n=16       | 0.17             | 0.04             | 0.21                           | 0.13 | 0.16 | -    | 0.13  | 0.80              | 0.01             | 0.08                          | 0.22 | 0.07            | 0.06 | 0.01 | -                | 0.11                           | 0.13 |        |
| SPC24D     | 70.74            | 0.06             | 2.71                           | 0.35 | 0.05 | 0.56 | 7.07  | 15.91             | 0.57             | 0.15                          | 1.09 | 0.18            | -    | 0.14 | 0.04             | 0.05                           | 0.02 | 99.69  |
| n=6        | 0.61             | 0.01             | 0.10                           | 0.07 | 0.03 | 0.05 | 0.34  | 0.26              | 0.04             | 0.03                          | 0.03 | 0.02            | -    | 0.07 | 0.02             | 0.02                           | 0.03 |        |
| SPC24L     | 68.59            | 0.05             | 2.47                           | 0.36 | 0.14 | 0.54 | 6.73  | 16.05             | 0.53             | 0.13                          | 1.02 | 0.20            | -    | 1.27 | 0.11             | 0.48                           | 0.77 | 99.45  |
| n=9        | 0.88             | 0.02             | 0.36                           | 0.05 | 0.17 | 0.05 | 0.55  | 2.01              | 0.09             | 0.02                          | 0.08 | 0.04            | -    | 0.17 | 0.02             | 0.11                           | 0.41 |        |
| SPC24tot   | 69.67            | 0.06             | 2.59                           | 0.36 | 0.10 | 0.55 | 6.90  | 15.98             | 0.55             | 0.14                          | 1.06 | 0.19            | -    | 0.70 | 0.08             | 0.26                           | 0.40 | 99.80  |
| n=15       | 1.52             | 0.01             | 0.17                           | 0.01 | 0.06 | 0.02 | 0.24  | 0.10              | 0.03             | 0.01                          | 0.05 | 0.01            | -    | 0.80 | 0.04             | 0.31                           | 0.53 |        |
| SPC25      | 64.57            | 0.12             | 2.39                           | 0.87 | 1.62 | 1.10 | 8.03  | 18.74             | 0.65             | 0.10                          | 0.97 | 0.38            | -    | -    | -                | -                              | -    | 99.54  |
| n=6        | 0.20             | 0.03             | 0.08                           | 0.06 | 0.07 | 0.01 | 0.13  | 0.26              | 0.04             | 0.02                          | 0.04 | 0.02            | -    | -    | -                | -                              | -    |        |
| SPC26      | 62.89            | 0.17             | 2.57                           | 1.00 | 1.78 | 1.30 | 7.97  | 19.79             | 0.65             | 0.12                          | 1.00 | 0.42            | -    | -    | -                | -                              | -    | 99.66  |
| n=7        | 0.47             | 0.02             | 0.05                           | 0.09 | 0.09 | 0.05 | 0.31  | 0.18              | 0.03             | 0.02                          | 0.03 | 0.02            | -    | -    | -                | -                              | -    |        |
| SPC27      | 70.35            | 0.07             | 3.11                           | 0.38 | 0.03 | 0.77 | 8.96  | 14.30             | 0.47             | 0.06                          | 0.91 | 0.11            | -    | -    | -                | -                              | 0.05 | 99.57  |
| n=9        | 0.21             | 0.04             | 0.03                           | 0.04 | 0.01 | 0.03 | 0.09  | 0.21              | 0.03             | 0.02                          | 0.02 | 0.01            | -    | -    | -                | -                              | 0.02 |        |
| SPC29      | 68.23            | 0.09             | 3.51                           | 0.80 | 0.07 | 1.79 | 9.33  | 13.99             | 0.71             | 0.23                          | 0.48 | 0.10            | -    | -    | -                | -                              | 0.04 | 99.38  |
| n=9        | 1.41             | 0.04             | 0.37                           | 0.26 | 0.01 | 0.61 | 0.43  | 0.21              | 0.03             | 0.20                          | 0.22 | 0.02            | -    | -    | -                | -                              | 0.02 |        |
| SPC31      | 63.72            | 0.17             | 2.80                           | 1.08 | 0.22 | 1.15 | 7.59  | 20.25             | 0.67             | 0.16                          | 1.00 | 0.52            | 0.03 | 0.11 | -                | 0.03                           | 0.29 | 99.78  |
| n=8        | 0.22             | 0.04             | 0.07                           | 0.05 | 0.02 | 0.05 | 0.06  | 0.22              | 0.02             | 0.01                          | 0.03 | 0.03            | 0.02 | 0.03 | -                | 0.01                           | 0.03 |        |
| SPC32      | 71.73            | 0.07             | 2.95                           | 0.34 | 0.02 | 0.62 | 6.46  | 16.19             | 0.53             | 0.05                          | 0.92 | 0.18            | -    | -    | -                | -                              | -    | 100.07 |
| n=8        | 0.09             | 0.04             | 0.03                           | 0.02 | 0.01 | 0.03 | 0.06  | 0.09              | 0.03             | 0.01                          | 0.02 | 0.01            | -    | -    | -                | -                              | -    |        |
| SPC33      | 64.22            | 0.15             | 2.49                           | 0.86 | 1.84 | 1.25 | 8.81  | 17.77             | 0.76             | 0.16                          | 0.81 | 0.45            | -    | -    | -                | -                              | -    | 99.59  |
| n=8        | 0.34             | 0.03             | 0.05                           | 0.05 | 0.05 | 0.04 | 0.12  | 0.29              | 0.03             | 0.02                          | 0.03 | 0.02            | -    | -    | -                | -                              | -    |        |
| SPC34      | 63.77            | 0.12             | 2.37                           | 0.83 | 1.12 | 1.00 | 6.97  | 19.84             | 0.62             | 0.24                          | 1.06 | 0.46            | -    | 0.19 | 0.30             | -                              | 0.86 | 99.75  |
| n=7        | 0.23             | 0.02             | 0.04                           | 0.06 | 0.04 | 0.02 | 0.07  | 0.12              | 0.01             | 0.04                          | 0.02 | 0.03            | -    | 0.03 | 0.07             | -                              | 0.08 |        |
| SPC35      | 71.19            | 0.04             | 2.63                           | 0.28 | 0.23 | 0.44 | 6.98  | 15.98             | 0.48             | 0.14                          | 1.19 | 0.16            | -    | -    | -                | 0.05                           | -    | 99.79  |
| n=8        | 0.16             | 0.03             | 0.04                           | 0.03 | 0.03 | 0.02 | 0.07  | 0.02              | 0.07             | 0.03                          | 0.04 | 0.01            | -    | -    | -                | 0.01                           | -    |        |
| SPC36      | 68.84            | 0.16             | 1.91                           | 0.63 | 0.01 | 0.49 | 8.24  | 17.95             | 0.30             | 0.10                          | 1.23 | 0.18            | -    | -    | -                | -                              | -    | 100.04 |
| n=8        | 0.19             | 0.03             | 0.02                           | 0.04 | 0.01 | 0.03 | 0.09  | 0.11              | 0.03             | 0.02                          | 0.03 | 0.02            | -    | -    | -                | -                              | -    |        |
| SPC37      | 67.05            | 0.07             | 1.32                           | 0.63 | 0.30 | 3.37 | 10.14 | 12.13             | 2.66             | 0.36                          | 0.85 | 0.17            | -    | 0.21 | -                | -                              | 0.04 | 99.30  |
| n=10       | 0.19             | 0.03             | 0.16                           | 0.03 | 0.02 | 0.06 | 0.11  | 0.15              | 0.04             | 0.03                          | 0.03 | 0.02            | -    | 0.03 | -                | -                              | 0.02 |        |
| SPC38D     | 69.14            | 0.09             | 2.86                           | 0.63 | 0.65 | 0.76 | 7.02  | 16.25             | 0.88             | 0.12                          | 0.83 | 0.22            | -    | 0.08 | -                | 0.07                           | 0.10 | 99.69  |
| n=5        | 0.73             | 0.02             | 0.21                           | 0.22 | 0.34 | 0.15 | 0.36  | 0.51              | 0.11             | 0.04                          | 0.25 | 0.09            | -    | 0.03 | -                | 0.03                           | 0.01 |        |
| SPC38L     | 67.48            | 0.12             | 2.66                           | 0.97 | 0.57 | 0.90 | 6.74  | 17.46             | 0.80             | 0.12                          | 0.96 | 0.31            | -    | 0.14 | 0.05             | 0.49                           | 0.23 | 100.01 |
| n=5        | 0.43             | 0.01             | 0.18                           | 0.16 | 0.07 | 0.05 | 0.33  | 0.35              | 0.09             | 0.01                          | 0.06 | 0.03            | -    | 0.05 | 0.01             | 0.42                           | 0.10 |        |
| SPC38tot   | 68.31            | 0.11             | 2.76                           | 0.80 | 0.61 | 0.83 | 6.88  | 16.86             | 0.84             | 0.12                          | 0.89 | 0.26            | -    | 0.11 | 0.03             | 0.28                           | 0.16 | 99.85  |
| n=10       | 1.17             | 0.02             | 0.15                           | 0.24 | 0.05 | 0.10 | 0.20  | 0.86              | 0.06             | 0.00                          | 0.09 | 0.06            | -    | 0.05 | 0.04             | 0.30                           | 0.09 |        |
| SPC39      | 66.61            | 0.14             | 2.63                           | 0.92 | 0.61 | 1.19 | 7.80  | 17.39             | 0.94             | 0.20                          | 0.73 | 0.29            | -    | 0.03 | -                | 0.03                           | 0.06 | 99.57  |
| n=13       | 0.22             | 0.03             | 0.06                           | 0.04 | 0.04 | 0.10 | 0.20  | 0.19              | 0.05             | 0.04                          | 0.05 | 0.02            | -    | 0.01 | -                | 0.01                           | 0.01 |        |

|                  | SiO <sub>2</sub> | TiO <sub>2</sub> | Al <sub>2</sub> O <sub>3</sub> | FeO  | MnO  | MgO  | CaO  | Na <sub>2</sub> O | K <sub>2</sub> O | P <sub>2</sub> O <sub>5</sub> | Cl   | SO <sub>3</sub> | CoO | CuO  | SnO <sub>2</sub> | Sb <sub>2</sub> O <sub>5</sub> | PbO  | Total  |
|------------------|------------------|------------------|--------------------------------|------|------|------|------|-------------------|------------------|-------------------------------|------|-----------------|-----|------|------------------|--------------------------------|------|--------|
| SPC40            | 66.71            | 0.12             | 2.76                           | 0.79 | 0.56 | 1.02 | 7.85 | 16.90             | 0.68             | 0.14                          | 0.87 | 0.26            | -   | 0.15 | 0.14             | 0.09                           | 0.76 | 99.81  |
| n=7              | 0.24             | 0.04             | 0.05                           | 0.04 | 0.02 | 0.04 | 0.03 | 0.17              | 0.03             | 0.01                          | 0.03 | 0.01            | -   | 0.01 | 0.03             | 0.03                           | 0.04 |        |
| <b>Filaments</b> |                  |                  |                                |      |      |      |      |                   |                  |                               |      |                 |     |      |                  |                                |      |        |
| SPC9F            | 66.24            | 0.11             | 2.63                           | 1.02 | 0.65 | 1.07 | 6.66 | 17.61             | 0.72             | 0.17                          | 0.96 | 0.30            | -   | 0.01 | 1.24             | 0.01                           | 0.57 | 100.05 |
| n=4              | 0.07             | 0.04             | 0.04                           | 0.02 | 0.02 | 0.06 | 0.06 | 0.07              | 0.04             | 0.02                          | 0.03 | 0.01            | -   | 0.01 | 0.07             | 0.01                           | 0.02 |        |
| SPC16F           | 70.76            | 0.07             | 2.99                           | 1.30 | 0.02 | 0.52 | 6.47 | 14.05             | 0.74             | 0.07                          | 0.85 | 0.09            | -   | -    | 0.66             | 0.04                           | 1.06 | 99.70  |
| n=8              | 1.70             | 0.04             | 0.08                           | 1.75 | 0.01 | 0.04 | 0.31 | 0.33              | 0.07             | 0.03                          | 0.03 | 0.01            | -   | -    | 0.12             | 0.01                           | 0.06 |        |
| SPC17F           | 63.54            | 0.09             | 2.76                           | 0.73 | 0.19 | 0.91 | 7.53 | 14.28             | 0.85             | 0.12                          | 0.78 | 0.23            | -   | 0.12 | 4.21             | -                              | 3.31 | 99.65  |
| n=10             | 0.23             | 0.04             | 0.13                           | 0.07 | 0.01 | 0.03 | 0.14 | 0.14              | 0.04             | 0.03                          | 0.02 | 0.01            | -   | 0.04 | 0.33             | -                              | 0.28 |        |
| SPC39F           | 65.39            | 0.14             | 3.14                           | 0.93 | 0.58 | 1.13 | 7.65 | 17.17             | 0.91             | 0.18                          | 0.75 | 0.29            | -   | -    | 1.24             | -                              | 0.59 | 100.10 |
| n=5              | 0.72             | 0.04             | 1.23                           | 0.04 | 0.02 | 0.04 | 0.19 | 0.27              | 0.03             | 0.03                          | 0.02 | 0.01            | -   | -    | 0.07             | -                              | 0.04 |        |
| SPC40F           | 66.72            | 0.10             | 2.54                           | 0.79 | 0.52 | 1.16 | 7.42 | 16.78             | 0.71             | 0.16                          | 0.89 | 0.30            | -   | 0.12 | 0.13             | 0.59                           | 0.70 | 99.63  |
| n=5              | 0.08             | 0.04             | 0.08                           | 0.02 | 0.03 | 0.04 | 0.06 | 0.08              | 0.03             | 0.02                          | 0.02 | 0.02            | -   | 0.03 | 0.03             | 0.05                           | 0.01 |        |

Table S2. The results achieved by LA-ICP-MS on the glass collection from San Pietro in Castello. All values are provided as ppm. [n=number of measurements; sd=standard deviation].

| Sample | SPC1   |       | SPC2   |       | SPC3   |       | SPC4   |       | SPC5   |       | SPC6   |       | SPC7   |       |
|--------|--------|-------|--------|-------|--------|-------|--------|-------|--------|-------|--------|-------|--------|-------|
|        | n=3    | sd    | n=4    | sd    | n=3    | sd    |
| Li     | 5.66   | 0.22  | 7.54   | 0.27  | 6.35   | 0.59  | 6.13   | 0.12  | 7.59   | 0.21  | 7.52   | 0.80  | 5.07   | 0.24  |
| Be     | 0.30   | 0.23  | 0.36   | 0.01  | 0.43   | 0.04  | 0.29   | 0.18  | 0.41   | 0.18  | 0.47   | 0.13  | 0.33   | 0.14  |
| B      | 154.5  | 5.9   | 150.8  | 3.9   | 147.4  | 2.3   | 174.8  | 1.3   | 183.3  | 3.7   | 189.7  | 2.1   | 136.7  | 11.9  |
| Sc     | 2.3    | 0.1   | 3.0    | 0.2   | 2.4    | 0.1   | 2.2    | 0.0   | 2.8    | 0.0   | 3.1    | 0.2   | 3.4    | 0.7   |
| Ti     | 863    | 24    | 837    | 21    | 884    | 18    | 708    | 6     | 950    | 6     | 879    | 14    | 470    | 18    |
| V      | 25     | 1     | 28     | 0     | 24     | 1     | 23     | 1     | 53     | 0     | 31     | 0     | 9      | 1     |
| Cr     | 16     | 1     | 15     | 1     | 16     | 1     | 13     | 0     | 17     | 1     | 16     | 1     | 23     | 19    |
| Co     | 6      | 0     | 7      | 0     | 6      | 0     | 46     | 1     | 26     | 0     | 8      | 1     | 2      | 0     |
| Ni     | 9      | 1     | 9      | 1     | 8      | 0     | 21     | 0     | 28     | 1     | 13     | 1     | 4      | 0     |
| Cu     | 39     | 1     | 91     | 2     | 38     | 1     | 1505   | 13    | 159    | 2     | 96     | 4     | 25     | 1     |
| Zn     | 21     | 1     | 26     | 1     | 22     | 0     | 370    | 5     | 51     | 1     | 25     | 1     | 11     | 0     |
| Ga     | 3.0    | 0.1   | 3.0    | 0.2   | 3.0    | 0.2   | 2.9    | 0.1   | 3.6    | 0.1   | 3.1    | 0.1   | 2.9    | 0.1   |
| Ge     | 1.09   | 0.37  | 1.25   | 0.43  | 0.93   | 0.12  | 1.46   | 0.45  | 1.19   | 0.14  | 1.55   | 0.61  | -      | -     |
| As     | 6.3    | 0.3   | 5.3    | 0.5   | 4.4    | 0.3   | 9.3    | 0.3   | 15.4   | 0.3   | 6.2    | 0.4   | 2.1    | 0.2   |
| Rb     | 7.7    | 0.2   | 8.1    | 0.1   | 8.7    | 0.3   | 7.1    | 0.0   | 9.2    | 0.2   | 7.6    | 0.2   | 8.8    | 0.3   |
| Sr     | 615    | 7     | 724    | 6     | 694    | 15    | 590    | 3     | 671    | 8     | 777    | 12    | 511    | 1     |
| Y      | 7.8    | 0.2   | 7.7    | 0.1   | 7.8    | 0.2   | 7.2    | 0.1   | 10.9   | 0.0   | 8.4    | 0.2   | 7.0    | 0.0   |
| Zr     | 88.1   | 3.5   | 79.9   | 0.7   | 93.9   | 1.7   | 71.2   | 1.3   | 93.7   | 1.7   | 87.7   | 1.1   | 44.5   | 0.9   |
| Nb     | 2.56   | 0.12  | 2.44   | 0.07  | 2.81   | 0.03  | 2.19   | 0.06  | 2.93   | 0.03  | 2.65   | 0.07  | 1.54   | 0.04  |
| Mo     | 1.94   | 0.11  | 3.30   | 0.12  | 1.92   | 0.11  | 2.91   | 0.08  | 3.84   | 0.29  | 3.73   | 0.09  | 0.25   | 0.04  |
| Ag     | 0.04   | 0.00  | 0.11   | 0.01  | 0.06   | 0.02  | 2.90   | 0.11  | 0.30   | 0.01  | 0.10   | 0.02  | 0.04   | 0.00  |
| Cd     | -      | -     | 0.43   | -     | -      | -     | -      | -     | 0.22   | -     | 0.20   | -     | -      | -     |
| In     | 0.03   | 0.01  | 0.09   | 0.01  | 0.04   | 0.01  | 9.49   | 0.13  | 0.17   | 0.01  | 0.08   | 0.03  | 0.02   | 0.00  |
| Sn     | 5      | 0     | 23     | 3     | 7      | 1     | 2390   | 32    | 30     | 0     | 15     | 4     | 3      | 0     |
| Sb     | 64     | 6     | 158    | 13    | 209    | 6     | 115    | 0     | 120    | 1     | 145    | 13    | 8      | 1     |
| Cs     | 0.111  | 0.018 | 0.105  | 0.019 | 0.116  | 0.015 | 0.106  | 0.013 | 0.187  | 0.009 | 0.115  | 0.007 | 0.100  | 0.006 |
| Ba     | 275    | 4     | 338    | 2     | 249    | 8     | 273    | 2     | 259    | 1     | 384    | 6     | 234    | 3     |
| La     | 8.197  | 0.317 | 7.910  | 0.198 | 8.217  | 0.275 | 7.277  | 0.159 | 12.143 | 0.201 | 8.617  | 0.196 | 6.640  | 0.078 |
| Ce     | 13.680 | 0.477 | 13.310 | 0.296 | 14.200 | 0.229 | 12.177 | 0.125 | 15.363 | 0.167 | 14.250 | 0.458 | 12.100 | 0.062 |
| Pr     | 1.827  | 0.064 | 1.744  | 0.056 | 1.770  | 0.087 | 1.620  | 0.070 | 2.673  | 0.012 | 1.843  | 0.060 | 1.475  | 0.031 |
| Nd     | 7.847  | 0.265 | 7.463  | 0.137 | 7.630  | 0.280 | 6.660  | 0.235 | 10.910 | 0.111 | 7.330  | 0.322 | 6.217  | 0.064 |
| Sm     | 1.520  | 0.284 | 1.560  | 0.063 | 1.657  | 0.115 | 1.477  | 0.096 | 2.287  | 0.145 | 1.533  | 0.132 | 1.253  | 0.050 |
| Eu     | 0.350  | 0.032 | 0.406  | 0.059 | 0.455  | 0.034 | 0.358  | 0.048 | 0.594  | 0.053 | 0.402  | 0.020 | 0.388  | 0.037 |
| Gd     | 1.300  | 0.098 | 1.425  | 0.091 | 1.440  | 0.135 | 1.320  | 0.087 | 2.173  | 0.023 | 1.387  | 0.072 | 1.147  | 0.169 |
| Tb     | 0.237  | 0.009 | 0.231  | 0.030 | 0.221  | 0.022 | 0.196  | 0.030 | 0.343  | 0.015 | 0.227  | 0.025 | 0.181  | 0.016 |
| Dy     | 1.313  | 0.102 | 1.268  | 0.025 | 1.383  | 0.091 | 1.117  | 0.012 | 1.993  | 0.140 | 1.380  | 0.082 | 1.163  | 0.137 |
| Ho     | 0.277  | 0.018 | 0.283  | 0.026 | 0.263  | 0.033 | 0.258  | 0.024 | 0.398  | 0.022 | 0.301  | 0.014 | 0.233  | 0.003 |
| Er     | 0.753  | 0.031 | 0.744  | 0.051 | 0.696  | 0.053 | 0.718  | 0.021 | 1.190  | 0.078 | 0.777  | 0.151 | 0.628  | 0.028 |
| Tm     | 0.102  | 0.003 | 0.098  | 0.012 | 0.095  | 0.015 | 0.104  | 0.009 | 0.172  | 0.009 | 0.111  | 0.007 | 0.090  | 0.005 |
| Yb     | 0.760  | 0.056 | 0.739  | 0.107 | 0.797  | 0.055 | 0.703  | 0.040 | 1.010  | 0.122 | 0.783  | 0.065 | 0.586  | 0.081 |
| Lu     | 0.126  | 0.007 | 0.110  | 0.010 | 0.113  | 0.006 | 0.101  | 0.008 | 0.154  | 0.005 | 0.119  | 0.007 | 0.076  | 0.004 |
| Hf     | 2.107  | 0.235 | 1.850  | 0.152 | 2.103  | 0.117 | 1.683  | 0.114 | 2.270  | 0.131 | 2.117  | 0.059 | 1.210  | 0.115 |
| Ta     | 0.145  | 0.016 | 0.139  | 0.019 | 0.165  | 0.011 | 0.137  | 0.009 | 0.179  | 0.018 | 0.161  | 0.002 | 0.085  | 0.008 |
| W      | 0.184  | 0.091 | 0.220  | 0.056 | 0.146  | 0.032 | 0.347  | 0.018 | 0.335  | 0.059 | 0.283  | 0.043 | 0.068  | 0.012 |
| Au     | -      | -     | 0.007  | 0.001 | 0.007  | -     | 0.205  | 0.041 | 0.052  | 0.007 | 0.009  | 0.005 | 0.009  | 0.006 |
| Tl     | -      | -     | 0.084  | 0.022 | -      | -     | -      | -     | -      | -     | -      | -     | -      | -     |
| Pb     | 53     | 2     | 132    | 3     | 65     | 2     | 6644   | 38    | 391    | 7     | 128    | 12    | 31     | 1     |
| Th     | 1.367  | 0.045 | 1.263  | 0.084 | 1.470  | 0.108 | 1.167  | 0.085 | 1.613  | 0.160 | 1.443  | 0.093 | 0.865  | 0.013 |
| U      | 1.337  | 0.015 | 1.088  | 0.063 | 1.227  | 0.084 | 1.103  | 0.093 | 1.300  | 0.080 | 1.299  | 0.048 | 0.835  | 0.042 |

(continued)

| Sample | SPC8   |       | SPC9   |       | SPC10  |       | SPC11  |       | SPC12  |       | SPC13 |       | SPC14  |       |
|--------|--------|-------|--------|-------|--------|-------|--------|-------|--------|-------|-------|-------|--------|-------|
|        | n=3    | sd    | n=6    | sd    | n=3    | sd    | n=3    | sd    | n=3    | sd    | n=2   | sd    | n=3    | sd    |
| Li     | 8.11   | 0.21  | 5.84   | 1.01  | 3.64   | 0.15  | 5.36   | 0.18  | 3.63   | 0.29  | 4.23  | 0.11  | 3.28   | 0.04  |
| Be     | 0.52   | 0.13  | 0.24   | 0.11  | 0.29   | 0.13  | 0.41   | 0.09  | 0.26   | 0.07  | 0.23  | 0.08  | 0.43   | 0.18  |
| B      | 160.4  | 3.3   | 158.0  | 4.1   | 94.4   | 1.8   | 104.9  | 4.8   | 134.7  | 5.7   | 142.4 | 1.9   | 97.9   | 3.3   |
| Sc     | 2.8    | 0.0   | 2.3    | 0.1   | 1.5    | 0.0   | 2.4    | 0.1   | 3.2    | 0.2   | 2.4   | 0.0   | 1.6    | 0.1   |
| Ti     | 961    | 14    | 769    | 13    | 450    | 9     | 643    | 5     | 456    | 10    | 816   | 12    | 467    | 8     |
| V      | 41     | 0     | 21     | 0     | 8      | 0     | 15     | 0     | 8      | 0     | 15    | 0     | 8      | 0     |
| Cr     | 18     | 1     | 18     | 0     | 17     | 0     | 17     | 0     | 18     | 1     | 15    | 0     | 15     | 1     |
| Co     | 23     | 0     | 23     | 10    | 1      | 0     | 13     | 0     | 1      | 0     | 3     | 0     | 1      | 0     |
| Ni     | 24     | 0     | 13     | 1     | 3      | 0     | 8      | 0     | 3      | 0     | 5     | 0     | 3      | 0     |
| Cu     | 196    | 3     | 804    | 487   | 11     | 0     | 773    | 7     | 10     | 1     | 21    | 0     | 10     | 0     |
| Zn     | 50     | 1     | 46     | 12    | 5      | 0     | 91     | 2     | 5      | 0     | 15    | 0     | 6      | 0     |
| Ga     | 3.6    | 0.0   | 2.8    | 0.1   | 2.9    | 0.1   | 3.2    | 0.1   | 2.9    | 0.1   | 1.8   | 0.0   | 2.9    | 0.2   |
| Ge     | 1.26   | 0.46  | 1.15   | 0.21  | 0.83   | -     | 1.08   | 0.00  | 0.70   | 0.10  | -     | -     | 0.93   | 0.18  |
| As     | 8.0    | 1.0   | 13.4   | 7.0   | 1.6    | 0.3   | 9.9    | 0.4   | 1.5    | 0.1   | 1.7   | 0.1   | 1.5    | 0.2   |
| Rb     | 9.2    | 0.2   | 8.9    | 0.4   | 8.3    | 0.1   | 9.4    | 0.1   | 8.4    | 0.2   | 5.5   | 0.2   | 8.3    | 0.2   |
| Sr     | 751    | 16    | 497    | 51    | 365    | 4     | 489    | 5     | 375    | 7     | 631   | 19    | 390    | 6     |
| Y      | 8.9    | 0.1   | 7.0    | 0.2   | 6.0    | 0.1   | 7.2    | 0.1   | 6.2    | 0.1   | 4.7   | 0.1   | 6.2    | 0.1   |
| Zr     | 91.9   | 2.2   | 70.7   | 1.5   | 47.4   | 0.5   | 58.5   | 0.4   | 48.8   | 1.3   | 68.1  | 0.5   | 49.6   | 0.7   |
| Nb     | 2.78   | 0.02  | 2.07   | 0.10  | 1.41   | 0.04  | 2.03   | 0.09  | 1.44   | 0.06  | 2.02  | 0.10  | 1.45   | 0.03  |
| Mo     | 5.15   | 0.09  | 2.09   | 0.21  | 0.36   | 0.01  | 0.79   | 0.10  | 0.35   | 0.04  | 0.78  | 0.02  | 0.32   | 0.06  |
| Ag     | 0.33   | 0.01  | 1.18   | 0.53  | 0.01   | 0.01  | 0.72   | 0.02  | 0.03   | 0.00  | 0.05  | 0.02  | 0.02   | 0.00  |
| Cd     | -      | -     | -      | -     | -      | -     | -      | -     | -      | -     | -     | -     | -      | -     |
| In     | 0.37   | 0.04  | 0.81   | 0.20  | 0.01   | 0.00  | 0.74   | 0.00  | 0.01   | 0.00  | 0.02  | 0.00  | 0.01   | 0.00  |
| Sn     | 85     | 7     | 198    | 49    | 1      | 0     | 193    | 3     | 1      | 0     | 4     | 1     | 1      | 0     |
| Sb     | 153    | 3     | 1235   | 796   | -      | -     | 561    | 7     | -      | -     | 67    | 1     | 0      | 0     |
| Cs     | 0.143  | 0.020 | 0.140  | 0.020 | 0.095  | 0.005 | 0.148  | 0.006 | 0.088  | 0.003 | 0.068 | 0.010 | 0.080  | 0.001 |
| Ba     | 312    | 3     | 275    | 13    | 203    | 1     | 233    | 2     | 207    | 5     | 183   | 5     | 212    | 2     |
| La     | 9.467  | 0.241 | 7.083  | 0.280 | 5.783  | 0.081 | 7.267  | 0.104 | 6.100  | 0.115 | 4.565 | 0.177 | 6.120  | 0.261 |
| Ce     | 14.337 | 0.437 | 12.320 | 0.468 | 10.547 | 0.095 | 12.827 | 0.049 | 10.830 | 0.329 | 8.695 | 0.276 | 11.103 | 0.170 |
| Pr     | 2.040  | 0.060 | 1.571  | 0.096 | 1.303  | 0.012 | 1.575  | 0.098 | 1.334  | 0.065 | 1.039 | 0.011 | 1.343  | 0.012 |
| Nd     | 8.467  | 0.474 | 6.628  | 0.182 | 5.480  | 0.221 | 6.900  | 0.104 | 5.680  | 0.115 | 4.560 | 0.735 | 5.840  | 0.161 |
| Sm     | 1.840  | 0.130 | 1.342  | 0.117 | 1.120  | 0.096 | 1.263  | 0.047 | 1.203  | 0.059 | 0.721 | 0.003 | 1.290  | 0.095 |
| Eu     | 0.459  | 0.060 | 0.362  | 0.025 | 0.362  | 0.043 | 0.419  | 0.013 | 0.359  | 0.029 | 0.213 | 0.072 | 0.309  | 0.014 |
| Gd     | 1.553  | 0.095 | 1.238  | 0.151 | 1.137  | 0.086 | 1.270  | 0.106 | 1.035  | 0.041 | 0.741 | 0.030 | 1.083  | 0.107 |
| Tb     | 0.249  | 0.014 | 0.191  | 0.012 | 0.164  | 0.010 | 0.204  | 0.018 | 0.188  | 0.006 | 0.136 | 0.004 | 0.177  | 0.023 |
| Dy     | 1.647  | 0.085 | 1.211  | 0.144 | 0.957  | 0.085 | 1.143  | 0.076 | 0.968  | 0.046 | 0.792 | 0.066 | 1.013  | 0.050 |
| Ho     | 0.330  | 0.012 | 0.259  | 0.015 | 0.213  | 0.044 | 0.256  | 0.004 | 0.207  | 0.017 | 0.167 | 0.006 | 0.211  | 0.010 |
| Er     | 0.827  | 0.061 | 0.631  | 0.073 | 0.556  | 0.067 | 0.665  | 0.040 | 0.587  | 0.086 | 0.452 | 0.059 | 0.595  | 0.059 |
| Tm     | 0.136  | 0.026 | 0.097  | 0.011 | 0.078  | 0.008 | 0.097  | 0.006 | 0.072  | 0.007 | 0.069 | 0.001 | 0.090  | 0.007 |
| Yb     | 0.883  | 0.038 | 0.661  | 0.057 | 0.513  | 0.074 | 0.610  | 0.081 | 0.568  | 0.072 | 0.458 | 0.096 | 0.556  | 0.049 |
| Lu     | 0.131  | 0.015 | 0.095  | 0.017 | 0.073  | 0.011 | 0.093  | 0.015 | 0.074  | 0.001 | 0.076 | 0.005 | 0.086  | 0.011 |
| Hf     | 2.240  | 0.210 | 1.662  | 0.148 | 1.077  | 0.203 | 1.503  | 0.099 | 1.173  | 0.032 | 1.620 | 0.042 | 1.243  | 0.220 |
| Ta     | 0.168  | 0.042 | 0.138  | 0.011 | 0.078  | 0.016 | 0.115  | 0.015 | 0.087  | 0.010 | 0.109 | 0.016 | 0.078  | 0.004 |
| W      | 0.299  | 0.026 | 0.998  | 0.659 | 0.101  | 0.015 | 0.217  | 0.034 | 0.067  | 0.006 | 0.042 | 0.004 | 0.063  | 0.017 |
| Au     | 0.050  | 0.023 | 0.683  | 0.403 | -      | -     | 0.246  | 0.026 | -      | -     | 0.006 | -     | 0.006  | -     |
| Tl     | -      | -     | 0.015  | 0.004 | -      | -     | -      | -     | 0.004  | 0.003 | 0.008 | 0.002 | -      | -     |
| Pb     | 615    | 75    | 1654   | 897   | 4      | 0     | 2671   | 37    | 4      | 0     | 14    | 0     | 4      | 0     |
| Th     | 1.487  | 0.199 | 1.106  | 0.053 | 0.705  | 0.064 | 1.062  | 0.046 | 0.815  | 0.045 | 0.871 | 0.057 | 0.866  | 0.117 |
| U      | 1.147  | 0.081 | 0.998  | 0.053 | 0.775  | 0.040 | 1.102  | 0.079 | 0.760  | 0.030 | 1.215 | 0.021 | 0.767  | 0.030 |

(continued)

| Sample Element | SPC16  |       | SPC17  |       | SPC18L |       | SPC19  |       | SPC20  |       | SPC21R |       | SPC22blue |       |
|----------------|--------|-------|--------|-------|--------|-------|--------|-------|--------|-------|--------|-------|-----------|-------|
|                | n=5    | sd    | n=5    | sd    | n=3    | sd    | n=3    | sd    | n=3    | sd    | n=6    | sd    | n=6       | sd    |
| Li             | 5.37   | 0.41  | 4.15   | 0.33  | 5.08   | 0.43  | 3.88   | 0.13  | 3.34   | 0.23  | 5.93   | 0.22  | 4.85      | 0.40  |
| Be             | 0.29   | 0.14  | 0.32   | 0.10  | 0.37   | 0.21  | 0.33   | 0.07  | 0.20   | 0.16  | 0.45   | 0.12  | 0.25      | 0.08  |
| B              | 84.8   | 11.3  | 118.3  | 5.5   | 114.5  | 2.8   | 54.6   | 2.4   | 64.1   | 2.2   | 152.3  | 6.6   | 219.8     | 30.1  |
| Sc             | 1.9    | 0.0   | 2.0    | 0.1   | 2.3    | 0.0   | 1.8    | 0.0   | 1.9    | 0.0   | 4.3    | 0.2   | 4.3       | 0.1   |
| Ti             | 493    | 13    | 529    | 18    | 632    | 9     | 439    | 13    | 440    | 19    | 1044   | 25    | 1842      | 42    |
| V              | 10     | 0     | 12     | 0     | 16     | 1     | 8      | 0     | 8      | 0     | 32     | 1     | 37        | 1     |
| Cr             | 13     | 1     | 18     | 1     | 17     | 4     | 18     | 0     | 12     | 0     | 71     | 10    | 42        | 5     |
| Co             | 2      | 0     | 8      | 0     | 37     | 5     | 1      | 0     | 1      | 0     | 67     | 1     | 1151      | 127   |
| Ni             | 5      | 1     | 10     | 1     | 43     | 7     | 4      | 0     | 4      | 0     | 71     | 4     | 233       | 133   |
| Cu             | 19     | 3     | 313    | 14    | 2053   | 18    | 11     | 0     | 9      | 0     | 3026   | 55    | 6257      | 88    |
| Zn             | 7      | 2     | 33     | 1     | 645    | 84    | 5      | 0     | 6      | 1     | 5437   | 560   | 350       | 12    |
| Ga             | 3.1    | 0.1   | 2.9    | 0.1   | 3.0    | 0.1   | 2.8    | 0.2   | 3.1    | 0.1   | 3.9    | 0.0   | 7.8       | 0.5   |
| Ge             | 1.72   | 0.93  | 0.99   | 0.18  | 0.94   | 0.12  | 0.89   | 0.14  | 0.84   | 0.06  | 1.63   | 0.09  | 6.72      | 0.22  |
| As             | 1.4    | 0.1   | 4.5    | 0.4   | 33.2   | 2.7   | 1.6    | 0.2   | 1.5    | 0.3   | 34.3   | 1.5   | 103.1     | 2.4   |
| Rb             | 9.2    | 0.4   | 8.3    | 0.2   | 7.2    | 0.1   | 11.8   | 0.2   | 6.3    | 0.2   | 12.3   | 0.2   | 5.0       | 0.1   |
| Sr             | 363    | 7     | 473    | 11    | 539    | 5     | 502    | 14    | 511    | 13    | 463    | 10    | 427       | 7     |
| Y              | 6.9    | 0.1   | 6.6    | 0.2   | 7.1    | 0.1   | 7.0    | 0.2   | 7.6    | 0.1   | 8.6    | 0.2   | 8.4       | 0.2   |
| Zr             | 46.3   | 1.1   | 52.1   | 1.2   | 58.9   | 0.6   | 46.0   | 1.1   | 40.9   | 0.9   | 88.0   | 1.8   | 161.9     | 2.5   |
| Nb             | 1.66   | 0.05  | 1.68   | 0.07  | 2.00   | 0.03  | 1.40   | 0.06  | 1.52   | 0.07  | 2.88   | 0.07  | 3.81      | 0.06  |
| Mo             | 0.55   | 0.11  | 0.78   | 0.07  | 1.21   | 0.12  | 0.32   | 0.10  | 0.15   | 0.01  | 2.46   | 0.29  | 11.22     | 0.40  |
| Ag             | 0.03   | 0.01  | 0.45   | 0.07  | 9.93   | 0.17  | 0.03   | 0.00  | 0.02   | 0.00  | 4.92   | 0.46  | 0.55      | 0.04  |
| Cd             | -      | -     | 0.17   | -     | 0.26   | 0.01  | -      | -     | -      | -     | 0.46   | -     | -         | -     |
| In             | 0.03   | 0.02  | 0.67   | 0.03  | 10.27  | 1.02  | 0.01   | 0.00  | 0.01   | 0.00  | 4.88   | 0.14  | 2.74      | 0.20  |
| Sn             | 3      | 2     | 166    | 7     | 2622   | 238   | 1      | 0     | 1      | 0     | 1210   | 25    | 51        | 1     |
| Sb             | 2      | 1     | 180    | 7     | 401    | 10    | 0      | 0     | -      | -     | 2113   | 62    | 25        | 1     |
| Cs             | 0.106  | 0.015 | 0.092  | 0.013 | 0.097  | 0.015 | 0.120  | 0.025 | 0.058  | 0.011 | 0.311  | 0.017 | 0.066     | 0.007 |
| Ba             | 220    | 4     | 224    | 6     | 248    | 2     | 202    | 5     | 222    | 4     | 271    | 6     | 355       | 5     |
| La             | 6.728  | 0.224 | 6.546  | 0.190 | 7.203  | 0.116 | 6.450  | 0.208 | 6.953  | 0.244 | 9.105  | 0.283 | 8.647     | 0.130 |
| Ce             | 12.434 | 0.284 | 11.816 | 0.412 | 12.290 | 0.114 | 11.783 | 0.248 | 13.113 | 0.215 | 15.605 | 0.441 | 15.320    | 0.233 |
| Pr             | 1.494  | 0.045 | 1.467  | 0.039 | 1.549  | 0.055 | 1.434  | 0.054 | 1.547  | 0.070 | 1.993  | 0.038 | 1.935     | 0.048 |
| Nd             | 6.520  | 0.335 | 6.414  | 0.263 | 6.720  | 0.364 | 6.263  | 0.208 | 6.783  | 0.265 | 8.198  | 0.276 | 7.953     | 0.150 |
| Sm             | 1.418  | 0.126 | 1.274  | 0.153 | 1.333  | 0.112 | 1.353  | 0.176 | 1.437  | 0.095 | 1.738  | 0.131 | 1.690     | 0.134 |
| Eu             | 0.392  | 0.032 | 0.354  | 0.026 | 0.358  | 0.042 | 0.381  | 0.048 | 0.400  | 0.081 | 0.444  | 0.025 | 0.429     | 0.027 |
| Gd             | 1.130  | 0.096 | 1.106  | 0.095 | 1.177  | 0.064 | 1.182  | 0.164 | 1.243  | 0.067 | 1.507  | 0.131 | 1.523     | 0.102 |
| Tb             | 0.182  | 0.024 | 0.178  | 0.010 | 0.206  | 0.006 | 0.177  | 0.009 | 0.201  | 0.011 | 0.235  | 0.015 | 0.237     | 0.028 |
| Dy             | 1.164  | 0.068 | 1.098  | 0.103 | 1.202  | 0.037 | 1.133  | 0.030 | 1.254  | 0.127 | 1.578  | 0.143 | 1.530     | 0.075 |
| Ho             | 0.227  | 0.012 | 0.215  | 0.013 | 0.271  | 0.003 | 0.216  | 0.021 | 0.287  | 0.030 | 0.325  | 0.028 | 0.299     | 0.025 |
| Er             | 0.660  | 0.051 | 0.628  | 0.071 | 0.687  | 0.010 | 0.607  | 0.036 | 0.696  | 0.028 | 0.849  | 0.062 | 0.878     | 0.060 |
| Tm             | 0.082  | 0.010 | 0.080  | 0.017 | 0.104  | 0.016 | 0.085  | 0.011 | 0.092  | 0.009 | 0.124  | 0.003 | 0.127     | 0.012 |
| Yb             | 0.582  | 0.098 | 0.667  | 0.097 | 0.748  | 0.045 | 0.620  | 0.134 | 0.605  | 0.094 | 0.834  | 0.073 | 0.885     | 0.102 |
| Lu             | 0.088  | 0.017 | 0.086  | 0.013 | 0.101  | 0.009 | 0.085  | 0.009 | 0.099  | 0.012 | 0.130  | 0.012 | 0.137     | 0.016 |
| Hf             | 1.078  | 0.128 | 1.340  | 0.100 | 1.483  | 0.021 | 1.036  | 0.062 | 0.929  | 0.051 | 2.227  | 0.152 | 3.778     | 0.133 |
| Ta             | 0.097  | 0.008 | 0.105  | 0.018 | 0.119  | 0.008 | 0.088  | 0.019 | 0.092  | 0.013 | 0.177  | 0.011 | 0.238     | 0.031 |
| W              | 0.123  | 0.033 | 0.138  | 0.037 | 0.254  | 0.021 | 0.104  | 0.030 | 0.049  | 0.005 | 1.200  | 0.060 | 0.375     | 0.023 |
| Au             | 0.007  | -     | 0.159  | 0.023 | 0.712  | 0.058 | -      | -     | 0.006  | -     | 1.696  | 0.576 | 0.015     | 0.001 |
| Tl             | 0.012  | 0.013 | 0.013  | 0.004 | 0.022  | 0.006 | 0.008  | 0.007 | 0.006  | 0.002 | 0.031  | 0.011 | 0.086     | 0.019 |
| Pb             | 8      | 1     | 1330   | 48    | 18265  | 1769  | 8      | 0     | 4      | 0     | 12832  | 424   | 13131     | 297   |
| Th             | 0.888  | 0.048 | 0.940  | 0.028 | 0.988  | 0.012 | 0.783  | 0.105 | 0.809  | 0.086 | 1.853  | 0.075 | 1.708     | 0.045 |
| U              | 1.314  | 0.187 | 1.106  | 0.059 | 0.907  | 0.110 | 0.580  | 0.036 | 0.799  | 0.044 | 1.192  | 0.064 | 1.103     | 0.092 |

(continued)

| Sample Element | SPC22green |       | SPC23D |       | SPC24(mix) |       | SPC25  |       | SPC26  |       | SPC27  |       | SPC29  |       |
|----------------|------------|-------|--------|-------|------------|-------|--------|-------|--------|-------|--------|-------|--------|-------|
|                | n=6        | sd    | n=4    | sd    | n=4        | sd    | n=3    | sd    | n=3    | sd    | n=4    | sd    | n=3    | sd    |
| Li             | 4.80       | 0.44  | 4.35   | 0.15  | 4.63       | 0.72  | 8.86   | 0.62  | 8.97   | 0.04  | 4.16   | 0.16  | 4.50   | 0.35  |
| Be             | 0.32       | 0.10  | 0.27   | 0.22  | 0.28       | 0.07  | 0.29   | 0.02  | 0.44   | 0.10  | 0.40   | 0.13  | 0.24   | 0.09  |
| B              | 241.4      | 46.2  | 216.2  | 43.6  | 201.5      | 17.2  | 148.7  | 4.2   | 203.5  | 2.3   | 61.9   | 5.2   | 67.8   | 2.5   |
| Sc             | 3.9        | 0.1   | 3.8    | 1.1   | 3.5        | 0.2   | 3.0    | 0.1   | 3.7    | 0.2   | 1.6    | 0.0   | 2.0    | 0.1   |
| Ti             | 1982       | 39    | 518    | 39    | 358        | 25    | 875    | 25    | 912    | 18    | 425    | 15    | 483    | 44    |
| V              | 35         | 1     | 16     | 0     | 14         | 1     | 30     | 1     | 36     | 1     | 8      | 0     | 9      | 1     |
| Cr             | 40         | 1     | 12     | 1     | 11         | 1     | 16     | 0     | 18     | 1     | 14     | 2     | 16     | 5     |
| Co             | 8          | 0     | 408    | 39    | 15         | 2     | 8      | 0     | 9      | 0     | 2      | 0     | 3      | 1     |
| Ni             | 13         | 0     | 21     | 1     | 12         | 1     | 11     | 0     | 13     | 1     | 5      | 0     | 12     | 10    |
| Cu             | 36         | 1     | 971    | 45    | 9611       | 1165  | 93     | 1     | 71     | 3     | 30     | 2     | 106    | 1     |
| Zn             | 24         | 1     | 31     | 1     | 44         | 12    | 23     | 1     | 25     | 1     | 9      | 0     | 17     | 4     |
| Ga             | 3.4        | 0.2   | 3.3    | 0.0   | 2.6        | 0.2   | 3.4    | 0.1   | 3.5    | 0.0   | 3.2    | 0.1   | 3.2    | 0.2   |
| Ge             | 1.14       | 0.27  | 1.93   | 0.43  | 1.03       | 0.12  | 1.40   | 0.40  | 1.38   | 0.11  | 0.99   | 0.17  | 1.08   | -     |
| As             | 2.4        | 0.1   | 27.3   | 5.1   | 21.1       | 5.6   | 5.9    | 0.1   | 5.7    | 0.3   | 1.7    | 0.2   | 2.6    | 0.3   |
| Rb             | 4.8        | 0.1   | 8.2    | 0.3   | 12.1       | 3.2   | 7.7    | 0.1   | 7.4    | 0.2   | 7.8    | 0.2   | 9.6    | 0.1   |
| Sr             | 412        | 12    | 440    | 32    | 437        | 24    | 761    | 15    | 757    | 10    | 479    | 14    | 445    | 6     |
| Y              | 8.5        | 0.2   | 6.4    | 0.2   | 7.0        | 0.3   | 8.1    | 0.1   | 8.2    | 0.2   | 7.3    | 0.1   | 7.0    | 0.2   |
| Zr             | 178.9      | 4.2   | 53.8   | 4.0   | 38.2       | 1.4   | 78.6   | 1.3   | 82.8   | 3.1   | 42.7   | 1.2   | 45.8   | 2.6   |
| Nb             | 4.00       | 0.11  | 1.54   | 0.11  | 1.27       | 0.06  | 2.62   | 0.04  | 2.70   | 0.04  | 1.48   | 0.05  | 1.58   | 0.17  |
| Mo             | 4.70       | 0.27  | 1.98   | 0.18  | 1.71       | 0.16  | 3.46   | 0.09  | 3.62   | 0.20  | 0.23   | 0.03  | 0.36   | 0.13  |
| Ag             | 0.03       | 0.01  | 0.56   | 0.07  | 5.01       | 0.56  | 0.07   | 0.00  | 0.12   | 0.01  | 0.05   | 0.01  | 0.09   | 0.02  |
| Cd             | -          | -     | -      | -     | 0.25       | 0.02  | -      | -     | 0.20   | -     | -      | -     | -      | -     |
| In             | 0.01       | 0.00  | 0.54   | 0.03  | 2.57       | 0.62  | 0.04   | 0.02  | 0.07   | 0.02  | 0.23   | 0.11  | 0.29   | 0.04  |
| Sn             | 1          | 0     | 48     | 2     | 659        | 175   | 8      | 0     | 13     | 0     | 59     | 29    | 76     | 7     |
| Sb             | 0          | 0     | 8599   | 1476  | 3444       | 972   | 224    | 5     | 94     | 3     | 25     | 12    | 101    | 15    |
| Cs             | 0.049      | 0.010 | 0.121  | 0.009 | 0.227      | 0.153 | 0.108  | 0.005 | 0.100  | 0.019 | 0.091  | 0.011 | 0.151  | 0.023 |
| Ba             | 352        | 13    | 203    | 11    | 245        | 14    | 402    | 9     | 373    | 0     | 229    | 4     | 222    | 1     |
| La             | 8.777      | 0.210 | 6.330  | 0.274 | 6.605      | 0.526 | 8.090  | 0.090 | 8.043  | 0.076 | 6.885  | 0.152 | 6.777  | 0.298 |
| Ce             | 16.012     | 0.549 | 10.713 | 0.349 | 11.148     | 0.683 | 13.497 | 0.314 | 13.877 | 0.296 | 12.843 | 0.469 | 12.450 | 0.729 |
| Pr             | 1.955      | 0.091 | 1.389  | 0.028 | 1.460      | 0.093 | 1.757  | 0.021 | 1.803  | 0.049 | 1.590  | 0.032 | 1.545  | 0.087 |
| Nd             | 8.320      | 0.338 | 6.103  | 0.120 | 6.218      | 0.358 | 7.600  | 0.241 | 7.447  | 0.103 | 6.723  | 0.029 | 6.457  | 0.403 |
| Sm             | 1.653      | 0.149 | 1.188  | 0.093 | 1.175      | 0.158 | 1.453  | 0.083 | 1.410  | 0.125 | 1.258  | 0.170 | 1.410  | 0.111 |
| Eu             | 0.440      | 0.027 | 0.330  | 0.045 | 0.412      | 0.059 | 0.430  | 0.068 | 0.426  | 0.033 | 0.390  | 0.030 | 0.387  | 0.038 |
| Gd             | 1.590      | 0.074 | 1.088  | 0.053 | 1.283      | 0.118 | 1.400  | 0.137 | 1.353  | 0.112 | 1.245  | 0.121 | 1.210  | 0.154 |
| Tb             | 0.258      | 0.018 | 0.183  | 0.031 | 0.198      | 0.018 | 0.231  | 0.019 | 0.212  | 0.027 | 0.200  | 0.016 | 0.192  | 0.009 |
| Dy             | 1.570      | 0.127 | 1.110  | 0.079 | 1.145      | 0.152 | 1.327  | 0.099 | 1.363  | 0.061 | 1.175  | 0.066 | 1.156  | 0.106 |
| Ho             | 0.316      | 0.025 | 0.229  | 0.017 | 0.241      | 0.028 | 0.312  | 0.030 | 0.291  | 0.018 | 0.249  | 0.012 | 0.262  | 0.035 |
| Er             | 0.852      | 0.069 | 0.632  | 0.037 | 0.611      | 0.109 | 0.800  | 0.069 | 0.854  | 0.066 | 0.702  | 0.066 | 0.640  | 0.022 |
| Tm             | 0.134      | 0.013 | 0.088  | 0.018 | 0.094      | 0.018 | 0.113  | 0.012 | 0.117  | 0.005 | 0.101  | 0.017 | 0.104  | 0.013 |
| Yb             | 0.876      | 0.053 | 0.603  | 0.169 | 0.607      | 0.076 | 0.738  | 0.073 | 0.804  | 0.052 | 0.615  | 0.029 | 0.686  | 0.067 |
| Lu             | 0.139      | 0.017 | 0.080  | 0.007 | 0.094      | 0.021 | 0.101  | 0.006 | 0.115  | 0.020 | 0.087  | 0.006 | 0.092  | 0.019 |
| Hf             | 4.183      | 0.250 | 1.298  | 0.147 | 1.041      | 0.154 | 1.937  | 0.188 | 1.993  | 0.112 | 1.155  | 0.068 | 1.160  | 0.095 |
| Ta             | 0.233      | 0.028 | 0.113  | 0.017 | 0.077      | 0.015 | 0.140  | 0.013 | 0.144  | 0.014 | 0.092  | 0.007 | 0.081  | 0.007 |
| W              | 0.315      | 0.058 | 0.226  | 0.064 | 0.074      | 0.032 | 0.162  | 0.041 | 0.329  | 0.044 | 0.094  | 0.034 | 0.095  | 0.036 |
| Au             | -          | -     | 0.042  | 0.020 | 0.064      | 0.017 | 0.008  | 0.002 | 0.012  | 0.005 | 0.039  | 0.012 | 0.039  | 0.011 |
| Tl             | 0.039      | 0.010 | 0.057  | 0.020 | 0.033      | 0.014 | -      | -     | -      | -     | -      | -     | 0.003  | -     |
| Pb             | 8          | 2     | 3332   | 659   | 350        | 85    | 70     | 1     | 119    | 5     | 368    | 72    | 277    | 12    |
| Th             | 1.785      | 0.139 | 0.900  | 0.042 | 0.791      | 0.046 | 1.250  | 0.078 | 1.343  | 0.067 | 0.832  | 0.047 | 0.912  | 0.098 |
| U              | 1.128      | 0.060 | 1.095  | 0.134 | 0.829      | 0.070 | 1.139  | 0.081 | 1.250  | 0.083 | 0.762  | 0.067 | 0.719  | 0.055 |

(continued)

| Sample<br>Element | SPC31  |       | SPC32  |       | SPC33  |       | SPC34  |       | SPC35  |       | SPC36  |       |
|-------------------|--------|-------|--------|-------|--------|-------|--------|-------|--------|-------|--------|-------|
|                   | n=3    | sd    | n=4    | sd    | n=4    | sd    | n=3    | sd    | n=3    | sd    | n=3    | sd    |
| Li                | 5.48   | 0.21  | 4.08   | 0.20  | 7.16   | 0.21  | 6.49   | 0.25  | 3.28   | 0.25  | 3.96   | 0.07  |
| Be                | 0.29   | 0.23  | 0.34   | 0.11  | 0.36   | 0.06  | 0.40   | 0.14  | 0.38   | 0.06  | 0.33   | 0.17  |
| B                 | 156.4  | 2.3   | 75.5   | 2.4   | 151.5  | 2.4   | 146.0  | 4.9   | 135.8  | 5.0   | 141.8  | 5.6   |
| Sc                | 2.6    | 0.0   | 2.1    | 0.1   | 3.3    | 0.1   | 2.5    | 0.1   | 2.5    | 0.1   | 2.4    | 0.1   |
| Ti                | 850    | 18    | 423    | 9     | 995    | 3     | 714    | 3     | 325    | 12    | 894    | 18    |
| V                 | 20     | 0     | 8      | 0     | 34     | 0     | 24     | 0     | 9      | 0     | 13     | 0     |
| Cr                | 15     | 1     | 12     | 1     | 18     | 0     | 13     | 0     | 11     | 1     | 18     | 1     |
| Co                | 251    | 15    | 1      | 0     | 6      | 0     | 46     | 0     | 3      | 0     | 3      | 0     |
| Ni                | 92     | 6     | 3      | 0     | 18     | 1     | 20     | 0     | 5      | 0     | 5      | 0     |
| Cu                | 849    | 10    | 12     | 0     | 48     | 1     | 1397   | 9     | 13     | 1     | 18     | 0     |
| Zn                | 26     | 1     | 5      | 0     | 37     | 1     | 379    | 6     | 9      | 1     | 26     | 1     |
| Ga                | 4.2    | 0.1   | 2.8    | 0.1   | 3.4    | 0.1   | 2.8    | 0.0   | 2.6    | 0.1   | 2.2    | 0.2   |
| Ge                | 3.19   | 0.12  | 0.62   | 0.02  | 1.47   | 0.30  | 1.31   | 0.33  | 1.05   | 0.24  | 1.12   | 0.18  |
| As                | 19.9   | 0.7   | 1.2    | 0.2   | 5.4    | 0.4   | 9.5    | 0.5   | 1.4    | 0.1   | 1.1    | 0.3   |
| Rb                | 7.0    | 0.1   | 8.5    | 0.0   | 7.7    | 0.1   | 6.9    | 0.2   | 5.9    | 0.2   | 4.2    | 0.2   |
| Sr                | 570    | 9     | 363    | 8     | 882    | 13    | 578    | 2     | 381    | 6     | 147    | 4     |
| Y                 | 7.2    | 0.1   | 6.3    | 0.1   | 8.4    | 0.1   | 6.9    | 0.1   | 6.3    | 0.2   | 5.4    | 0.2   |
| Zr                | 86.4   | 1.2   | 40.1   | 0.5   | 96.1   | 1.6   | 68.3   | 0.7   | 34.8   | 0.6   | 84.5   | 1.8   |
| Nb                | 2.66   | 0.06  | 1.42   | 0.03  | 3.05   | 0.07  | 2.20   | 0.01  | 1.10   | 0.02  | 2.21   | 0.06  |
| Mo                | 2.65   | 0.24  | 0.41   | 0.03  | 4.41   | 0.12  | 2.88   | 0.20  | 0.51   | 0.12  | 0.14   | 0.03  |
| Ag                | 0.12   | 0.03  | 0.03   | 0.01  | 0.07   | 0.00  | 3.22   | 0.03  | 0.04   | -     | 0.09   | 0.02  |
| Cd                | -      | -     | -      | -     | -      | -     | -      | -     | -      | -     | -      | -     |
| In                | 0.43   | 0.06  | 0.01   | 0.00  | 0.03   | 0.01  | 9.01   | 0.17  | 0.01   | 0.00  | 0.04   | 0.03  |
| Sn                | 30     | 2     | 1      | 0     | 4      | 0     | 2246   | 58    | 2      | 0     | 9      | 4     |
| Sb                | 182    | 3     | 0      | -     | 52     | 1     | 127    | 1     | 286    | 15    | 17     | 6     |
| Cs                | 0.099  | 0.011 | 0.086  | 0.007 | 0.127  | 0.020 | 0.105  | 0.009 | 0.053  | 0.005 | 0.046  | 0.014 |
| Ba                | 176    | 4     | 206    | 1     | 263    | 4     | 265    | 1     | 203    | 4     | 115    | 3     |
| La                | 7.740  | 0.060 | 5.978  | 0.079 | 8.758  | 0.270 | 7.053  | 0.136 | 5.957  | 0.129 | 5.690  | 0.113 |
| Ce                | 13.223 | 0.321 | 10.783 | 0.110 | 14.945 | 0.142 | 11.647 | 0.172 | 10.450 | 0.190 | 10.300 | 0.217 |
| Pr                | 1.690  | 0.028 | 1.328  | 0.065 | 1.914  | 0.049 | 1.534  | 0.080 | 1.334  | 0.010 | 1.299  | 0.029 |
| Nd                | 7.167  | 0.341 | 5.850  | 0.047 | 8.035  | 0.211 | 6.537  | 0.029 | 5.893  | 0.366 | 5.560  | 0.139 |
| Sm                | 1.370  | 0.056 | 1.258  | 0.118 | 1.655  | 0.186 | 1.340  | 0.139 | 1.287  | 0.057 | 1.150  | 0.053 |
| Eu                | 0.383  | 0.020 | 0.320  | 0.033 | 0.397  | 0.029 | 0.352  | 0.020 | 0.352  | 0.019 | 0.297  | 0.033 |
| Gd                | 1.223  | 0.153 | 1.095  | 0.086 | 1.340  | 0.161 | 1.117  | 0.032 | 1.045  | 0.059 | 1.057  | 0.103 |
| Tb                | 0.217  | 0.014 | 0.181  | 0.021 | 0.237  | 0.015 | 0.194  | 0.018 | 0.175  | 0.009 | 0.163  | 0.011 |
| Dy                | 1.310  | 0.017 | 1.012  | 0.100 | 1.479  | 0.140 | 1.271  | 0.095 | 1.061  | 0.033 | 0.957  | 0.047 |
| Ho                | 0.268  | 0.007 | 0.221  | 0.013 | 0.310  | 0.040 | 0.256  | 0.017 | 0.211  | 0.009 | 0.189  | 0.014 |
| Er                | 0.775  | 0.053 | 0.616  | 0.048 | 0.847  | 0.049 | 0.614  | 0.062 | 0.562  | 0.034 | 0.492  | 0.073 |
| Tm                | 0.100  | 0.014 | 0.086  | 0.015 | 0.116  | 0.019 | 0.103  | 0.007 | 0.080  | 0.013 | 0.082  | 0.004 |
| Yb                | 0.753  | 0.052 | 0.572  | 0.068 | 0.818  | 0.072 | 0.646  | 0.043 | 0.570  | 0.142 | 0.560  | 0.139 |
| Lu                | 0.101  | 0.015 | 0.079  | 0.011 | 0.119  | 0.021 | 0.096  | 0.006 | 0.076  | 0.006 | 0.089  | 0.009 |
| Hf                | 2.120  | 0.079 | 1.001  | 0.122 | 2.248  | 0.112 | 1.630  | 0.137 | 0.836  | 0.091 | 2.163  | 0.140 |
| Ta                | 0.163  | 0.004 | 0.082  | 0.018 | 0.175  | 0.013 | 0.123  | 0.010 | 0.067  | 0.005 | 0.145  | 0.016 |
| W                 | 0.233  | 0.029 | 0.081  | 0.034 | 0.228  | 0.022 | 0.370  | 0.110 | 0.032  | 0.022 | 0.050  | 0.013 |
| Au                | 0.014  | 0.002 | -      | -     | 0.009  | 0.004 | 0.211  | 0.036 | 0.005  | 0.000 | -      | -     |
| Tl                | 0.008  | 0.005 | 0.013  | 0.007 | 0.036  | 0.007 | 0.052  | 0.012 | 0.015  | 0.011 | -      | -     |
| Pb                | 2653   | 137   | 3      | 0     | 41     | 1     | 7827   | 586   | 16     | 1     | 73     | 5     |
| Th                | 1.307  | 0.075 | 0.814  | 0.064 | 1.493  | 0.077 | 1.129  | 0.019 | 0.786  | 0.054 | 1.093  | 0.087 |
| U                 | 1.430  | 0.030 | 0.788  | 0.027 | 1.128  | 0.050 | 0.980  | 0.026 | 0.717  | 0.056 | 0.889  | 0.039 |

(continued)

| Sample<br>Element | SPC37 |       | SPC38D |       | SPC39  |       | SPC40  |       | SPC17<br>Filament<br>N=1 | SPC39<br>Filament |       | SPC40<br>Filament |       |
|-------------------|-------|-------|--------|-------|--------|-------|--------|-------|--------------------------|-------------------|-------|-------------------|-------|
|                   | n=3   | sd    | n=6    | sd    | n=3    | sd    | n=3    | sd    |                          | n=3               | sd    | n=3               | sd    |
| Li                | 23.90 | 0.84  | 5.58   | 0.58  | 6.43   | 0.45  | 4.69   | 0.35  | 3.97                     | 5.79              | 0.52  | 4.88              | 0.31  |
| Be                | 0.36  | 0.07  | 0.32   | 0.08  | 0.33   | 0.03  | 0.34   | 0.08  | 0.41                     | 0.34              | 0.03  | 0.35              | 0.08  |
| B                 | 98.4  | 2.5   | 86.5   | 20.6  | 140.9  | 5.7   | 121.6  | 2.5   | 124.4                    | 145.7             | 4.6   | 122.5             | 0.2   |
| Sc                | 1.7   | 0.1   | 1.9    | 0.3   | 2.4    | 0.2   | 2.2    | 0.1   | 1.8                      | 2.4               | 0.1   | 2.2               | 0.1   |
| Ti                | 548   | 5     | 516    | 78    | 775    | 34    | 658    | 13    | 490                      | 743               | 8     | 645               | 10    |
| V                 | 12    | 0     | 13     | 4     | 21     | 0     | 18     | 0     | 11                       | 21                | 0     | 18                | 0     |
| Cr                | 36    | 1     | 14     | 4     | 19     | 1     | 19     | 1     | 18                       | 18                | 1     | 24                | 1     |
| Co                | 11    | 0     | 15     | 13    | 10     | 0     | 38     | 0     | 9                        | 10                | 0     | 33                | 2     |
| Ni                | 11    | 0     | 9      | 5     | 15     | 0     | 19     | 0     | 13                       | 16                | 0     | 23                | 1     |
| Cu                | 1536  | 25    | 554    | 85    | 174    | 3     | 1034   | 11    | 896                      | 160               | 2     | 871               | 34    |
| Zn                | 319   | 4     | 41     | 17    | 34     | 1     | 152    | 1     | 45                       | 40                | 1     | 148               | 2     |
| Ga                | 1.8   | 0.0   | 2.9    | 0.3   | 3.0    | 0.1   | 3.1    | 0.1   | 2.8                      | 2.9               | 0.0   | 3.0               | 0.1   |
| Ge                | 1.21  | 0.23  | 0.95   | 0.19  | 0.99   | 0.02  | 1.37   | 0.28  | 1.02                     | 0.93              | 0.22  | 0.76              | 0.09  |
| As                | 28.4  | 1.5   | 15.5   | 13.0  | 4.8    | 0.2   | 9.2    | 0.5   | 7.2                      | 5.7               | 0.3   | 23.2              | 6.1   |
| Rb                | 19.4  | 0.3   | 18.2   | 2.7   | 9.3    | 0.3   | 8.5    | 0.1   | 8.0                      | 9.4               | 0.4   | 8.8               | 0.2   |
| Sr                | 632   | 7     | 382    | 52    | 546    | 14    | 526    | 2     | 448                      | 527               | 18    | 516               | 10    |
| Y                 | 4.5   | 0.1   | 6.2    | 0.7   | 7.0    | 0.2   | 7.1    | 0.1   | 6.4                      | 6.9               | 0.2   | 7.0               | 0.1   |
| Zr                | 81.0  | 0.3   | 45.0   | 6.4   | 70.5   | 1.3   | 62.7   | 0.8   | 49.1                     | 68.5              | 3.1   | 61.3              | 0.5   |
| Nb                | 2.05  | 0.02  | 1.56   | 0.23  | 2.14   | 0.11  | 1.97   | 0.09  | 1.54                     | 2.08              | 0.10  | 1.93              | 0.00  |
| Mo                | 1.26  | 0.12  | 1.13   | 0.70  | 1.82   | 0.12  | 1.55   | 0.16  | 0.93                     | 1.77              | 0.08  | 1.59              | 0.08  |
| Ag                | 1.84  | 0.03  | 0.52   | 0.10  | 0.53   | 0.06  | 7.65   | 0.22  | 2.45                     | 0.55              | 0.08  | 5.76              | 0.34  |
| Cd                | 0.20  | -     | -      | -     | -      | -     | -      | -     | 0.18                     | 0.22              | -     | -                 | -     |
| In                | 0.51  | 0.02  | 0.65   | 0.72  | 0.61   | 0.03  | 3.84   | 0.04  | 113.89                   | 34.15             | 18.76 | 3.54              | 0.10  |
| Sn                | 62    | 1     | 158    | 182   | 143    | 8     | 975    | 7     | 32430                    | 9573              | 5615  | 891               | 27    |
| Sb                | 14    | 0     | 438    | 482   | 217    | 10    | 429    | 1     | 186                      | 203               | 5     | 3691              | 1414  |
| Cs                | 0.407 | 0.042 | 0.354  | 0.179 | 0.142  | 0.009 | 0.126  | 0.010 | 0.097                    | 0.143             | 0.028 | 0.153             | 0.017 |
| Ba                | 226   | 3     | 220    | 25    | 252    | 6     | 260    | 4     | 209                      | 241               | 8     | 251               | 3     |
| La                | 5.603 | 0.057 | 6.227  | 0.384 | 7.280  | 0.035 | 7.097  | 0.185 | 6.160                    | 7.160             | 0.259 | 7.123             | 0.119 |
| Ce                | 9.340 | 0.095 | 11.012 | 0.574 | 12.673 | 0.158 | 12.370 | 0.139 | 11.420                   | 12.120            | 0.272 | 12.363            | 0.247 |
| Pr                | 1.236 | 0.059 | 1.356  | 0.153 | 1.645  | 0.075 | 1.597  | 0.015 | 1.357                    | 1.576             | 0.036 | 1.529             | 0.042 |
| Nd                | 5.117 | 0.381 | 5.833  | 0.362 | 6.693  | 0.156 | 6.630  | 0.377 | 5.760                    | 6.450             | 0.087 | 6.637             | 0.093 |
| Sm                | 1.060 | 0.046 | 1.320  | 0.126 | 1.357  | 0.120 | 1.440  | 0.125 | 1.280                    | 1.330             | 0.141 | 1.350             | 0.040 |
| Eu                | 0.231 | 0.028 | 0.344  | 0.070 | 0.382  | 0.072 | 0.407  | 0.032 | 0.346                    | 0.385             | 0.021 | 0.374             | 0.019 |
| Gd                | 0.820 | 0.062 | 1.158  | 0.056 | 1.287  | 0.101 | 1.227  | 0.064 | 0.920                    | 1.103             | 0.145 | 1.330             | 0.062 |
| Tb                | 0.129 | 0.014 | 0.155  | 0.013 | 0.197  | 0.004 | 0.195  | 0.002 | 0.191                    | 0.188             | 0.022 | 0.179             | 0.001 |
| Dy                | 0.785 | 0.129 | 1.016  | 0.114 | 1.179  | 0.097 | 1.173  | 0.049 | 0.949                    | 1.116             | 0.059 | 1.155             | 0.023 |
| Ho                | 0.160 | 0.012 | 0.206  | 0.065 | 0.250  | 0.036 | 0.257  | 0.018 | 0.236                    | 0.237             | 0.009 | 0.240             | 0.026 |
| Er                | 0.412 | 0.056 | 0.690  | 0.185 | 0.672  | 0.056 | 0.711  | 0.105 | 0.750                    | 0.661             | 0.039 | 0.639             | 0.043 |
| Tm                | 0.065 | 0.001 | 0.082  | 0.019 | 0.099  | 0.010 | 0.096  | 0.008 | 0.088                    | 0.095             | 0.012 | 0.094             | 0.014 |
| Yb                | 0.460 | 0.013 | 0.567  | 0.112 | 0.602  | 0.038 | 0.657  | 0.058 | 0.620                    | 0.645             | 0.036 | 0.662             | 0.106 |
| Lu                | 0.071 | 0.005 | 0.080  | 0.014 | 0.096  | 0.013 | 0.094  | 0.020 | 0.066                    | 0.094             | 0.021 | 0.093             | 0.019 |
| Hf                | 2.033 | 0.074 | 1.113  | 0.121 | 1.853  | 0.091 | 1.590  | 0.072 | 1.300                    | 1.620             | 0.210 | 1.433             | 0.223 |
| Ta                | 0.132 | 0.005 | 0.098  | 0.025 | 0.141  | 0.021 | 0.110  | 0.011 | 0.106                    | 0.127             | 0.023 | 0.116             | 0.011 |
| W                 | 0.753 | 0.046 | 0.262  | 0.128 | 0.184  | 0.047 | 0.166  | 0.017 | 15.670                   | 0.301             | 0.032 | 0.286             | 0.027 |
| Au                | 0.018 | 0.016 | 0.336  | 0.278 | 0.276  | 0.030 | 0.704  | 0.043 | 0.421                    | 0.271             | 0.058 | 0.699             | 0.106 |
| Tl                | -     | -     | 0.008  | 0.005 | 0.027  | 0.008 | 0.014  | 0.008 | 0.005                    | 0.013             | 0.005 | 0.038             | 0.018 |
| Pb                | 279   | 4     | 916    | 591   | 509    | 24    | 6923   | 64    | 30142                    | 5167              | 630   | 6271              | 145   |
| Th                | 1.400 | 0.066 | 0.825  | 0.073 | 1.165  | 0.103 | 1.033  | 0.005 | 0.859                    | 1.044             | 0.041 | 1.066             | 0.076 |
| U                 | 0.570 | 0.040 | 1.212  | 0.384 | 1.073  | 0.074 | 0.987  | 0.076 | 0.930                    | 1.037             | 0.068 | 0.927             | 0.040 |

Table S3. EMPA full dataset. All values in wt%.

|         | SiO <sub>2</sub> | TiO <sub>2</sub> | Al <sub>2</sub> O <sub>3</sub> | FeO  | MnO  | MgO  | CaO  | Na <sub>2</sub> O | K <sub>2</sub> O | P <sub>2</sub> O <sub>5</sub> | Cl   | SO <sub>3</sub> | CoO | CuO  | SnO <sub>2</sub> | Sb <sub>2</sub> O <sub>5</sub> | PbO  | Total  |
|---------|------------------|------------------|--------------------------------|------|------|------|------|-------------------|------------------|-------------------------------|------|-----------------|-----|------|------------------|--------------------------------|------|--------|
| SPC1_1  | 67.75            | 0.16             | 2.46                           | 1.01 | 1.39 | 1.04 | 7.50 | 16.52             | 0.62             | 0.11                          | 0.91 | 0.39            | -   | -    | -                | -                              | -    | 99.85  |
| SPC1_2  | 68.21            | 0.16             | 2.48                           | 0.90 | 1.30 | 0.97 | 7.61 | 16.30             | 0.56             | 0.10                          | 0.82 | 0.36            | -   | -    | -                | -                              | -    | 99.77  |
| SPC1_3  | 68.94            | 0.13             | 2.30                           | 0.85 | 1.10 | 0.92 | 7.08 | 16.69             | 0.62             | 0.11                          | 0.69 | 0.41            | -   | -    | -                | -                              | -    | 99.85  |
| SPC1_4  | 67.98            | 0.17             | 2.50                           | 0.89 | 1.37 | 0.95 | 7.55 | 16.52             | 0.59             | 0.12                          | 0.87 | 0.37            | -   | -    | -                | -                              | -    | 99.87  |
| SPC1_5  | 68.02            | 0.16             | 2.39                           | 0.87 | 1.39 | 0.93 | 7.50 | 16.76             | 0.54             | 0.12                          | 0.85 | 0.37            | -   | -    | -                | -                              | -    | 99.88  |
| SPC1_6  | 68.33            | 0.08             | 2.38                           | 0.85 | 1.26 | 0.90 | 7.13 | 17.01             | 0.66             | 0.09                          | 0.82 | 0.38            | -   | -    | -                | -                              | -    | 99.88  |
| SPC2_1  | 65.23            | 0.17             | 2.46                           | 0.88 | 1.61 | 1.12 | 7.99 | 18.05             | 0.67             | 0.10                          | 0.92 | 0.34            | -   | -    | -                | -                              | -    | 99.54  |
| SPC2_2  | 65.52            | 0.13             | 2.42                           | 0.83 | 1.69 | 1.08 | 7.84 | 18.07             | 0.65             | 0.10                          | 0.95 | 0.37            | -   | -    | -                | -                              | -    | 99.65  |
| SPC2_3  | 65.28            | 0.17             | 2.43                           | 0.79 | 1.63 | 1.14 | 7.90 | 18.21             | 0.63             | 0.12                          | 0.91 | 0.36            | -   | -    | -                | -                              | -    | 99.57  |
| SPC2_4  | 65.14            | 0.17             | 2.40                           | 0.86 | 1.67 | 1.11 | 7.87 | 18.21             | 0.62             | 0.16                          | 0.94 | 0.36            | -   | -    | -                | -                              | -    | 99.51  |
| SPC2_5  | 65.33            | 0.15             | 2.45                           | 0.91 | 1.65 | 1.10 | 7.98 | 17.97             | 0.61             | 0.10                          | 0.92 | 0.36            | -   | -    | -                | -                              | -    | 99.52  |
| SPC2_6  | 65.53            | 0.16             | 2.45                           | 0.84 | 1.71 | 1.01 | 7.77 | 18.11             | 0.57             | 0.13                          | 0.97 | 0.35            | -   | -    | -                | -                              | -    | 99.60  |
| SPC3_1  | 67.17            | 0.22             | 2.42                           | 0.82 | 1.15 | 0.96 | 8.16 | 16.82             | 0.62             | 0.13                          | 0.84 | 0.40            | -   | -    | -                | -                              | -    | 99.69  |
| SPC3_2  | 67.05            | 0.21             | 2.46                           | 0.79 | 1.26 | 1.00 | 8.16 | 16.93             | 0.63             | 0.07                          | 0.82 | 0.42            | -   | -    | -                | -                              | -    | 99.78  |
| SPC3_3  | 67.41            | 0.13             | 2.47                           | 0.71 | 1.18 | 0.94 | 7.92 | 16.87             | 0.64             | 0.10                          | 0.83 | 0.41            | -   | -    | -                | -                              | -    | 99.59  |
| SPC3_4  | 67.05            | 0.12             | 2.41                           | 0.83 | 1.19 | 0.92 | 8.49 | 16.79             | 0.58             | 0.13                          | 0.84 | 0.42            | -   | -    | -                | -                              | -    | 99.77  |
| SPC3_5  | 67.00            | 0.12             | 2.49                           | 0.76 | 1.23 | 0.99 | 8.36 | 16.94             | 0.58             | 0.10                          | 0.84 | 0.39            | -   | -    | -                | -                              | -    | 99.78  |
| SPC3_6  | 67.27            | 0.14             | 2.48                           | 0.76 | 1.21 | 0.90 | 8.20 | 16.89             | 0.63             | 0.09                          | 0.89 | 0.42            | -   | -    | -                | -                              | -    | 99.86  |
| SPC3_7  | 67.23            | 0.13             | 2.30                           | 0.73 | 1.19 | 0.91 | 7.87 | 17.35             | 0.58             | 0.09                          | 0.93 | 0.42            | -   | -    | -                | -                              | -    | 99.73  |
| SPC4_1  | 63.86            | 0.16             | 2.47                           | 0.86 | 1.19 | 1.03 | 7.23 | 19.82             | 0.58             | 0.18                          | 1.06 | 0.50            | -   | 0.18 | 0.23             | -                              | 0.66 | 99.99  |
| SPC4_2  | 64.06            | 0.17             | 2.36                           | 0.81 | 1.15 | 1.03 | 7.13 | 19.61             | 0.62             | 0.29                          | 1.06 | 0.48            | -   | 0.17 | 0.36             | -                              | 0.75 | 100.05 |
| SPC4_3  | 64.21            | 0.15             | 2.30                           | 0.84 | 1.15 | 0.99 | 7.03 | 19.81             | 0.61             | 0.25                          | 1.07 | 0.47            | -   | 0.18 | 0.34             | -                              | 0.69 | 100.07 |
| SPC4_4  | 64.47            | 0.12             | 2.29                           | 0.77 | 1.08 | 1.04 | 6.75 | 19.78             | 0.64             | 0.26                          | 1.11 | 0.48            | -   | 0.23 | 0.34             | -                              | 0.68 | 100.03 |
| SPC4_5  | 64.25            | 0.13             | 2.42                           | 0.83 | 1.08 | 1.03 | 6.94 | 19.87             | 0.52             | 0.27                          | 1.04 | 0.48            | -   | 0.22 | 0.33             | -                              | 0.77 | 100.19 |
| SPC4_6  | 64.33            | 0.15             | 2.31                           | 0.72 | 1.07 | 0.97 | 6.80 | 20.00             | 0.58             | 0.24                          | 1.09 | 0.47            | -   | 0.20 | 0.36             | -                              | 0.80 | 100.08 |
| SPC5_1  | 64.53            | 0.18             | 2.79                           | 2.12 | 1.36 | 1.33 | 6.99 | 17.78             | 0.99             | 0.24                          | 0.85 | 0.41            | -   | -    | -                | -                              | 0.04 | 99.61  |
| SPC5_2  | 64.05            | 0.21             | 2.70                           | 2.19 | 1.35 | 1.36 | 7.02 | 18.28             | 0.93             | 0.28                          | 0.84 | 0.41            | -   | 0.01 | -                | -                              | 0.04 | 99.66  |
| SPC5_3  | 63.90            | 0.12             | 2.78                           | 2.29 | 1.41 | 1.35 | 7.14 | 18.26             | 0.89             | 0.19                          | 0.88 | 0.42            | -   | -    | -                | -                              | 0.06 | 99.68  |
| SPC5_4  | 64.33            | 0.19             | 2.67                           | 2.17 | 1.32 | 1.35 | 6.90 | 18.19             | 0.86             | 0.25                          | 0.84 | 0.39            | -   | 0.01 | -                | -                              | 0.04 | 99.51  |
| SPC5_5  | 64.15            | 0.13             | 2.78                           | 2.13 | 1.29 | 1.34 | 7.12 | 18.31             | 0.92             | 0.19                          | 0.84 | 0.39            | -   | -    | -                | -                              | 0.06 | 99.66  |
| SPC5_6  | 64.32            | 0.19             | 2.71                           | 2.23 | 1.36 | 1.32 | 6.98 | 18.15             | 0.92             | 0.25                          | 0.85 | 0.43            | -   | -    | -                | -                              | 0.04 | 99.74  |
| SPC6_1  | 64.52            | 0.15             | 2.25                           | 0.86 | 1.35 | 1.10 | 7.74 | 20.15             | 0.64             | 0.14                          | 0.53 | 0.30            | -   | -    | -                | -                              | -    | 99.74  |
| SPC6_2  | 63.70            | 0.17             | 2.38                           | 0.89 | 1.38 | 1.11 | 7.71 | 20.33             | 0.61             | 0.14                          | 0.93 | 0.46            | -   | -    | -                | -                              | -    | 99.80  |
| SPC6_3  | 64.27            | 0.11             | 2.34                           | 0.85 | 1.37 | 1.11 | 7.85 | 20.09             | 0.57             | 0.08                          | 0.89 | 0.48            | -   | -    | -                | -                              | -    | 100.00 |
| SPC6_4  | 63.56            | 0.13             | 2.33                           | 0.80 | 1.38 | 1.14 | 7.90 | 20.47             | 0.64             | 0.13                          | 0.92 | 0.44            | -   | -    | -                | -                              | -    | 99.82  |
| SPC6_5  | 63.79            | 0.12             | 2.44                           | 0.92 | 1.39 | 1.11 | 7.55 | 19.89             | 0.61             | 0.09                          | 0.94 | 0.46            | -   | -    | -                | -                              | -    | 99.28  |
| SPC6_6  | 64.26            | 0.14             | 2.34                           | 0.83 | 1.41 | 1.11 | 7.59 | 20.03             | 0.59             | 0.13                          | 0.97 | 0.42            | -   | -    | -                | -                              | -    | 99.82  |
| SPC6_7  | 63.99            | 0.13             | 2.36                           | 0.81 | 1.37 | 1.11 | 7.82 | 20.15             | 0.62             | 0.13                          | 0.81 | 0.44            | -   | -    | -                | -                              | -    | 99.73  |
| SPC7_1  | 69.31            | 0.08             | 2.76                           | 0.39 | 0.03 | 0.79 | 8.59 | 15.93             | 0.68             | 0.13                          | 0.90 | 0.19            | -   | -    | -                | -                              | -    | 99.79  |
| SPC7_2  | 69.38            | 0.04             | 2.84                           | 0.47 | 0.03 | 0.76 | 8.14 | 16.15             | 0.73             | 0.16                          | 0.90 | 0.18            | -   | -    | -                | -                              | -    | 99.78  |
| SPC7_3  | 68.98            | 0.09             | 2.69                           | 0.45 | 0.05 | 0.79 | 8.38 | 16.33             | 0.74             | 0.15                          | 0.94 | 0.24            | -   | -    | -                | -                              | -    | 99.83  |
| SPC7_4  | 69.11            | 0.04             | 2.89                           | 0.42 | 0.02 | 0.74 | 8.62 | 16.11             | 0.75             | 0.12                          | 0.91 | 0.19            | -   | -    | -                | -                              | -    | 99.91  |
| SPC7_5  | 68.88            | -                | 2.85                           | 0.43 | 0.04 | 0.80 | 8.55 | 16.30             | 0.73             | 0.14                          | 0.95 | 0.21            | -   | -    | -                | -                              | -    | 99.88  |
| SPC7_6  | 68.87            | 0.06             | 2.92                           | 0.41 | 0.04 | 0.81 | 8.52 | 16.15             | 0.76             | 0.19                          | 0.92 | 0.23            | -   | -    | -                | -                              | -    | 99.86  |
| SPC7_7  | 70.00            | 0.09             | 3.06                           | 0.37 | 0.02 | 0.59 | 7.97 | 15.86             | 0.75             | 0.05                          | 0.99 | 0.16            | -   | -    | -                | -                              | -    | 99.89  |
| SPC8_1  | 64.76            | 0.16             | 2.69                           | 1.29 | 1.61 | 1.26 | 7.22 | 18.53             | 0.87             | 0.23                          | 0.84 | 0.37            | -   | -    | -                | -                              | 0.06 | 99.88  |
| SPC8_2  | 64.97            | 0.11             | 2.72                           | 1.37 | 1.60 | 1.21 | 7.34 | 18.12             | 0.89             | 0.21                          | 0.77 | 0.38            | -   | -    | -                | -                              | 0.09 | 99.78  |
| SPC8_3  | 64.94            | 0.14             | 2.68                           | 1.67 | 1.50 | 1.30 | 7.25 | 17.96             | 0.84             | 0.25                          | 0.79 | 0.42            | -   | -    | -                | -                              | 0.06 | 99.79  |
| SPC8_4  | 64.80            | 0.15             | 2.77                           | 1.58 | 1.48 | 1.26 | 7.39 | 17.99             | 0.90             | 0.17                          | 0.82 | 0.40            | -   | -    | -                | -                              | 0.08 | 99.79  |
| SPC8_5  | 64.88            | 0.17             | 2.75                           | 1.25 | 1.52 | 1.22 | 7.62 | 18.15             | 0.81             | 0.22                          | 0.80 | 0.39            | -   | -    | -                | -                              | 0.07 | 99.82  |
| SPC8_6  | 64.87            | 0.19             | 2.70                           | 1.30 | 1.59 | 1.22 | 7.33 | 18.10             | 0.89             | 0.18                          | 0.84 | 0.42            | -   | -    | -                | -                              | 0.06 | 99.68  |
| SPC8_7  | 64.63            | 0.15             | 2.64                           | 1.28 | 1.60 | 1.25 | 7.39 | 18.48             | 0.88             | 0.17                          | 0.80 | 0.41            | -   | -    | -                | -                              | 0.06 | 99.75  |
| SPC8_8  | 64.54            | 0.15             | 2.67                           | 1.71 | 1.51 | 1.27 | 7.41 | 18.10             | 0.93             | 0.24                          | 0.80 | 0.40            | -   | -    | -                | -                              | 0.08 | 99.80  |
| SPC9_1  | 67.34            | 0.08             | 2.62                           | 0.80 | 0.73 | 0.86 | 6.63 | 18.13             | 0.66             | 0.12                          | 1.09 | 0.31            | -   | 0.08 | -                | 0.15                           | 0.17 | 99.76  |
| SPC9_2  | 67.75            | 0.14             | 2.56                           | 0.63 | 0.84 | 0.79 | 6.43 | 18.00             | 0.63             | 0.15                          | 1.11 | 0.28            | -   | 0.09 | -                | 0.18                           | 0.20 | 99.77  |
| SPC9_3  | 67.17            | 0.17             | 2.66                           | 0.77 | 0.79 | 0.82 | 6.57 | 18.07             | 0.57             | 0.13                          | 1.10 | 0.30            | -   | 0.12 | -                | 0.16                           | 0.19 | 99.58  |
| SPC9_4  | 68.06            | 0.29             | 2.90                           | 1.10 | 0.70 | 0.83 | 5.70 | 17.32             | 0.63             | 0.09                          | 1.13 | 0.32            | -   | 0.11 | -                | 0.16                           | 0.19 | 99.53  |
| SPC9_5  | 66.81            | 0.16             | 2.68                           | 0.91 | 0.77 | 0.87 | 6.70 | 18.08             | 0.56             | 0.14                          | 1.04 | 0.34            | -   | 0.14 | -                | 0.22                           | 0.22 | 99.63  |
| SPC9_6  | 66.83            | 0.11             | 2.53                           | 0.89 | 0.76 | 0.85 | 6.68 | 18.21             | 0.62             | 0.13                          | 1.07 | 0.33            | -   | 0.13 | 0.03             | 0.18                           | 0.19 | 99.53  |
| SPC9_7  | 66.76            | 0.18             | 2.56                           | 0.92 | 0.76 | 0.85 | 6.66 | 18.26             | 0.61             | 0.12                          | 1.03 | 0.29            | -   | 0.15 | -                | 0.24                           | 0.23 | 99.62  |
| SPC9_8  | 66.90            | 0.14             | 2.55                           | 0.82 | 0.74 | 0.85 | 6.55 | 18.37             | 0.71             | 0.12                          | 1.10 | 0.32            | -   | 0.15 | -                | 0.22                           | 0.19 | 99.73  |
| SPC9_9  | 67.13            | 0.21             | 2.50                           | 0.88 | 0.78 | 0.82 | 6.61 | 18.08             | 0.59             | 0.12                          | 1.10 | 0.30            | -   | 0.12 | -                | 0.25                           | 0.22 | 99.72  |
| SPC9_10 | 67.08            | 0.15             | 2.52                           | 0.86 | 0.70 | 0.93 | 6.92 | 17.93             | 0.69             | 0.17                          | 0.84 | 0.30            | -   | 0.15 | 0.01             | 0.19                           | 0.21 | 99.64  |
| SPC9_11 | 66.09            | 0.12             | 2.47                           | 0.84 | 0.77 | 1.04 | 7.71 | 18.50             | 0.61             | 0.37                          | 0.45 | 0.27            | -   | 0.13 | -                | 0.22                           | 0.22 | 99.79  |

(continued)

|          | SiO <sub>2</sub> | TiO <sub>2</sub> | Al <sub>2</sub> O <sub>3</sub> | FeO  | MnO  | MgO  | CaO  | Na <sub>2</sub> O | K <sub>2</sub> O | P <sub>2</sub> O <sub>5</sub> | Cl   | SO <sub>3</sub> | CoO | CuO  | SnO <sub>2</sub> | Sb <sub>2</sub> O <sub>5</sub> | PbO  | Total  |
|----------|------------------|------------------|--------------------------------|------|------|------|------|-------------------|------------------|-------------------------------|------|-----------------|-----|------|------------------|--------------------------------|------|--------|
| SPC10_1  | 70.66            | 0.03             | 2.93                           | 0.37 | 0.02 | 0.66 | 6.94 | 16.33             | 0.56             | 0.07                          | 0.99 | 0.18            | -   | -    | -                | -                              | -    | 99.73  |
| SPC10_2  | 70.54            | 0.14             | 3.00                           | 0.33 | 0.02 | 0.64 | 7.05 | 16.38             | 0.56             | 0.07                          | 0.97 | 0.17            | -   | -    | -                | -                              | -    | 99.87  |
| SPC10_3  | 70.73            | 0.08             | 2.93                           | 0.36 | -    | 0.60 | 7.01 | 16.38             | 0.54             | 0.05                          | 0.95 | 0.17            | -   | -    | -                | -                              | -    | 99.81  |
| SPC10_4  | 70.57            | 0.07             | 3.09                           | 0.36 | 0.01 | 0.58 | 7.12 | 16.26             | 0.56             | 0.05                          | 0.95 | 0.17            | -   | -    | -                | -                              | -    | 99.78  |
| SPC10_5  | 70.52            | 0.06             | 2.99                           | 0.38 | 0.01 | 0.59 | 7.16 | 16.36             | 0.56             | 0.01                          | 0.98 | 0.17            | -   | -    | -                | -                              | -    | 99.80  |
| SPC10_6  | 70.77            | 0.03             | 2.97                           | 0.39 | 0.01 | 0.64 | 7.07 | 16.31             | 0.54             | 0.05                          | 0.94 | 0.14            | -   | -    | -                | -                              | -    | 99.84  |
| SPC10_7  | 70.94            | 0.05             | 2.93                           | 0.32 | 0.03 | 0.66 | 7.08 | 16.08             | 0.57             | 0.05                          | 0.96 | 0.16            | -   | -    | -                | -                              | -    | 99.82  |
| SPC11_1  | 67.22            | 0.10             | 2.96                           | 0.75 | 0.17 | 0.92 | 8.43 | 17.10             | 0.65             | 0.17                          | 0.74 | 0.19            | -   | 0.14 | 0.04             | 0.11                           | 0.35 | 100.04 |
| SPC11_2  | 67.74            | 0.06             | 2.88                           | 0.68 | 0.17 | 0.90 | 8.48 | 16.57             | 0.69             | 0.10                          | 0.79 | 0.19            | -   | 0.11 | 0.04             | 0.09                           | 0.34 | 99.82  |
| SPC11_3  | 67.59            | 0.08             | 2.88                           | 0.73 | 0.18 | 0.93 | 8.46 | 16.76             | 0.68             | 0.12                          | 0.78 | 0.19            | -   | 0.08 | 0.05             | 0.10                           | 0.30 | 99.91  |
| SPC11_4  | 67.31            | 0.13             | 2.97                           | 0.75 | 0.17 | 0.93 | 8.66 | 16.67             | 0.64             | 0.13                          | 0.80 | 0.18            | -   | 0.12 | 0.04             | 0.12                           | 0.29 | 99.90  |
| SPC11_5  | 67.74            | 0.13             | 2.85                           | 0.67 | 0.19 | 0.87 | 8.50 | 16.60             | 0.65             | 0.16                          | 0.77 | 0.18            | -   | 0.13 | 0.02             | 0.12                           | 0.28 | 99.85  |
| SPC11_6  | 67.73            | 0.07             | 2.84                           | 0.67 | 0.20 | 0.88 | 8.48 | 16.80             | 0.63             | 0.17                          | 0.77 | 0.15            | -   | 0.11 | 0.03             | 0.12                           | 0.26 | 99.90  |
| SPC11_7  | 67.80            | 0.09             | 2.87                           | 0.73 | 0.20 | 0.83 | 8.58 | 16.48             | 0.68             | 0.14                          | 0.81 | 0.21            | -   | 0.08 | 0.03             | 0.09                           | 0.29 | 99.89  |
| SPC12_1  | 71.09            | 0.06             | 2.96                           | 0.38 | 0.01 | 0.61 | 6.71 | 16.18             | 0.52             | 0.07                          | 0.99 | 0.18            | -   | -    | -                | -                              | -    | 99.75  |
| SPC12_2  | 71.15            | 0.08             | 2.88                           | 0.42 | 0.02 | 0.61 | 6.80 | 16.17             | 0.54             | 0.08                          | 0.96 | 0.16            | -   | -    | -                | -                              | -    | 99.86  |
| SPC12_3  | 71.09            | 0.05             | 2.94                           | 0.39 | -    | 0.64 | 6.94 | 16.10             | 0.52             | 0.03                          | 0.97 | 0.16            | -   | -    | -                | -                              | -    | 99.82  |
| SPC12_4  | 71.19            | 0.08             | 2.92                           | 0.37 | 0.02 | 0.62 | 6.81 | 16.11             | 0.52             | 0.02                          | 0.98 | 0.19            | -   | -    | -                | -                              | -    | 99.82  |
| SPC12_5  | 70.84            | 0.09             | 2.98                           | 0.40 | 0.02 | 0.62 | 6.96 | 16.32             | 0.55             | 0.07                          | 0.91 | 0.17            | -   | -    | -                | -                              | -    | 99.91  |
| SPC12_6  | 70.99            | 0.07             | 2.93                           | 0.39 | 0.02 | 0.59 | 6.70 | 16.44             | 0.52             | 0.02                          | 0.97 | 0.17            | -   | -    | -                | -                              | -    | 99.80  |
| SPC12_7  | 70.96            | 0.12             | 3.01                           | 0.31 | 0.04 | 0.64 | 6.74 | 16.29             | 0.57             | 0.06                          | 0.94 | 0.17            | -   | -    | -                | -                              | -    | 99.84  |
| SPC12_8  | 70.68            | 0.04             | 2.96                           | 0.40 | 0.02 | 0.65 | 6.93 | 16.43             | 0.55             | 0.10                          | 0.95 | 0.19            | -   | -    | -                | -                              | -    | 99.91  |
| SPC13_1  | 66.18            | 0.12             | 1.52                           | 0.66 | 0.13 | 2.36 | 8.15 | 16.71             | 1.95             | 0.57                          | 0.81 | 0.25            | -   | -    | -                | -                              | -    | 99.41  |
| SPC13_2  | 65.22            | 0.16             | 1.60                           | 0.64 | 0.16 | 2.30 | 8.44 | 17.29             | 1.91             | 0.50                          | 0.81 | 0.21            | -   | -    | -                | -                              | -    | 99.23  |
| SPC13_3  | 66.23            | 0.15             | 1.60                           | 0.72 | 0.11 | 2.24 | 8.44 | 16.79             | 1.88             | 0.57                          | 0.76 | 0.23            | -   | -    | -                | -                              | -    | 99.71  |
| SPC13_4  | 66.05            | 0.13             | 1.57                           | 0.67 | 0.11 | 2.31 | 8.49 | 16.92             | 1.86             | 0.56                          | 0.79 | 0.22            | -   | -    | -                | -                              | -    | 99.68  |
| SPC13_5  | 66.13            | 0.14             | 1.56                           | 0.75 | 0.13 | 2.42 | 8.38 | 16.67             | 1.92             | 0.63                          | 0.81 | 0.25            | -   | -    | -                | -                              | -    | 99.80  |
| SPC13_6  | 66.03            | 0.15             | 1.46                           | 0.71 | 0.12 | 2.24 | 8.53 | 16.83             | 1.88             | 0.63                          | 0.80 | 0.25            | -   | -    | -                | -                              | -    | 99.64  |
| SPC13_7  | 65.68            | 0.15             | 1.63                           | 0.74 | 0.13 | 2.39 | 8.66 | 16.68             | 1.93             | 0.67                          | 0.79 | 0.25            | -   | -    | -                | -                              | -    | 99.69  |
| SPC13_8  | 65.85            | 0.18             | 1.55                           | 0.75 | 0.12 | 2.24 | 8.51 | 16.97             | 1.84             | 0.55                          | 0.82 | 0.31            | -   | -    | -                | -                              | -    | 99.69  |
| SPC14_1  | 71.33            | 0.04             | 2.94                           | 0.35 | 0.04 | 0.67 | 6.66 | 15.98             | 0.52             | 0.04                          | 0.99 | 0.18            | -   | -    | -                | -                              | -    | 99.73  |
| SPC14_2  | 71.89            | 0.03             | 2.89                           | 0.37 | 0.02 | 0.61 | 6.60 | 15.69             | 0.52             | 0.07                          | 0.94 | 0.16            | -   | -    | -                | -                              | -    | 99.78  |
| SPC14_3  | 71.69            | 0.06             | 2.90                           | 0.39 | 0.04 | 0.60 | 6.33 | 15.99             | 0.60             | 0.07                          | 0.97 | 0.18            | -   | -    | -                | -                              | -    | 99.80  |
| SPC14_4  | 71.51            | 0.10             | 2.90                           | 0.40 | -    | 0.64 | 6.45 | 16.02             | 0.54             | 0.04                          | 0.97 | 0.17            | -   | -    | -                | -                              | -    | 99.74  |
| SPC14_5  | 71.50            | 0.10             | 2.86                           | 0.32 | 0.03 | 0.58 | 6.73 | 16.01             | 0.52             | 0.08                          | 1.02 | 0.17            | -   | -    | -                | -                              | -    | 99.90  |
| SPC14_6  | 71.25            | 0.08             | 2.90                           | 0.33 | 0.01 | 0.64 | 6.50 | 16.14             | 0.54             | 0.07                          | 0.95 | 0.17            | -   | -    | -                | -                              | -    | 99.57  |
| SPC14_7  | 71.69            | 0.07             | 2.83                           | 0.35 | 0.01 | 0.64 | 6.41 | 15.97             | 0.52             | 0.05                          | 0.97 | 0.13            | -   | -    | -                | -                              | -    | 99.64  |
| SPC16_1  | 72.94            | 0.07             | 3.16                           | 0.46 | 0.03 | 0.54 | 6.59 | 14.43             | 0.60             | 0.05                          | 0.97 | 0.08            | -   | -    | -                | -                              | -    | 99.92  |
| SPC16_2  | 72.11            | 0.07             | 3.17                           | 0.49 | 0.04 | 0.92 | 6.57 | 14.75             | 0.69             | 0.11                          | 0.80 | 0.10            | -   | -    | -                | -                              | -    | 99.81  |
| SPC16_3  | 72.98            | 0.10             | 3.10                           | 0.46 | 0.03 | 0.46 | 6.61 | 14.53             | 0.64             | 0.08                          | 0.92 | 0.08            | -   | -    | -                | -                              | -    | 99.98  |
| SPC16_4  | 71.38            | 0.11             | 3.45                           | 0.67 | 0.03 | 0.94 | 6.89 | 14.71             | 0.62             | 0.09                          | 0.87 | 0.13            | -   | -    | -                | -                              | -    | 99.87  |
| SPC16_5  | 73.16            | 0.08             | 3.16                           | 0.43 | 0.02 | 0.49 | 6.51 | 14.19             | 0.62             | 0.08                          | 0.93 | 0.05            | -   | -    | -                | -                              | -    | 99.71  |
| SPC16_6  | 73.33            | 0.11             | 3.08                           | 0.40 | 0.02 | 0.46 | 6.68 | 14.13             | 0.56             | 0.07                          | 0.91 | 0.09            | -   | -    | -                | -                              | -    | 99.83  |
| SPC16_7  | 73.24            | 0.12             | 3.17                           | 0.45 | 0.03 | 0.49 | 6.45 | 14.29             | 0.52             | 0.04                          | 0.91 | 0.09            | -   | -    | -                | -                              | -    | 99.79  |
| SPC16_8  | 72.73            | 0.09             | 3.09                           | 0.46 | 0.04 | 0.57 | 6.68 | 14.35             | 0.66             | 0.05                          | 0.91 | 0.09            | -   | -    | -                | -                              | -    | 99.73  |
| SPC16_9  | 72.58            | 0.06             | 3.13                           | 0.53 | 0.02 | 0.48 | 6.50 | 14.80             | 0.60             | 0.10                          | 0.95 | 0.08            | -   | -    | -                | -                              | -    | 99.83  |
| SPC17_1  | 68.89            | 0.07             | 2.92                           | 0.70 | 0.24 | 0.94 | 8.08 | 15.78             | 0.79             | 0.14                          | 0.87 | 0.26            | -   | 0.06 | -                | -                              | 0.10 | 99.83  |
| SPC17_2  | 68.83            | 0.05             | 2.82                           | 0.59 | 0.20 | 0.91 | 8.14 | 16.03             | 0.81             | 0.16                          | 0.82 | 0.21            | -   | 0.04 | -                | -                              | 0.11 | 99.73  |
| SPC17_3  | 68.86            | 0.06             | 2.83                           | 0.65 | 0.25 | 1.04 | 8.06 | 15.92             | 0.71             | 0.13                          | 0.88 | 0.22            | -   | 0.07 | -                | -                              | 0.12 | 99.78  |
| SPC17_4  | 68.71            | 0.09             | 2.74                           | 0.66 | 0.22 | 1.09 | 7.84 | 16.05             | 0.81             | 0.16                          | 0.85 | 0.23            | -   | 0.04 | -                | -                              | 0.22 | 99.70  |
| SPC17_5  | 68.83            | 0.12             | 2.75                           | 0.69 | 0.20 | 0.95 | 8.13 | 15.85             | 0.78             | 0.14                          | 0.84 | 0.24            | -   | 0.05 | -                | -                              | 0.19 | 99.76  |
| SPC17_6  | 68.58            | 0.13             | 2.80                           | 0.65 | 0.23 | 0.96 | 8.02 | 16.14             | 0.85             | 0.15                          | 0.91 | 0.26            | -   | 0.02 | -                | -                              | 0.14 | 99.84  |
| SPC17_7  | 68.87            | 0.09             | 2.84                           | 0.68 | 0.21 | 1.00 | 7.99 | 15.83             | 0.78             | 0.18                          | 0.85 | 0.21            | -   | 0.08 | -                | -                              | 0.21 | 99.81  |
| SPC17_8  | 69.21            | 0.08             | 2.92                           | 0.57 | 0.23 | 0.85 | 7.76 | 15.95             | 0.79             | 0.16                          | 0.86 | 0.25            | -   | 0.07 | -                | -                              | 0.16 | 99.84  |
| SPC17_9  | 68.89            | 0.09             | 2.76                           | 0.60 | 0.21 | 0.94 | 8.05 | 15.91             | 0.80             | 0.18                          | 0.88 | 0.26            | -   | 0.08 | -                | -                              | 0.15 | 99.79  |
| SPC17_10 | 68.83            | 0.08             | 2.84                           | 0.70 | 0.20 | 0.90 | 7.79 | 16.05             | 0.73             | 0.12                          | 0.89 | 0.22            | -   | 0.03 | -                | -                              | 0.17 | 99.55  |
| SPC18D_1 | 67.70            | 0.09             | 2.94                           | 0.51 | 0.24 | 0.88 | 8.42 | 16.27             | 0.58             | 0.07                          | 0.87 | 0.17            | -   | 0.28 | 0.04             | 0.11                           | 0.70 | 99.88  |
| SPC18D_2 | 68.03            | 0.06             | 2.93                           | 0.58 | 0.20 | 0.92 | 8.24 | 15.85             | 0.72             | 0.15                          | 0.82 | 0.17            | -   | 0.27 | -                | 0.12                           | 0.77 | 99.82  |
| SPC18D_3 | 67.56            | 0.06             | 2.96                           | 0.59 | 0.28 | 0.88 | 7.97 | 16.30             | 0.61             | 0.06                          | 0.78 | 0.19            | -   | 0.26 | -                | 0.10                           | 0.75 | 99.33  |
| SPC18D_4 | 67.18            | 0.05             | 2.91                           | 0.58 | 0.21 | 0.82 | 8.32 | 16.33             | 0.70             | 0.12                          | 0.85 | 0.18            | -   | 0.32 | 0.07             | 0.08                           | 0.57 | 99.27  |

(continued)

|              | SiO <sub>2</sub> | TiO <sub>2</sub> | Al <sub>2</sub> O <sub>3</sub> | FeO  | MnO  | MgO  | CaO   | Na <sub>2</sub> O | K <sub>2</sub> O | P <sub>2</sub> O <sub>5</sub> | Cl   | SO <sub>3</sub> | CoO  | CuO  | SnO <sub>2</sub> | Sb <sub>2</sub> O <sub>5</sub> | PbO  | Total  |
|--------------|------------------|------------------|--------------------------------|------|------|------|-------|-------------------|------------------|-------------------------------|------|-----------------|------|------|------------------|--------------------------------|------|--------|
| SPC18L_1     | 66.41            | 0.10             | 2.81                           | 0.74 | 0.37 | 0.86 | 8.73  | 15.98             | 0.59             | 0.19                          | 0.82 | 0.28            | -    | 0.27 | 0.39             | 0.10                           | 1.74 | 100.37 |
| SPC18L_2     | 66.06            | 0.09             | 2.69                           | 0.71 | 0.46 | 0.90 | 8.21  | 15.69             | 0.65             | 0.14                          | 0.87 | 0.22            | -    | 0.28 | 0.30             | 0.08                           | 2.13 | 99.46  |
| SPC18L_3     | 65.66            | 0.11             | 2.73                           | 0.87 | 0.48 | 0.94 | 8.12  | 15.99             | 0.58             | 0.10                          | 0.90 | 0.29            | -    | 0.29 | 0.43             | 0.08                           | 2.28 | 99.84  |
| SPC18L_4     | 65.43            | 0.05             | 2.71                           | 0.95 | 0.48 | 0.86 | 7.93  | 16.02             | 0.60             | 0.12                          | 0.92 | 0.24            | -    | 0.29 | 0.29             | 0.11                           | 2.09 | 99.10  |
| SPC18L_5     | 66.51            | 0.10             | 2.80                           | 0.84 | 0.41 | 0.97 | 7.91  | 16.01             | 0.70             | 0.14                          | 0.90 | 0.21            | -    | 0.23 | 0.23             | 0.10                           | 1.97 | 100.02 |
| SPC18L_6     | 65.83            | 0.09             | 2.73                           | 0.91 | 0.41 | 0.91 | 8.35  | 15.83             | 0.68             | 0.18                          | 0.83 | 0.26            | -    | 0.23 | 0.42             | 0.08                           | 1.88 | 99.61  |
| SPC18L_7     | 63.95            | 0.11             | 2.59                           | 0.90 | 0.53 | 0.90 | 8.10  | 16.14             | 0.56             | 0.11                          | 0.84 | 0.26            | -    | 0.34 | 0.42             | 0.08                           | 2.26 | 98.08  |
| SPC18L_8     | 65.29            | 0.10             | 2.73                           | 0.93 | 0.44 | 0.90 | 8.27  | 15.97             | 0.59             | 0.13                          | 0.89 | 0.26            | -    | 0.26 | 0.42             | 0.08                           | 1.94 | 99.19  |
| SPC19_1      | 65.87            | 0.06             | 2.85                           | 0.42 | 0.04 | 0.98 | 10.49 | 17.26             | 0.84             | 0.05                          | 0.74 | 0.15            | -    | -    | -                | -                              | -    | 99.75  |
| SPC19_2      | 65.88            | 0.05             | 2.75                           | 0.38 | 0.02 | 1.06 | 10.21 | 17.41             | 0.84             | 0.08                          | 0.81 | 0.16            | -    | -    | -                | -                              | -    | 99.64  |
| SPC19_3      | 65.83            | 0.12             | 2.87                           | 0.34 | -    | 1.08 | 10.37 | 17.44             | 0.76             | 0.01                          | 0.76 | 0.18            | -    | -    | -                | -                              | -    | 99.74  |
| SPC19_4      | 65.90            | 0.11             | 2.80                           | 0.37 | 0.02 | 1.00 | 10.33 | 17.58             | 0.75             | 0.07                          | 0.72 | 0.16            | -    | -    | -                | -                              | -    | 99.81  |
| SPC19_5      | 65.70            | 0.10             | 2.71                           | 0.36 | 0.01 | 1.05 | 10.42 | 17.39             | 1.01             | 0.04                          | 0.76 | 0.16            | -    | -    | -                | -                              | -    | 99.72  |
| SPC19_6      | 66.27            | -                | 2.79                           | 0.36 | 0.02 | 1.00 | 10.15 | 17.25             | 0.85             | 0.04                          | 0.71 | 0.18            | -    | -    | -                | -                              | -    | 99.62  |
| SPC20_1      | 69.17            | 0.07             | 3.22                           | 0.32 | 0.01 | 1.06 | 9.47  | 13.57             | 1.34             | 0.03                          | 0.90 | 0.11            | -    | -    | -                | -                              | -    | 99.28  |
| SPC20_2      | 69.02            | -                | 3.26                           | 0.29 | 0.02 | 1.07 | 9.68  | 13.28             | 1.70             | 0.07                          | 0.92 | 0.10            | -    | -    | -                | -                              | -    | 99.39  |
| SPC20_3      | 68.88            | 0.01             | 3.17                           | 0.37 | 0.01 | 1.10 | 9.78  | 13.38             | 1.68             | 0.06                          | 0.89 | 0.10            | -    | -    | -                | -                              | -    | 99.43  |
| SPC20_4      | 68.92            | -                | 3.23                           | 0.43 | 0.02 | 1.07 | 9.41  | 13.34             | 1.92             | 0.03                          | 0.86 | 0.11            | -    | -    | -                | -                              | -    | 99.33  |
| SPC20_5      | 68.84            | 0.06             | 3.10                           | 0.37 | 0.03 | 0.99 | 9.58  | 12.89             | 2.20             | 0.05                          | 0.93 | 0.10            | -    | -    | -                | -                              | -    | 99.14  |
| SPC20_6      | 68.96            | 0.09             | 3.08                           | 0.40 | -    | 1.00 | 9.58  | 12.85             | 2.21             | 0.06                          | 0.92 | 0.11            | -    | -    | -                | -                              | -    | 99.26  |
| SPC21D_1     | 65.32            | 0.16             | 2.70                           | 1.89 | 0.72 | 1.73 | 7.03  | 16.46             | 0.86             | 0.19                          | 0.91 | 0.30            | -    | 0.36 | 0.14             | 0.27                           | 0.81 | 99.84  |
| SPC21D_2     | 65.71            | 0.20             | 2.61                           | 1.67 | 0.70 | 1.66 | 6.83  | 16.38             | 0.89             | 0.17                          | 0.95 | 0.35            | -    | 0.40 | 0.17             | 0.31                           | 0.81 | 99.79  |
| SPC21D_3     | 66.11            | 0.13             | 2.64                           | 1.09 | 0.72 | 1.25 | 7.21  | 17.06             | 0.83             | 0.15                          | 0.88 | 0.31            | -    | 0.44 | 0.13             | 0.27                           | 0.63 | 99.85  |
| SPC21D_4     | 65.91            | 0.23             | 2.47                           | 1.22 | 0.81 | 1.21 | 7.22  | 17.05             | 0.79             | 0.16                          | 0.79 | 0.30            | -    | 0.51 | 0.15             | 0.33                           | 0.73 | 99.88  |
| SPC21D_5     | 65.31            | 0.10             | 2.67                           | 1.40 | 0.71 | 2.26 | 7.26  | 16.63             | 0.77             | 0.21                          | 0.62 | 0.26            | -    | 0.45 | 0.13             | 0.28                           | 0.62 | 99.67  |
| SPC21D_6     | 63.64            | 0.13             | 2.66                           | 3.60 | 0.73 | 2.00 | 5.15  | 16.76             | 0.72             | 0.21                          | 0.81 | 0.28            | -    | 0.40 | 0.15             | 0.26                           | 1.03 | 98.53  |
| SPC21D_7     | 62.85            | 0.14             | 2.74                           | 3.83 | 0.72 | 2.15 | 6.86  | 16.11             | 0.74             | 0.20                          | 0.80 | 0.27            | -    | 0.36 | 0.16             | 0.36                           | 1.05 | 99.36  |
| SPC21D_8     | 65.60            | 0.19             | 2.54                           | 1.25 | 0.72 | 1.41 | 7.30  | 17.03             | 0.87             | 0.20                          | 0.79 | 0.31            | -    | 0.42 | 0.16             | 0.34                           | 0.70 | 99.81  |
| SPC21L_1     | 62.51            | 0.13             | 2.69                           | 3.40 | 0.72 | 1.99 | 6.65  | 17.06             | 0.81             | 0.20                          | 0.81 | 0.28            | -    | 0.61 | 0.19             | 0.28                           | 1.33 | 99.66  |
| SPC21L_2     | 64.07            | 0.18             | 2.60                           | 3.09 | 0.68 | 2.06 | 6.30  | 16.32             | 0.78             | 0.15                          | 0.80 | 0.28            | -    | 0.50 | 0.16             | 0.29                           | 1.51 | 99.78  |
| SPC21L_3     | 62.63            | 0.07             | 2.63                           | 3.68 | 0.69 | 2.40 | 6.67  | 16.20             | 0.76             | 0.17                          | 0.81 | 0.28            | -    | 0.52 | 0.25             | 0.36                           | 1.49 | 99.60  |
| SPC21L_4     | 62.65            | 0.17             | 2.76                           | 3.57 | 0.72 | 2.73 | 6.43  | 16.06             | 0.78             | 0.22                          | 0.81 | 0.27            | -    | 0.46 | 0.21             | 0.27                           | 1.46 | 99.56  |
| SPC21L_5     | 61.60            | 0.18             | 2.81                           | 5.03 | 0.64 | 2.14 | 6.69  | 16.16             | 0.72             | 0.24                          | 0.84 | 0.17            | -    | 0.25 | 0.20             | 0.28                           | 1.55 | 99.50  |
| SPC21L_6     | 62.94            | 0.17             | 2.79                           | 3.11 | 0.74 | 2.71 | 6.60  | 16.06             | 0.73             | 0.25                          | 0.88 | 0.27            | -    | 0.34 | 0.18             | 0.28                           | 1.16 | 99.20  |
| SPC21L_7     | 62.02            | 0.20             | 2.88                           | 3.98 | 0.70 | 2.38 | 6.68  | 16.35             | 0.71             | 0.26                          | 0.82 | 0.27            | -    | 0.39 | 0.17             | 0.32                           | 1.29 | 99.41  |
| SPC21L_8     | 63.21            | 0.09             | 2.80                           | 3.26 | 0.69 | 2.55 | 6.56  | 15.94             | 0.74             | 0.20                          | 0.89 | 0.32            | -    | 0.37 | 0.17             | 0.33                           | 1.34 | 99.44  |
| SPC21L_9     | 62.81            | 0.19             | 2.76                           | 3.97 | 0.72 | 1.94 | 6.77  | 16.25             | 0.79             | 0.18                          | 0.86 | 0.15            | -    | 0.40 | 0.25             | 0.29                           | 1.37 | 99.70  |
| SPC21L_10    | 62.16            | 0.12             | 2.66                           | 5.33 | 0.68 | 1.92 | 6.45  | 15.66             | 0.76             | 0.23                          | 0.83 | 0.21            | -    | 0.58 | 0.13             | 0.27                           | 1.74 | 99.72  |
| SPC21L_11    | 62.21            | 0.16             | 2.69                           | 5.00 | 0.68 | 2.01 | 6.48  | 15.52             | 0.75             | 0.18                          | 0.78 | 0.21            | -    | 0.80 | 0.24             | 0.29                           | 1.43 | 99.43  |
| SPC22blue_1  | 62.22            | 0.36             | 2.95                           | 2.75 | 1.60 | 1.23 | 5.05  | 18.97             | 0.40             | 0.04                          | 1.21 | 0.33            | 0.18 | 0.84 | -                | -                              | 1.53 | 99.65  |
| SPC22blue_2  | 62.03            | 0.28             | 2.91                           | 2.88 | 1.65 | 1.25 | 5.20  | 19.01             | 0.40             | 0.05                          | 1.19 | 0.28            | 0.17 | 0.76 | -                | -                              | 1.31 | 99.37  |
| SPC22blue_3  | 61.95            | 0.29             | 2.96                           | 2.86 | 1.63 | 1.23 | 5.23  | 18.99             | 0.38             | 0.04                          | 1.22 | 0.36            | 0.16 | 0.70 | -                | -                              | 1.40 | 99.40  |
| SPC22blue_4  | 62.05            | 0.32             | 3.00                           | 2.88 | 1.52 | 1.23 | 4.99  | 19.05             | 0.41             | 0.07                          | 1.24 | 0.33            | 0.15 | 0.87 | -                | -                              | 1.56 | 99.65  |
| SPC22blue_5  | 62.55            | 0.36             | 2.91                           | 2.81 | 1.63 | 1.29 | 4.99  | 18.77             | 0.37             | 0.06                          | 1.16 | 0.32            | 0.17 | 0.88 | -                | -                              | 1.87 | 100.14 |
| SPC22blue_6  | 62.25            | 0.29             | 2.95                           | 2.80 | 1.58 | 1.20 | 5.03  | 19.23             | 0.37             | 0.06                          | 1.15 | 0.32            | 0.16 | 0.73 | -                | -                              | 1.28 | 99.39  |
| SPC22blue_7  | 62.21            | 0.35             | 2.89                           | 2.92 | 1.63 | 1.26 | 5.16  | 18.85             | 0.42             | 0.04                          | 1.14 | 0.31            | 0.13 | 0.79 | -                | -                              | 1.22 | 99.30  |
| SPC22green_1 | 65.25            | 0.37             | 2.93                           | 1.24 | 1.52 | 1.30 | 4.84  | 20.26             | 0.34             | 0.04                          | 1.37 | 0.31            | -    | -    | -                | -                              | -    | 99.76  |
| SPC22green_2 | 65.13            | 0.37             | 2.87                           | 1.22 | 1.54 | 1.29 | 4.93  | 20.40             | 0.35             | 0.03                          | 1.39 | 0.33            | -    | -    | -                | -                              | -    | 99.87  |
| SPC22green_3 | 65.41            | 0.35             | 2.82                           | 1.24 | 1.58 | 1.31 | 4.66  | 20.42             | 0.37             | 0.05                          | 1.37 | 0.37            | -    | -    | -                | -                              | -    | 99.95  |
| SPC22green_4 | 65.37            | 0.36             | 2.85                           | 1.11 | 1.54 | 1.26 | 4.69  | 20.59             | 0.38             | 0.06                          | 1.35 | 0.36            | -    | -    | -                | -                              | -    | 99.92  |
| SPC22green_5 | 65.44            | 0.37             | 2.79                           | 1.18 | 1.58 | 1.18 | 4.84  | 20.41             | 0.36             | 0.04                          | 1.35 | 0.34            | -    | -    | -                | -                              | -    | 99.89  |
| SPC22green_6 | 65.27            | 0.43             | 2.88                           | 1.18 | 1.57 | 1.18 | 4.86  | 20.49             | 0.31             | 0.04                          | 1.31 | 0.33            | -    | -    | -                | -                              | -    | 99.85  |
| SPC22green_7 | 65.19            | 0.41             | 2.85                           | 1.28 | 1.63 | 1.17 | 4.75  | 20.48             | 0.34             | 0.04                          | 1.34 | 0.31            | -    | -    | -                | -                              | -    | 99.80  |
| SPC22green_8 | 65.58            | 0.39             | 2.86                           | 1.23 | 1.58 | 1.23 | 4.76  | 20.31             | 0.36             | 0.05                          | 1.35 | 0.30            | -    | -    | -                | -                              | -    | 99.98  |
| SPC22green_9 | 65.05            | 0.35             | 2.96                           | 1.23 | 1.46 | 1.28 | 4.72  | 20.76             | 0.33             | 0.05                          | 1.38 | 0.34            | -    | -    | -                | -                              | -    | 99.88  |
| SPC23D_1     | 65.42            | 0.12             | 1.86                           | 0.68 | 0.51 | 0.55 | 5.84  | 19.07             | 0.46             | 0.08                          | 1.04 | 0.32            | 0.02 | 0.15 | -                | 0.91                           | 0.21 | 97.23  |
| SPC23D_2     | 68.59            | 0.12             | 2.19                           | 0.93 | 0.42 | 0.49 | 6.00  | 17.86             | 0.55             | 0.10                          | 1.09 | 0.34            | 0.04 | 0.16 | -                | 1.05                           | 0.28 | 100.20 |
| SPC23D_3     | 68.68            | 0.05             | 2.14                           | 0.75 | 0.45 | 0.51 | 5.22  | 18.11             | 0.48             | 0.08                          | 1.00 | 0.38            | 0.05 | 0.12 | -                | 1.21                           | 0.27 | 99.48  |
| SPC23D_4     | 67.32            | -                | 2.20                           | 0.73 | 0.45 | 0.47 | 6.06  | 18.05             | 0.47             | 0.08                          | 1.08 | 0.40            | 0.05 | 0.16 | -                | 1.55                           | 0.37 | 99.41  |
| SPC23D_5     | 68.22            | 0.11             | 2.19                           | 0.81 | 0.41 | 0.59 | 5.81  | 18.08             | 0.48             | 0.06                          | 1.17 | 0.34            | 0.05 | 0.10 | -                | 1.23                           | 0.34 | 99.99  |
| SPC23D_6     | 68.13            | 0.16             | 2.16                           | 0.83 | 0.45 | 0.59 | 6.04  | 17.79             | 0.55             | 0.12                          | 1.10 | 0.35            | 0.05 | 0.16 | -                | 0.98                           | 0.43 | 99.90  |
| SPC23D_7     | 68.68            | 0.08             | 1.99                           | 0.74 | 0.47 | 0.53 | 5.86  | 18.16             | 0.56             | 0.07                          | 1.15 | 0.36            | 0.06 | 0.17 | -                | 1.28                           | 0.33 | 100.48 |
| SPC23D_8     | 67.88            | 0.12             | 2.09                           | 0.81 | 0.49 | 0.52 | 5.94  | 18.08             | 0.48             | 0.08                          | 1.09 | 0.40            | 0.06 | 0.19 | -                | 1.05                           | 0.42 | 99.70  |
| SPC23D_9     | 67.56            | 0.05             | 2.29                           | 1.00 | 0.41 | 0.57 | 6.14  | 18.02             | 0.46             | 0.08                          | 1.13 | 0.36            | 0.08 | 0.13 | -                | 1.39                           | 0.34 | 100.01 |
| SPC23D_10    | 68.30            | 0.08             | 2.02                           | 0.73 | 0.48 | 0.53 | 5.99  | 17.95             | 0.49             | 0.08                          | 1.09 | 0.34            | 0.08 | 0.13 | -                | 0.97                           | 0.42 | 99.66  |

(continued)

|          | SiO <sub>2</sub> | TiO <sub>2</sub> | Al <sub>2</sub> O <sub>3</sub> | FeO  | MnO  | MgO  | CaO   | Na <sub>2</sub> O | K <sub>2</sub> O | P <sub>2</sub> O <sub>5</sub> | Cl   | SO <sub>3</sub> | CoO  | CuO  | SnO <sub>2</sub> | Sb <sub>2</sub> O <sub>5</sub> | PbO  | Total |
|----------|------------------|------------------|--------------------------------|------|------|------|-------|-------------------|------------------|-------------------------------|------|-----------------|------|------|------------------|--------------------------------|------|-------|
| SPC23L_1 | 68.21            | 0.05             | 2.35                           | 0.94 | 0.88 | 0.46 | 5.64  | 16.80             | 0.51             | 0.20                          | 0.82 | 0.42            | 0.09 | 0.11 | -                | 1.15                           | 0.69 | 99.31 |
| SPC23L_2 | 67.69            | 0.06             | 2.45                           | 1.04 | 0.46 | 0.59 | 5.58  | 17.92             | 0.53             | 0.16                          | 0.80 | 0.50            | 0.10 | 0.15 | -                | 1.33                           | 0.36 | 99.71 |
| SPC23L_3 | 67.86            | 0.03             | 2.41                           | 0.89 | 0.81 | 0.54 | 5.91  | 17.41             | 0.48             | 0.24                          | 0.92 | 0.42            | 0.11 | 0.15 | -                | 1.41                           | 0.05 | 99.62 |
| SPC23L_4 | 66.61            | 0.08             | 2.37                           | 0.97 | 0.77 | 0.56 | 6.92  | 16.44             | 0.55             | 0.17                          | 0.82 | 0.45            | 0.14 | 0.14 | -                | 1.68                           | 0.86 | 99.52 |
| SPC23L_5 | 67.61            | 0.03             | 2.24                           | 0.89 | 0.75 | 0.50 | 6.03  | 16.54             | 0.57             | 0.17                          | 0.74 | 0.44            | 0.15 | 0.13 | -                | 1.27                           | 0.62 | 98.69 |
| SPC23L_6 | 67.82            | 0.00             | 2.65                           | 1.14 | 0.41 | 0.61 | 6.36  | 16.84             | 0.47             | 0.22                          | 0.60 | 0.55            | 0.23 | 0.12 | -                | 1.07                           | 0.54 | 99.60 |
| SPC24D_1 | 71.29            | 0.06             | 2.66                           | 0.31 | 0.03 | 0.52 | 6.99  | 15.88             | 0.58             | 0.10                          | 1.12 | 0.18            | -    | 0.06 | 0.01             | 0.05                           | 0.01 | 99.84 |
| SPC24D_2 | 71.43            | 0.05             | 2.65                           | 0.34 | 0.04 | 0.51 | 6.95  | 15.49             | 0.64             | 0.18                          | 1.06 | 0.15            | -    | 0.18 | 0.06             | 0.02                           | -    | 99.74 |
| SPC24D_3 | 69.75            | 0.08             | 2.63                           | 0.35 | 0.06 | 0.63 | 7.75  | 16.28             | 0.52             | 0.18                          | 1.06 | 0.18            | -    | 0.24 | 0.04             | 0.06                           | -    | 99.79 |
| SPC24D_4 | 70.56            | 0.07             | 2.62                           | 0.31 | 0.05 | 0.54 | 6.85  | 15.85             | 0.54             | 0.15                          | 1.12 | 0.20            | -    | 0.18 | 0.07             | 0.04                           | 0.08 | 99.23 |
| SPC24D_5 | 70.52            | 0.08             | 2.84                           | 0.49 | 0.12 | 0.59 | 7.02  | 15.90             | 0.58             | 0.15                          | 1.10 | 0.19            | -    | 0.08 | 0.05             | 0.07                           | 0.05 | 99.82 |
| SPC24D_6 | 70.92            | 0.05             | 2.83                           | 0.32 | 0.03 | 0.59 | 6.84  | 16.03             | 0.56             | 0.13                          | 1.08 | 0.18            | -    | 0.09 | 0.03             | 0.06                           | -    | 99.71 |
| SPC24L_1 | 68.95            | 0.03             | 2.58                           | 0.34 | 0.08 | 0.56 | 6.99  | 15.37             | 0.50             | 0.12                          | 1.04 | 0.18            | -    | 1.41 | 0.08             | 0.49                           | 0.99 | 99.73 |
| SPC24L_2 | 68.83            | 0.06             | 2.65                           | 0.40 | 0.07 | 0.59 | 6.63  | 15.64             | 0.47             | 0.11                          | 1.05 | 0.16            | -    | 1.29 | 0.13             | 0.55                           | 0.97 | 99.60 |
| SPC24L_3 | 68.58            | 0.06             | 2.62                           | 0.42 | 0.46 | 0.54 | 7.32  | 14.64             | 0.67             | 0.16                          | 0.94 | 0.28            | -    | 1.50 | 0.15             | 0.62                           | 0.07 | 99.02 |
| SPC24L_4 | 68.90            | 0.07             | 2.50                           | 0.33 | 0.42 | 0.54 | 7.03  | 15.45             | 0.65             | 0.14                          | 0.99 | 0.21            | -    | 1.39 | 0.10             | 0.32                           | 0.03 | 99.08 |
| SPC24L_5 | 66.28            | 0.01             | 1.51                           | 0.33 | 0.05 | 0.44 | 5.36  | 21.34             | 0.36             | 0.12                          | 0.87 | 0.23            | -    | 0.99 | 0.09             | 0.52                           | 0.96 | 99.45 |
| SPC24L_6 | 68.92            | 0.04             | 2.57                           | 0.29 | 0.04 | 0.58 | 6.70  | 15.84             | 0.53             | 0.13                          | 1.08 | 0.18            | -    | 1.09 | 0.10             | 0.40                           | 0.97 | 99.46 |
| SPC24L_7 | 68.89            | 0.05             | 2.60                           | 0.43 | 0.04 | 0.55 | 6.79  | 15.31             | 0.52             | 0.12                          | 1.08 | 0.19            | -    | 1.40 | 0.10             | 0.47                           | 1.08 | 99.61 |
| SPC24L_8 | 69.01            | 0.05             | 2.62                           | 0.37 | 0.07 | 0.49 | 6.92  | 15.47             | 0.55             | 0.14                          | 1.06 | 0.18            | -    | 1.17 | 0.10             | 0.63                           | 0.90 | 99.73 |
| SPC24L_9 | 68.99            | 0.06             | 2.56                           | 0.35 | 0.07 | 0.57 | 6.83  | 15.39             | 0.52             | 0.11                          | 1.10 | 0.18            | -    | 1.18 | 0.12             | 0.34                           | 0.97 | 99.33 |
| SPC25_1  | 64.68            | 0.10             | 2.41                           | 0.97 | 1.65 | 1.09 | 8.00  | 18.80             | 0.68             | 0.12                          | 0.93 | 0.40            | -    | -    | -                | 0.01                           | -    | 99.83 |
| SPC25_2  | 64.83            | 0.10             | 2.33                           | 0.89 | 1.65 | 1.10 | 8.06  | 18.49             | 0.68             | 0.12                          | 1.02 | 0.41            | -    | -    | -                | 0.06                           | -    | 99.73 |
| SPC25_3  | 64.69            | 0.08             | 2.50                           | 0.83 | 1.70 | 1.10 | 8.11  | 18.44             | 0.67             | 0.09                          | 1.02 | 0.36            | -    | -    | -                | 0.04                           | -    | 99.61 |
| SPC25_4  | 64.57            | 0.16             | 2.39                           | 0.90 | 1.67 | 1.10 | 8.10  | 18.82             | 0.59             | 0.08                          | 0.94 | 0.35            | -    | -    | -                | 0.03                           | -    | 99.70 |
| SPC25_5  | 64.34            | 0.13             | 2.27                           | 0.80 | 1.52 | 1.11 | 7.79  | 19.15             | 0.65             | 0.13                          | 0.97 | 0.37            | -    | -    | -                | 0.03                           | -    | 99.26 |
| SPC25_6  | 64.33            | 0.13             | 2.44                           | 0.83 | 1.54 | 1.11 | 8.11  | 18.76             | 0.62             | 0.08                          | 0.94 | 0.40            | -    | -    | -                | 0.04                           | -    | 99.33 |
| SPC26_1  | 62.82            | 0.20             | 2.58                           | 0.98 | 1.84 | 1.30 | 8.23  | 19.58             | 0.70             | 0.10                          | 0.98 | 0.42            | -    | -    | -                | -                              | -    | 99.71 |
| SPC26_2  | 62.40            | 0.14             | 2.59                           | 1.09 | 1.88 | 1.36 | 8.17  | 19.67             | 0.64             | 0.11                          | 0.98 | 0.42            | -    | -    | -                | -                              | -    | 99.46 |
| SPC26_3  | 63.43            | 0.16             | 2.52                           | 0.97 | 1.65 | 1.21 | 7.73  | 19.76             | 0.63             | 0.11                          | 1.00 | 0.45            | -    | -    | -                | -                              | -    | 99.60 |
| SPC26_4  | 62.58            | 0.17             | 2.59                           | 0.92 | 1.85 | 1.34 | 7.99  | 20.00             | 0.64             | 0.16                          | 1.00 | 0.44            | -    | -    | -                | -                              | -    | 99.66 |
| SPC26_5  | 62.49            | 0.17             | 2.64                           | 1.09 | 1.81 | 1.33 | 8.39  | 19.61             | 0.69             | 0.15                          | 1.04 | 0.40            | -    | -    | -                | -                              | -    | 99.81 |
| SPC26_6  | 62.92            | 0.18             | 2.55                           | 1.06 | 1.70 | 1.30 | 7.79  | 19.98             | 0.64             | 0.14                          | 1.01 | 0.42            | -    | -    | -                | -                              | -    | 99.68 |
| SPC26_7  | 63.62            | 0.14             | 2.49                           | 0.87 | 1.72 | 1.24 | 7.52  | 19.95             | 0.62             | 0.11                          | 1.04 | 0.39            | -    | -    | -                | -                              | -    | 99.70 |
| SPC27_1  | 70.05            | 0.05             | 3.09                           | 0.36 | 0.03 | 0.76 | 9.01  | 14.65             | 0.44             | 0.07                          | 0.88 | 0.12            | -    | -    | -                | -                              | 0.05 | 99.56 |
| SPC27_2  | 70.27            | 0.01             | 3.09                           | 0.44 | 0.04 | 0.73 | 8.76  | 14.51             | 0.47             | 0.06                          | 0.93 | 0.13            | -    | -    | -                | -                              | 0.07 | 99.50 |
| SPC27_3  | 70.14            | 0.08             | 3.08                           | 0.43 | 0.03 | 0.80 | 9.03  | 14.39             | 0.48             | 0.09                          | 0.87 | 0.11            | -    | -    | -                | -                              | 0.04 | 99.56 |
| SPC27_4  | 70.54            | 0.10             | 3.14                           | 0.37 | 0.03 | 0.74 | 8.88  | 14.27             | 0.49             | 0.05                          | 0.92 | 0.12            | -    | -    | -                | -                              | 0.08 | 99.71 |
| SPC27_5  | 70.38            | 0.05             | 3.18                           | 0.40 | 0.04 | 0.81 | 9.04  | 14.05             | 0.47             | 0.09                          | 0.94 | 0.10            | -    | -    | -                | -                              | 0.03 | 99.58 |
| SPC27_6  | 70.41            | 0.03             | 3.11                           | 0.37 | 0.03 | 0.76 | 8.91  | 14.38             | 0.54             | 0.04                          | 0.92 | 0.12            | -    | -    | -                | -                              | 0.04 | 99.64 |
| SPC27_7  | 70.57            | 0.12             | 3.14                           | 0.37 | 0.03 | 0.76 | 8.99  | 13.99             | 0.46             | 0.05                          | 0.90 | 0.11            | -    | -    | -                | -                              | 0.05 | 99.52 |
| SPC27_8  | 70.64            | 0.06             | 3.08                           | 0.30 | 0.02 | 0.75 | 9.01  | 14.14             | 0.46             | 0.07                          | 0.91 | 0.10            | -    | -    | -                | -                              | 0.03 | 99.57 |
| SPC27_9  | 70.13            | 0.11             | 3.10                           | 0.42 | 0.05 | 0.79 | 9.00  | 14.29             | 0.46             | 0.05                          | 0.92 | 0.13            | -    | -    | -                | -                              | 0.04 | 99.47 |
| SPC29_1  | 68.87            | 0.09             | 3.21                           | 0.81 | 0.08 | 2.41 | 8.91  | 14.02             | 0.73             | 0.26                          | 0.26 | 0.09            | -    | -    | -                | -                              | 0.02 | 99.76 |
| SPC29_2  | 66.56            | 0.12             | 3.73                           | 1.16 | 0.06 | 2.59 | 9.51  | 13.88             | 0.66             | 0.15                          | 0.62 | 0.14            | -    | -    | -                | -                              | 0.03 | 99.22 |
| SPC29_3  | 67.92            | 0.10             | 3.87                           | 1.19 | 0.05 | 2.29 | 9.16  | 13.57             | 0.72             | 0.32                          | 0.11 | 0.07            | -    | 0.01 | -                | 0.02                           | 0.06 | 99.46 |
| SPC29_4  | 67.52            | 0.08             | 3.68                           | 0.94 | 0.06 | 2.05 | 9.53  | 14.33             | 0.72             | 0.12                          | 0.45 | 0.10            | -    | -    | -                | -                              | 0.02 | 99.61 |
| SPC29_5  | 70.05            | 0.04             | 3.14                           | 0.45 | 0.09 | 1.03 | 8.99  | 13.97             | 0.75             | 0.06                          | 0.69 | 0.12            | -    | -    | -                | -                              | 0.02 | 99.40 |
| SPC29_6  | 70.33            | 0.13             | 3.05                           | 0.51 | 0.08 | 0.83 | 8.98  | 14.10             | 0.69             | 0.06                          | 0.73 | 0.09            | -    | -    | -                | -                              | 0.03 | 99.60 |
| SPC29_7  | 69.06            | 0.07             | 3.14                           | 0.79 | 0.08 | 1.79 | 8.99  | 13.88             | 0.70             | 0.11                          | 0.68 | 0.12            | -    | -    | -                | -                              | 0.02 | 99.42 |
| SPC29_8  | 66.71            | 0.15             | 4.06                           | 0.68 | 0.09 | 1.64 | 10.11 | 14.05             | 0.67             | 0.71                          | 0.45 | 0.09            | -    | 0.01 | -                | 0.01                           | 0.06 | 99.47 |
| SPC29_9  | 67.02            | 0.05             | 3.69                           | 0.66 | 0.08 | 1.50 | 9.82  | 14.12             | 0.71             | 0.29                          | 0.34 | 0.11            | -    | 0.02 | -                | 0.01                           | 0.07 | 98.47 |
| SPC31_1  | 63.53            | 0.15             | 2.90                           | 1.03 | 0.24 | 1.18 | 7.64  | 20.38             | 0.68             | 0.15                          | 0.99 | 0.56            | 0.02 | 0.07 | -                | 0.02                           | 0.24 | 99.77 |
| SPC31_2  | 64.16            | 0.14             | 2.85                           | 1.09 | 0.24 | 1.11 | 7.48  | 19.89             | 0.64             | 0.17                          | 1.00 | 0.54            | 0.02 | 0.10 | -                | 0.03                           | 0.27 | 99.72 |
| SPC31_3  | 63.74            | 0.25             | 2.74                           | 1.15 | 0.23 | 1.20 | 7.65  | 20.00             | 0.70             | 0.16                          | 1.02 | 0.50            | 0.02 | 0.09 | -                | 0.02                           | 0.25 | 99.70 |
| SPC31_4  | 63.60            | 0.17             | 2.87                           | 1.11 | 0.24 | 1.12 | 7.67  | 20.32             | 0.66             | 0.15                          | 1.02 | 0.53            | 0.03 | 0.11 | -                | 0.04                           | 0.32 | 99.96 |
| SPC31_5  | 63.89            | 0.19             | 2.80                           | 1.07 | 0.20 | 1.11 | 7.52  | 20.11             | 0.71             | 0.14                          | 1.02 | 0.47            | 0.05 | 0.14 | -                | 0.02                           | 0.31 | 99.76 |
| SPC31_6  | 63.72            | 0.15             | 2.71                           | 1.05 | 0.19 | 1.17 | 7.57  | 20.45             | 0.65             | 0.19                          | 0.94 | 0.54            | 0.04 | 0.12 | -                | 0.02                           | 0.28 | 99.79 |
| SPC31_7  | 63.43            | 0.19             | 2.82                           | 1.00 | 0.20 | 1.22 | 7.59  | 20.45             | 0.66             | 0.15                          | 0.99 | 0.49            | 0.04 | 0.12 | -                | 0.03                           | 0.29 | 99.68 |
| SPC31_8  | 63.69            | 0.15             | 2.74                           | 1.12 | 0.20 | 1.07 | 7.57  | 20.37             | 0.65             | 0.15                          | 0.99 | 0.53            | 0.06 | 0.15 | -                | 0.04                           | 0.34 | 99.83 |

(continued)

|          | SiO <sub>2</sub> | TiO <sub>2</sub> | Al <sub>2</sub> O <sub>3</sub> | FeO  | MnO  | MgO  | CaO   | Na <sub>2</sub> O | K <sub>2</sub> O | P <sub>2</sub> O <sub>5</sub> | Cl   | SO <sub>3</sub> | CoO | CuO  | SnO <sub>2</sub> | Sb <sub>2</sub> O <sub>5</sub> | PbO  | Total  |
|----------|------------------|------------------|--------------------------------|------|------|------|-------|-------------------|------------------|-------------------------------|------|-----------------|-----|------|------------------|--------------------------------|------|--------|
| SPC32_1  | 71.58            | 0.13             | 3.00                           | 0.33 | 0.02 | 0.65 | 6.48  | 16.20             | 0.51             | 0.06                          | 0.93 | 0.17            | -   | -    | -                | -                              | -    | 100.04 |
| SPC32_2  | 71.84            | 0.08             | 2.95                           | 0.32 | 0.03 | 0.58 | 6.47  | 16.07             | 0.58             | 0.05                          | 0.88 | 0.18            | -   | -    | -                | -                              | -    | 100.01 |
| SPC32_3  | 71.73            | 0.10             | 2.96                           | 0.37 | 0.01 | 0.62 | 6.43  | 16.16             | 0.50             | 0.03                          | 0.95 | 0.20            | -   | -    | -                | -                              | -    | 100.05 |
| SPC32_4  | 71.78            | 0.01             | 2.97                           | 0.35 | 0.01 | 0.60 | 6.61  | 16.09             | 0.49             | 0.04                          | 0.94 | 0.19            | -   | -    | -                | -                              | -    | 100.07 |
| SPC32_5  | 71.85            | 0.05             | 2.89                           | 0.31 | 0.03 | 0.61 | 6.45  | 16.27             | 0.54             | 0.07                          | 0.90 | 0.16            | -   | -    | -                | -                              | -    | 100.11 |
| SPC32_6  | 71.64            | 0.08             | 2.96                           | 0.35 | 0.03 | 0.67 | 6.43  | 16.23             | 0.53             | 0.06                          | 0.91 | 0.19            | -   | -    | -                | -                              | -    | 100.08 |
| SPC32_7  | 71.72            | 0.07             | 2.91                           | 0.37 | 0.02 | 0.61 | 6.40  | 16.32             | 0.55             | 0.06                          | 0.93 | 0.19            | -   | -    | -                | -                              | -    | 100.14 |
| SPC32_8  | 71.70            | 0.03             | 2.95                           | 0.37 | 0.02 | 0.65 | 6.42  | 16.20             | 0.55             | 0.05                          | 0.93 | 0.17            | -   | -    | -                | -                              | -    | 100.04 |
| SPC33_1  | 64.48            | 0.14             | 2.50                           | 0.93 | 1.86 | 1.36 | 8.89  | 17.25             | 0.77             | 0.14                          | 0.82 | 0.42            | -   | -    | -                | -                              | -    | 99.56  |
| SPC33_2  | 64.07            | 0.13             | 2.53                           | 0.84 | 1.86 | 1.27 | 8.97  | 17.80             | 0.79             | 0.16                          | 0.77 | 0.46            | -   | -    | -                | -                              | -    | 99.65  |
| SPC33_3  | 64.32            | 0.19             | 2.49                           | 0.85 | 1.89 | 1.24 | 8.72  | 17.82             | 0.71             | 0.17                          | 0.79 | 0.47            | -   | -    | -                | -                              | -    | 99.65  |
| SPC33_4  | 64.17            | 0.18             | 2.53                           | 0.95 | 1.84 | 1.23 | 8.76  | 17.69             | 0.80             | 0.17                          | 0.81 | 0.44            | -   | -    | -                | -                              | -    | 99.57  |
| SPC33_5  | 63.46            | 0.12             | 2.56                           | 0.82 | 1.85 | 1.23 | 8.68  | 18.30             | 0.76             | 0.18                          | 0.85 | 0.46            | -   | -    | -                | -                              | -    | 99.27  |
| SPC33_6  | 64.38            | 0.16             | 2.46                           | 0.81 | 1.76 | 1.24 | 8.83  | 17.90             | 0.76             | 0.14                          | 0.84 | 0.46            | -   | -    | -                | -                              | -    | 99.73  |
| SPC33_7  | 64.40            | 0.20             | 2.44                           | 0.84 | 1.78 | 1.24 | 8.97  | 17.66             | 0.77             | 0.17                          | 0.78 | 0.47            | -   | -    | -                | -                              | -    | 99.71  |
| SPC33_8  | 64.52            | 0.12             | 2.42                           | 0.87 | 1.86 | 1.22 | 8.67  | 17.74             | 0.71             | 0.19                          | 0.81 | 0.42            | -   | -    | -                | -                              | -    | 99.55  |
| SPC34_1  | 63.75            | 0.16             | 2.32                           | 0.84 | 1.18 | 1.01 | 7.02  | 19.87             | 0.61             | 0.26                          | 1.05 | 0.47            | -   | 0.19 | 0.41             | -                              | 0.97 | 100.11 |
| SPC34_2  | 63.76            | 0.13             | 2.43                           | 0.78 | 1.11 | 1.01 | 6.99  | 19.78             | 0.61             | 0.19                          | 1.05 | 0.46            | -   | 0.20 | 0.33             | -                              | 0.84 | 99.66  |
| SPC34_3  | 63.41            | 0.10             | 2.37                           | 0.91 | 1.07 | 0.98 | 7.03  | 19.74             | 0.61             | 0.26                          | 1.08 | 0.48            | -   | 0.21 | 0.23             | -                              | 0.84 | 99.31  |
| SPC34_4  | 63.91            | 0.14             | 2.39                           | 0.79 | 1.08 | 1.00 | 6.97  | 19.89             | 0.62             | 0.26                          | 1.06 | 0.41            | -   | 0.13 | 0.25             | -                              | 0.77 | 99.67  |
| SPC34_5  | 63.54            | 0.14             | 2.36                           | 0.80 | 1.10 | 1.03 | 6.96  | 20.06             | 0.63             | 0.22                          | 1.07 | 0.50            | -   | 0.22 | 0.29             | -                              | 0.91 | 99.81  |
| SPC34_6  | 63.92            | 0.12             | 2.40                           | 0.90 | 1.18 | 1.00 | 7.01  | 19.70             | 0.61             | 0.30                          | 1.04 | 0.44            | -   | 0.18 | 0.26             | 0.01                           | 0.76 | 99.82  |
| SPC34_7  | 64.09            | 0.09             | 2.35                           | 0.76 | 1.11 | 0.98 | 6.82  | 19.86             | 0.63             | 0.23                          | 1.05 | 0.46            | -   | 0.17 | 0.36             | 0.02                           | 0.93 | 99.90  |
| SPC35_1  | 70.97            | 0.07             | 2.60                           | 0.28 | 0.25 | 0.43 | 7.07  | 15.98             | 0.51             | 0.13                          | 1.18 | 0.16            | -   | -    | -                | 0.06                           | -    | 99.68  |
| SPC35_2  | 71.40            | 0.05             | 2.56                           | 0.23 | 0.19 | 0.44 | 6.93  | 15.99             | 0.41             | 0.17                          | 1.13 | 0.18            | -   | -    | -                | 0.04                           | -    | 99.71  |
| SPC35_3  | 71.23            | -                | 2.65                           | 0.33 | 0.24 | 0.46 | 6.95  | 16.00             | 0.48             | 0.14                          | 1.15 | 0.16            | -   | -    | -                | 0.04                           | -    | 99.83  |
| SPC35_4  | 71.42            | 0.06             | 2.68                           | 0.26 | 0.22 | 0.43 | 6.94  | 15.93             | 0.41             | 0.11                          | 1.20 | 0.17            | -   | -    | -                | 0.04                           | -    | 99.87  |
| SPC35_5  | 71.21            | -                | 2.63                           | 0.31 | 0.22 | 0.42 | 7.05  | 16.00             | 0.44             | 0.14                          | 1.24 | 0.16            | -   | -    | -                | 0.03                           | -    | 99.85  |
| SPC35_6  | 71.04            | 0.02             | 2.61                           | 0.29 | 0.25 | 0.46 | 7.03  | 15.99             | 0.58             | 0.16                          | 1.16 | 0.18            | -   | -    | -                | 0.07                           | -    | 99.84  |
| SPC35_7  | 71.19            | 0.08             | 2.63                           | 0.26 | 0.24 | 0.45 | 6.98  | 15.99             | 0.46             | 0.10                          | 1.22 | 0.15            | -   | -    | -                | 0.03                           | -    | 99.78  |
| SPC35_8  | 71.10            | 0.07             | 2.66                           | 0.29 | 0.19 | 0.40 | 6.85  | 15.98             | 0.58             | 0.18                          | 1.25 | 0.15            | -   | -    | -                | 0.05                           | -    | 99.75  |
| SPC36_1  | 68.62            | 0.16             | 1.88                           | 0.64 | -    | 0.49 | 8.35  | 17.96             | 0.31             | 0.11                          | 1.27 | 0.20            | -   | -    | -                | -                              | -    | 99.97  |
| SPC36_2  | 69.05            | 0.15             | 1.91                           | 0.59 | 0.02 | 0.46 | 8.18  | 17.87             | 0.33             | 0.09                          | 1.25 | 0.18            | -   | -    | -                | -                              | -    | 100.06 |
| SPC36_3  | 68.70            | 0.16             | 1.90                           | 0.66 | 0.03 | 0.49 | 8.24  | 17.96             | 0.31             | 0.11                          | 1.29 | 0.20            | -   | -    | -                | -                              | -    | 100.03 |
| SPC36_4  | 68.80            | 0.16             | 1.95                           | 0.67 | 0.02 | 0.56 | 8.21  | 17.78             | 0.26             | 0.14                          | 1.21 | 0.17            | -   | -    | -                | -                              | -    | 99.92  |
| SPC36_5  | 68.61            | 0.19             | 1.93                           | 0.67 | -    | 0.49 | 8.34  | 18.14             | 0.29             | 0.10                          | 1.19 | 0.20            | -   | -    | -                | -                              | -    | 100.14 |
| SPC36_6  | 68.88            | 0.20             | 1.90                           | 0.62 | -    | 0.49 | 8.30  | 17.88             | 0.32             | 0.11                          | 1.24 | 0.16            | -   | -    | -                | -                              | -    | 100.11 |
| SPC36_7  | 69.06            | 0.10             | 1.94                           | 0.56 | -    | 0.46 | 8.19  | 17.98             | 0.26             | 0.08                          | 1.21 | 0.15            | -   | -    | -                | -                              | -    | 99.98  |
| SPC36_8  | 69.00            | 0.20             | 1.89                           | 0.63 | 0.03 | 0.50 | 8.07  | 18.00             | 0.30             | 0.09                          | 1.21 | 0.19            | -   | -    | -                | -                              | -    | 100.10 |
| SPC37_1  | 66.75            | 0.03             | 1.34                           | 0.66 | 0.30 | 3.43 | 10.17 | 12.31             | 2.59             | 0.35                          | 0.87 | 0.15            | -   | 0.26 | -                | -                              | 0.04 | 99.25  |
| SPC37_2  | 66.85            | 0.04             | 1.46                           | 0.61 | 0.30 | 3.36 | 9.99  | 12.40             | 2.67             | 0.29                          | 0.82 | 0.18            | -   | 0.19 | -                | -                              | 0.06 | 99.21  |
| SPC37_3  | 67.09            | 0.06             | 1.37                           | 0.63 | 0.30 | 3.42 | 10.09 | 12.14             | 2.64             | 0.36                          | 0.80 | 0.15            | -   | 0.21 | -                | -                              | 0.02 | 99.27  |
| SPC37_4  | 67.20            | 0.07             | 1.31                           | 0.65 | 0.31 | 3.26 | 10.08 | 12.05             | 2.69             | 0.40                          | 0.88 | 0.19            | -   | 0.23 | -                | -                              | 0.05 | 99.35  |
| SPC37_5  | 66.84            | 0.07             | 1.37                           | 0.63 | 0.31 | 3.40 | 10.27 | 12.13             | 2.63             | 0.38                          | 0.84 | 0.17            | -   | 0.20 | -                | -                              | 0.03 | 99.27  |
| SPC37_6  | 67.18            | 0.06             | 1.36                           | 0.65 | 0.27 | 3.28 | 10.20 | 12.05             | 2.70             | 0.41                          | 0.83 | 0.18            | -   | 0.23 | -                | -                              | 0.02 | 99.40  |
| SPC37_7  | 67.12            | 0.11             | 1.39                           | 0.58 | 0.27 | 3.32 | 10.16 | 12.12             | 2.70             | 0.34                          | 0.88 | 0.19            | -   | 0.17 | -                | -                              | 0.06 | 99.39  |
| SPC37_8  | 67.36            | 0.06             | 0.89                           | 0.59 | 0.31 | 3.34 | 10.08 | 12.21             | 2.60             | 0.36                          | 0.86 | 0.15            | -   | 0.21 | -                | -                              | 0.04 | 99.07  |
| SPC37_9  | 66.93            | 0.14             | 1.36                           | 0.64 | 0.32 | 3.43 | 10.05 | 12.07             | 2.71             | 0.36                          | 0.86 | 0.20            | -   | 0.21 | -                | -                              | 0.04 | 99.30  |
| SPC37_10 | 67.14            | 0.09             | 1.36                           | 0.64 | 0.30 | 3.43 | 10.35 | 11.87             | 2.68             | 0.40                          | 0.90 | 0.17            | -   | 0.18 | -                | -                              | 0.02 | 99.53  |
| SPC38D_1 | 69.64            | 0.08             | 2.56                           | 0.37 | 0.69 | 0.59 | 7.21  | 16.49             | 0.84             | 0.13                          | 1.06 | 0.14            | -   | 0.12 | -                | 0.05                           | 0.11 | 100.06 |
| SPC38D_2 | 68.02            | 0.11             | 2.77                           | 0.80 | 0.46 | 0.79 | 7.27  | 16.88             | 0.84             | 0.16                          | 0.97 | 0.30            | -   | 0.04 | -                | 0.05                           | 0.09 | 99.53  |
| SPC38D_3 | 68.85            | 0.06             | 3.14                           | 0.40 | 1.21 | 0.64 | 7.26  | 15.73             | 0.93             | 0.08                          | 1.00 | 0.14            | -   | 0.09 | -                | 0.07                           | 0.10 | 99.67  |
| SPC38D_4 | 69.88            | 0.09             | 2.92                           | 0.75 | 0.37 | 0.83 | 6.41  | 16.42             | 0.75             | 0.09                          | 0.58 | 0.22            | -   | 0.10 | -                | 0.09                           | 0.10 | 99.59  |
| SPC38D_5 | 69.29            | 0.12             | 2.93                           | 0.82 | 0.50 | 0.97 | 6.96  | 15.72             | 1.03             | 0.15                          | 0.53 | 0.32            | -   | 0.05 | -                | 0.11                           | 0.08 | 99.58  |
| SPC38L_1 | 67.08            | 0.11             | 2.41                           | 1.22 | 0.58 | 0.98 | 6.72  | 17.26             | 0.75             | 0.12                          | 0.97 | 0.29            | -   | 0.18 | 0.03             | 1.03                           | 0.25 | 100.00 |
| SPC38L_2 | 67.79            | 0.13             | 2.71                           | 0.91 | 0.68 | 0.90 | 7.26  | 17.02             | 0.85             | 0.14                          | 0.88 | 0.29            | -   | 0.08 | 0.05             | 0.18                           | 0.14 | 99.99  |
| SPC38L_3 | 67.64            | 0.13             | 2.71                           | 0.99 | 0.54 | 0.89 | 6.77  | 17.44             | 0.92             | 0.14                          | 0.96 | 0.31            | -   | 0.13 | 0.07             | 0.23                           | 0.25 | 100.11 |
| SPC38L_4 | 66.97            | 0.13             | 2.56                           | 0.93 | 0.57 | 0.86 | 6.39  | 17.90             | 0.74             | 0.11                          | 1.04 | 0.36            | -   | 0.19 | 0.06             | 0.86                           | 0.38 | 100.04 |
| SPC38L_5 | 67.94            | 0.10             | 2.90                           | 0.79 | 0.49 | 0.86 | 6.58  | 17.70             | 0.72             | 0.11                          | 0.94 | 0.29            | -   | 0.13 | 0.05             | 0.17                           | 0.12 | 99.91  |

(continued)

|           | SiO <sub>2</sub> | TiO <sub>2</sub> | Al <sub>2</sub> O <sub>3</sub> | FeO  | MnO  | MgO  | CaO  | Na <sub>2</sub> O | K <sub>2</sub> O | P <sub>2</sub> O <sub>5</sub> | Cl   | SO <sub>3</sub> | CoO | CuO  | SnO <sub>2</sub> | Sb <sub>2</sub> O <sub>5</sub> | PbO  | Total  |
|-----------|------------------|------------------|--------------------------------|------|------|------|------|-------------------|------------------|-------------------------------|------|-----------------|-----|------|------------------|--------------------------------|------|--------|
| SPC39_1   | 66.46            | 0.16             | 2.64                           | 0.93 | 0.61 | 1.10 | 7.88 | 17.56             | 0.92             | 0.21                          | 0.72 | 0.32            | -   | 0.04 | -                | 0.03                           | 0.06 | 99.61  |
| SPC39_2   | 66.37            | 0.14             | 2.75                           | 0.90 | 0.66 | 1.12 | 8.16 | 17.24             | 0.96             | 0.21                          | 0.73 | 0.31            | -   | 0.02 | -                | 0.03                           | 0.06 | 99.67  |
| SPC39_3   | 67.09            | 0.14             | 2.59                           | 0.87 | 0.64 | 1.26 | 7.61 | 17.16             | 0.88             | 0.16                          | 0.73 | 0.29            | -   | 0.05 | -                | 0.04                           | 0.08 | 99.58  |
| SPC39_4   | 66.93            | 0.09             | 2.58                           | 0.89 | 0.57 | 1.18 | 8.15 | 17.23             | 0.86             | 0.15                          | 0.65 | 0.26            | -   | 0.04 | -                | 0.02                           | 0.06 | 99.65  |
| SPC39_5   | 66.55            | 0.17             | 2.70                           | 0.88 | 0.61 | 1.32 | 7.69 | 17.54             | 0.91             | 0.16                          | 0.75 | 0.30            | -   | 0.03 | -                | 0.02                           | 0.06 | 99.67  |
| SPC39_6   | 66.52            | 0.15             | 2.70                           | 0.95 | 0.61 | 1.08 | 7.96 | 17.42             | 0.94             | 0.18                          | 0.77 | 0.31            | -   | 0.02 | -                | 0.02                           | 0.09 | 99.72  |
| SPC39_7   | 66.54            | 0.16             | 2.54                           | 0.95 | 0.70 | 1.35 | 7.76 | 17.34             | 0.89             | 0.20                          | 0.76 | 0.29            | -   | 0.03 | -                | 0.03                           | 0.08 | 99.62  |
| SPC39_8   | 66.79            | 0.12             | 2.63                           | 1.00 | 0.57 | 1.35 | 7.93 | 17.03             | 0.94             | 0.24                          | 0.62 | 0.25            | -   | 0.05 | -                | 0.03                           | 0.03 | 99.58  |
| SPC39_9   | 66.70            | 0.13             | 2.60                           | 0.97 | 0.59 | 1.09 | 7.64 | 17.53             | 0.93             | 0.28                          | 0.76 | 0.30            | -   | 0.02 | -                | 0.02                           | 0.07 | 99.62  |
| SPC39_10  | 66.75            | 0.09             | 2.59                           | 0.93 | 0.61 | 1.15 | 7.68 | 17.36             | 1.01             | 0.16                          | 0.77 | 0.31            | -   | 0.03 | -                | 0.02                           | 0.06 | 99.53  |
| SPC39_11  | 66.48            | 0.14             | 2.54                           | 0.85 | 0.58 | 1.17 | 7.62 | 17.46             | 1.03             | 0.21                          | 0.80 | 0.29            | -   | 0.02 | -                | 0.02                           | 0.06 | 99.25  |
| SPC39_12  | 66.44            | 0.18             | 2.68                           | 0.95 | 0.62 | 1.09 | 7.57 | 17.56             | 0.98             | 0.20                          | 0.75 | 0.28            | -   | 0.03 | -                | 0.04                           | 0.05 | 99.42  |
| SPC39_13  | 66.35            | 0.16             | 2.63                           | 0.89 | 0.56 | 1.17 | 7.73 | 17.70             | 0.99             | 0.18                          | 0.74 | 0.29            | -   | 0.05 | -                | 0.02                           | 0.07 | 99.54  |
| SPC40_1   | 67.07            | 0.07             | 2.75                           | 0.77 | 0.55 | 0.96 | 7.88 | 16.66             | 0.68             | 0.12                          | 0.91 | 0.25            | -   | 0.16 | 0.10             | 0.12                           | 0.83 | 99.89  |
| SPC40_2   | 66.78            | 0.17             | 2.72                           | 0.78 | 0.55 | 1.08 | 7.86 | 16.87             | 0.64             | 0.14                          | 0.88 | 0.25            | -   | 0.14 | 0.16             | 0.11                           | 0.74 | 99.86  |
| SPC40_3   | 66.37            | 0.14             | 2.81                           | 0.81 | 0.60 | 1.00 | 7.89 | 17.20             | 0.71             | 0.17                          | 0.87 | 0.25            | -   | 0.16 | 0.14             | 0.05                           | 0.77 | 99.93  |
| SPC40_4   | 66.74            | 0.12             | 2.72                           | 0.82 | 0.58 | 1.03 | 7.83 | 16.88             | 0.68             | 0.14                          | 0.87 | 0.27            | -   | 0.13 | 0.17             | 0.05                           | 0.79 | 99.82  |
| SPC40_5   | 66.89            | 0.15             | 2.77                           | 0.86 | 0.56 | 1.08 | 7.82 | 16.81             | 0.71             | 0.15                          | 0.82 | 0.24            | -   | 0.15 | 0.11             | 0.07                           | 0.71 | 99.90  |
| SPC40_6   | 66.46            | 0.08             | 2.85                           | 0.76 | 0.54 | 0.99 | 7.79 | 16.90             | 0.71             | 0.13                          | 0.88 | 0.26            | -   | 0.16 | 0.13             | 0.11                           | 0.79 | 99.54  |
| SPC40_7   | 66.64            | 0.10             | 2.70                           | 0.73 | 0.58 | 1.01 | 7.85 | 16.99             | 0.66             | 0.15                          | 0.88 | 0.28            | -   | 0.13 | 0.19             | 0.11                           | 0.71 | 99.72  |
| SPC9F_1   | 66.11            | 0.17             | 2.67                           | 1.01 | 0.63 | 1.00 | 6.70 | 17.64             | 0.71             | 0.18                          | 0.96 | 0.31            | -   | 0.12 | 1.27             | -                              | 0.58 | 100.07 |
| SPC9F_2   | 66.23            | 0.07             | 2.58                           | 0.99 | 0.67 | 1.15 | 6.72 | 17.67             | 0.69             | 0.19                          | 0.95 | 0.29            | -   | 0.10 | 1.14             | 0.02                           | 0.55 | 100.00 |
| SPC9F_3   | 66.28            | 0.08             | 2.64                           | 1.05 | 0.65 | 1.04 | 6.58 | 17.61             | 0.70             | 0.17                          | 1.00 | 0.28            | -   | 0.15 | 1.25             | -                              | 0.57 | 100.06 |
| SPC9F_4   | 66.32            | 0.11             | 2.64                           | 1.02 | 0.65 | 1.07 | 6.64 | 17.50             | 0.77             | 0.14                          | 0.91 | 0.30            | -   | 0.11 | 1.30             | 0.02                           | 0.59 | 100.09 |
| SPC16F_1  | 71.16            | 0.14             | 3.02                           | 0.47 | 0.02 | 0.59 | 6.82 | 14.25             | 0.69             | 0.10                          | 0.88 | 0.08            | -   | -    | 0.51             | 0.04                           | 1.04 | 99.80  |
| SPC16F_2  | 70.49            | 0.07             | 2.99                           | 1.55 | 0.02 | 0.51 | 6.59 | 14.19             | 0.72             | 0.06                          | 0.82 | 0.09            | -   | -    | 0.68             | 0.05                           | 0.99 | 99.80  |
| SPC16F_3  | 71.94            | 0.06             | 3.10                           | 0.43 | 0.03 | 0.52 | 6.54 | 13.60             | 0.79             | 0.09                          | 0.85 | 0.09            | -   | -    | 0.64             | 0.06                           | 1.14 | 99.87  |
| SPC16F_4  | 71.97            | 0.13             | 2.99                           | 0.56 | 0.02 | 0.45 | 6.36 | 13.53             | 0.83             | 0.07                          | 0.86 | 0.09            | -   | -    | 0.71             | 0.03                           | 1.12 | 99.71  |
| SPC16F_5  | 71.02            | 0.02             | 3.03                           | 1.01 | 0.03 | 0.54 | 6.43 | 14.07             | 0.66             | 0.08                          | 0.87 | 0.08            | -   | -    | 0.57             | 0.05                           | 1.11 | 99.57  |
| SPC16F_6  | 71.62            | 0.04             | 2.96                           | 0.36 | 0.02 | 0.56 | 6.67 | 14.13             | 0.70             | 0.01                          | 0.90 | 0.06            | -   | -    | 0.54             | 0.04                           | 1.07 | 99.68  |
| SPC16F_7  | 66.73            | 0.08             | 2.83                           | 5.50 | 0.03 | 0.46 | 5.80 | 14.50             | 0.68             | 0.08                          | 0.85 | 0.11            | -   | -    | 0.79             | 0.04                           | 0.97 | 99.46  |
| SPC16F_8  | 71.17            | 0.05             | 2.99                           | 0.49 | 0.02 | 0.53 | 6.59 | 14.13             | 0.83             | 0.11                          | 0.80 | 0.10            | -   | -    | 0.85             | 0.02                           | 1.04 | 99.73  |
| SPC17F_1  | 63.76            | 0.12             | 2.73                           | 0.63 | 0.19 | 0.88 | 7.53 | 14.09             | 0.82             | 0.06                          | 0.81 | 0.23            | -   | 0.21 | 4.51             | -                              | 3.37 | 99.94  |
| SPC17F_2  | 63.78            | 0.13             | 2.69                           | 0.71 | 0.19 | 0.91 | 7.56 | 14.17             | 0.83             | 0.12                          | 0.77 | 0.22            | -   | 0.11 | 4.63             | -                              | 2.86 | 99.68  |
| SPC17F_3  | 63.82            | 0.07             | 2.75                           | 0.72 | 0.18 | 0.95 | 7.44 | 14.24             | 0.92             | 0.12                          | 0.81 | 0.23            | -   | 0.07 | 4.37             | -                              | 3.06 | 99.73  |
| SPC17F_4  | 63.16            | 0.10             | 3.10                           | 0.70 | 0.17 | 0.88 | 7.48 | 14.10             | 0.85             | 0.13                          | 0.78 | 0.23            | -   | 0.09 | 4.64             | -                              | 3.56 | 99.95  |
| SPC17F_5  | 63.30            | 0.06             | 2.64                           | 0.80 | 0.21 | 0.94 | 7.42 | 14.41             | 0.81             | 0.11                          | 0.76 | 0.24            | -   | 0.09 | 3.99             | -                              | 3.01 | 98.80  |
| SPC17F_6  | 63.47            | 0.06             | 2.83                           | 0.72 | 0.20 | 0.89 | 7.87 | 14.35             | 0.90             | 0.14                          | 0.80 | 0.21            | -   | 0.13 | 4.01             | -                              | 3.33 | 99.91  |
| SPC17F_7  | 63.46            | 0.10             | 2.73                           | 0.72 | 0.20 | 0.96 | 7.60 | 14.44             | 0.88             | 0.13                          | 0.80 | 0.22            | -   | 0.14 | 4.04             | -                              | 3.24 | 99.65  |
| SPC17F_8  | 63.72            | 0.02             | 2.68                           | 0.71 | 0.19 | 0.93 | 7.39 | 14.14             | 0.82             | 0.15                          | 0.81 | 0.25            | -   | 0.10 | 4.16             | -                              | 3.78 | 99.85  |
| SPC17F_9  | 63.33            | 0.13             | 2.79                           | 0.88 | 0.20 | 0.93 | 7.55 | 14.36             | 0.84             | 0.10                          | 0.76 | 0.22            | -   | 0.16 | 4.19             | -                              | 3.41 | 99.85  |
| SPC17F_10 | 63.63            | 0.10             | 2.63                           | 0.72 | 0.17 | 0.87 | 7.44 | 14.46             | 0.79             | 0.13                          | 0.74 | 0.20            | -   | 0.15 | 3.59             | -                              | 3.52 | 99.15  |
| SPC39F_1  | 65.55            | 0.15             | 2.67                           | 0.94 | 0.59 | 1.07 | 7.84 | 17.30             | 0.95             | 0.17                          | 0.75 | 0.30            | -   | -    | 1.22             | 0.01                           | 0.59 | 100.08 |
| SPC39F_2  | 65.84            | 0.12             | 2.61                           | 0.96 | 0.58 | 1.18 | 7.75 | 17.19             | 0.94             | 0.14                          | 0.76 | 0.28            | -   | -    | 1.22             | -                              | 0.61 | 100.16 |
| SPC39F_3  | 65.81            | 0.18             | 2.55                           | 0.95 | 0.60 | 1.15 | 7.66 | 17.30             | 0.89             | 0.18                          | 0.78 | 0.29            | -   | -    | 1.16             | -                              | 0.55 | 100.05 |
| SPC39F_4  | 65.63            | 0.14             | 2.54                           | 0.96 | 0.59 | 1.11 | 7.67 | 17.37             | 0.91             | 0.20                          | 0.75 | 0.30            | -   | 0.01 | 1.28             | 0.01                           | 0.65 | 100.12 |
| SPC39F_5  | 64.12            | 0.08             | 5.33                           | 0.86 | 0.54 | 1.13 | 7.34 | 16.70             | 0.88             | 0.21                          | 0.71 | 0.29            | -   | -    | 1.33             | -                              | 0.56 | 100.07 |
| SPC40F_1  | 66.77            | 0.11             | 2.51                           | 0.77 | 0.53 | 1.17 | 7.34 | 16.75             | 0.70             | 0.20                          | 0.89 | 0.32            | -   | 0.10 | 0.18             | 0.62                           | 0.70 | 99.65  |
| SPC40F_2  | 66.59            | 0.05             | 2.63                           | 0.83 | 0.51 | 1.13 | 7.40 | 16.79             | 0.73             | 0.15                          | 0.93 | 0.28            | -   | 0.15 | 0.11             | 0.58                           | 0.68 | 99.53  |
| SPC40F_3  | 66.74            | 0.08             | 2.56                           | 0.79 | 0.51 | 1.21 | 7.44 | 16.67             | 0.70             | 0.16                          | 0.88 | 0.28            | -   | 0.13 | 0.12             | 0.62                           | 0.70 | 99.57  |
| SPC40F_4  | 66.78            | 0.09             | 2.58                           | 0.80 | 0.56 | 1.18 | 7.45 | 16.86             | 0.68             | 0.14                          | 0.89 | 0.29            | -   | 0.10 | 0.12             | 0.51                           | 0.70 | 99.72  |
| SPC40F_5  | 66.73            | 0.16             | 2.41                           | 0.79 | 0.49 | 1.13 | 7.49 | 16.84             | 0.74             | 0.16                          | 0.86 | 0.31            | -   | 0.15 | 0.11             | 0.62                           | 0.70 | 99.66  |

Table S4. LA-ICP-MS: full data set. All values in ppm.

| Sample | SPC 1   | SPC 1  | SPC 1  | SPC 2  | SPC 2  | SPC 2  | SPC 2  | SPC 3  | SPC 3  | SPC 3  | SPC 4  | SPC 4  | SPC 4  | SPC 5  | SPC 5  |
|--------|---------|--------|--------|--------|--------|--------|--------|--------|--------|--------|--------|--------|--------|--------|--------|
| Li     | 5.86    | 5.43   | 5.68   | 7.66   | 7.64   | 7.13   | 7.72   | 5.77   | 6.94   | 6.34   | 6.21   | 6.2    | 5.99   | 7.34   | 7.71   |
| Be     | 0.56    | 0.107  | 0.24   | 0.37   | 0.36   | 0.37   | 0.34   | 0.47   | 0.42   | 0.39   | 0.4    | 0.077  | 0.39   | 0.28   | 0.62   |
| B      | 159.7   | 148.1  | 155.7  | 155.1  | 151.7  | 150.6  | 145.6  | 146.8  | 150.0  | 145.4  | 173.3  | 175.8  | 175.4  | 179.0  | 185.0  |
| Sc     | 2.4     | 2.4    | 2.2    | 3.0    | 3.2    | 3.0    | 2.8    | 2.5    | 2.4    | 2.3    | 2.2    | 2.2    | 2.2    | 2.9    | 2.8    |
| Ti     | 881     | 873    | 835    | 816    | 853    | 823    | 858    | 890    | 898    | 864    | 701    | 710    | 713    | 957    | 948    |
| V      | 25      | 25     | 24     | 28     | 28     | 28     | 28     | 25     | 24     | 24     | 22     | 24     | 23     | 53     | 53     |
| Cr     | 17      | 16     | 15     | 15     | 15     | 16     | 15     | 17     | 15     | 17     | 13     | 13     | 13     | 17     | 17     |
| Co     | 6       | 6      | 6      | 7      | 7      | 7      | 7      | 6      | 5      | 5      | 46     | 46     | 48     | 26     | 26     |
| Ni     | 10      | 10     | 9      | 10     | 10     | 9      | 9      | 8      | 8      | 8      | 21     | 21     | 20     | 28     | 27     |
| Cu     | 40      | 39     | 39     | 93     | 91     | 91     | 88     | 38     | 39     | 37     | 1507   | 1516   | 1491   | 158    | 159    |
| Zn     | 22      | 21     | 21     | 26     | 27     | 24     | 27     | 22     | 22     | 22     | 375    | 370    | 365    | 50     | 51     |
| Ga     | 2.9     | 3.0    | 2.9    | 2.8    | 3.0    | 2.8    | 3.3    | 2.9    | 3.2    | 2.9    | 3.1    | 2.9    | 2.8    | 3.5    | 3.7    |
| Ge     | <0.80   | 1.35   | 0.83   | 1      | <0.77  | 1.01   | 1.75   | 1.01   | <0.83  | 0.84   | 1.98   | 1.25   | 1.16   | 1.32   | 1.22   |
| As     | 6.6     | 6.1    | 6.1    | 6.0    | 4.8    | 5.1    | 5.2    | 4.7    | 4.3    | 4.2    | 9.3    | 9.6    | 9.1    | 15.8   | 15.2   |
| Rb     | 7.9     | 7.7    | 7.6    | 8.2    | 8.2    | 8.2    | 7.9    | 9.0    | 8.6    | 8.5    | 7.0    | 7.1    | 7.1    | 9.0    | 9.3    |
| Sr     | 621     | 617    | 608    | 722    | 726    | 716    | 730    | 710    | 694    | 679    | 589    | 594    | 589    | 679    | 667    |
| Y      | 7.9     | 8.0    | 7.7    | 7.7    | 7.7    | 7.6    | 7.9    | 8.0    | 7.9    | 7.6    | 7.1    | 7.1    | 7.4    | 10.9   | 10.9   |
| Zr     | 89.7    | 90.5   | 84.1   | 79.0   | 80.0   | 80.5   | 80.3   | 95.3   | 94.6   | 92.0   | 70.1   | 72.6   | 70.9   | 95.5   | 92.2   |
| Nb     | 2.57    | 2.67   | 2.44   | 2.40   | 2.35   | 2.48   | 2.51   | 2.79   | 2.84   | 2.79   | 2.14   | 2.25   | 2.17   | 2.94   | 2.95   |
| Mo     | 1.87    | 1.88   | 2.06   | 3.13   | 3.40   | 3.37   | 3.30   | 1.98   | 1.98   | 1.79   | 2.84   | 3.00   | 2.88   | 3.51   | 3.94   |
| Ag     | <0.046  | 0.04   | 0.04   | 0.10   | 0.10   | 0.11   | 0.11   | 0.07   | 0.04   | 0.08   | 2.83   | 3.03   | 2.84   | 0.29   | 0.29   |
| Cd     | <0.41   | <0.197 | <0.30  | <0.42  | <0.31  | 0.43   | <0.44  | <0.34  | <0.28  | <0.26  | <0.31  | <0.22  | <0.209 | <0.26  | 0.22   |
| In     | <0.030  | 0.02   | 0.03   | 0.11   | 0.10   | 0.08   | 0.09   | 0.04   | 0.03   | 0.03   | 9.50   | 9.61   | 9.36   | 0.16   | 0.18   |
| Sn     | 5       | 5      | 5      | 23     | 26     | 18     | 24     | 7      | 7      | 6      | 2397   | 2417   | 2355   | 30     | 30     |
| Sb     | 67      | 68     | 57     | 165    | 164    | 163    | 139    | 214    | 211    | 203    | 115    | 116    | 115    | 120    | 119    |
| Cs     | 0.091   | 0.117  | 0.125  | 0.115  | 0.076  | 0.116  | 0.113  | 0.108  | 0.134  | 0.107  | 0.117  | 0.110  | 0.092  | 0.177  | 0.193  |
| Ba     | 279     | 275    | 271    | 335    | 339    | 337    | 341    | 255    | 250    | 240    | 270    | 275    | 273    | 260    | 258    |
| La     | 8.050   | 8.560  | 7.980  | 7.750  | 8.200  | 7.840  | 7.850  | 8.390  | 8.360  | 7.900  | 7.200  | 7.170  | 7.460  | 12.330 | 11.930 |
| Ce     | 13.940  | 13.970 | 13.130 | 13.160 | 13.640 | 12.980 | 13.460 | 14.450 | 14.150 | 14.000 | 12.090 | 12.120 | 12.320 | 15.550 | 15.310 |
| Pr     | 1.780   | 1.900  | 1.800  | 1.729  | 1.735  | 1.822  | 1.689  | 1.830  | 1.810  | 1.670  | 1.590  | 1.700  | 1.570  | 2.680  | 2.680  |
| Nd     | 7.580   | 8.110  | 7.850  | 7.350  | 7.340  | 7.560  | 7.600  | 7.830  | 7.750  | 7.310  | 6.420  | 6.670  | 6.890  | 10.930 | 11.010 |
| Sm     | 1.620   | 1.740  | 1.200  | 1.640  | 1.490  | 1.540  | 1.570  | 1.790  | 1.590  | 1.590  | 1.460  | 1.580  | 1.390  | 2.430  | 2.140  |
| Eu     | 0.325   | 0.338  | 0.386  | 0.375  | 0.491  | 0.361  | 0.397  | 0.430  | 0.494  | 0.442  | 0.334  | 0.327  | 0.414  | 0.625  | 0.532  |
| Gd     | 1.330   | 1.380  | 1.190  | 1.530  | 1.370  | 1.330  | 1.470  | 1.550  | 1.480  | 1.290  | 1.360  | 1.380  | 1.220  | 2.200  | 2.160  |
| Tb     | 0.246   | 0.236  | 0.228  | 0.216  | 0.268  | 0.239  | 0.200  | 0.209  | 0.246  | 0.208  | 0.220  | 0.207  | 0.162  | 0.349  | 0.326  |
| Dy     | 1.430   | 1.270  | 1.240  | 1.280  | 1.280  | 1.230  | 1.280  | 1.480  | 1.300  | 1.370  | 1.130  | 1.110  | 1.110  | 2.150  | 1.880  |
| Ho     | 0.268   | 0.298  | 0.265  | 0.283  | 0.255  | 0.317  | 0.276  | 0.233  | 0.298  | 0.258  | 0.282  | 0.256  | 0.235  | 0.416  | 0.405  |
| Er     | 0.760   | 0.720  | 0.780  | 0.671  | 0.775  | 0.781  | 0.747  | 0.750  | 0.645  | 0.694  | 0.721  | 0.696  | 0.738  | 1.140  | 1.280  |
| Tm     | 0.103   | 0.104  | 0.099  | 0.107  | 0.085  | 0.108  | 0.090  | 0.109  | 0.095  | 0.080  | 0.114  | 0.100  | 0.098  | 0.179  | 0.162  |
| Yb     | 0.750   | 0.820  | 0.710  | 0.658  | 0.810  | 0.850  | 0.638  | 0.860  | 0.760  | 0.770  | 0.740  | 0.660  | 0.710  | 1.070  | 0.870  |
| Lu     | 0.134   | 0.123  | 0.121  | 0.116  | 0.101  | 0.120  | 0.101  | 0.117  | 0.116  | 0.107  | 0.110  | 0.095  | 0.098  | 0.155  | 0.149  |
| Hf     | 2.310   | 2.160  | 1.850  | 1.870  | 2.030  | 1.660  | 1.840  | 2.230  | 2.080  | 2.000  | 1.810  | 1.650  | 1.590  | 2.360  | 2.120  |
| Ta     | 0.127   | 0.159  | 0.149  | 0.143  | 0.143  | 0.112  | 0.157  | 0.173  | 0.169  | 0.153  | 0.134  | 0.147  | 0.130  | 0.198  | 0.162  |
| W      | 0.125   | 0.139  | 0.289  | 0.147  | 0.284  | 0.229  | 0.221  | 0.182  | 0.136  | 0.121  | 0.336  | 0.336  | 0.368  | 0.339  | 0.274  |
| Au     | <0.0282 | <0.00  | <0.00  | <0.00  | 0.008  | 0.006  | 0.006  | <0.00  | <0.00  | 0.007  | 0.249  | 0.199  | 0.167  | 0.055  | 0.056  |
| Tl     |         |        |        | 0.069  | 0.087  | 0.066  | 0.113  |        |        |        |        |        |        |        |        |
| Pb     | 55      | 54     | 51     | 135    | 134    | 129    | 131    | 66     | 66     | 63     | 6638   | 6685   | 6610   | 387    | 387    |
| Th     | 1.410   | 1.370  | 1.320  | 1.341  | 1.317  | 1.237  | 1.155  | 1.590  | 1.380  | 1.440  | 1.070  | 1.200  | 1.230  | 1.770  | 1.620  |
| U      | 1.340   | 1.320  | 1.350  | 1.160  | 1.070  | 1.010  | 1.110  | 1.280  | 1.270  | 1.130  | 1.000  | 1.130  | 1.180  | 1.380  | 1.220  |

(continued)

| Sample | SPC 6  | SPC 6  | SPC 6  | SPC 7   | SPC 7  | SPC 7  | SPC 8  | SPC 8  | SPC 8  | SPC 9  |
|--------|--------|--------|--------|---------|--------|--------|--------|--------|--------|--------|--------|--------|--------|--------|
| Li     | 6.62   | 8.16   | 7.78   | 5.22    | 5.2    | 4.8    | 8.35   | 8.01   | 7.98   | 4.76   | 5.64   | 5.15   | 5.29   | 7.15   |
| Be     | 0.33   | 0.52   | 0.57   | 0.281   | 0.214  | 0.49   | 0.62   | 0.57   | 0.38   | 0.16   | 0.28   | 0.37   | 0.32   | 0.24   |
| B      | 191.6  | 189.9  | 187.5  | 148.6   | 136.6  | 124.9  | 163.3  | 156.8  | 161.2  | 150.0  | 157.3  | 160.8  | 160.8  | 159.0  |
| Sc     | 3.3    | 2.9    | 3.1    | 4.1     | 3.2    | 2.8    | 2.8    | 2.8    | 2.8    | 2.3    | 2.2    | 2.3    | 2.3    | 2.4    |
| Ti     | 892    | 864    | 880    | 488     | 452    | 469    | 957    | 950    | 977    | 766    | 753    | 771    | 764    | 791    |
| V      | 31     | 31     | 30     | 10      | 9      | 9      | 41     | 41     | 42     | 22     | 21     | 21     | 21     | 22     |
| Cr     | 17     | 16     | 16     | 44      | 12     | 12     | 19     | 16     | 17     | 18     | 19     | 18     | 18     | 19     |
| Co     | 7      | 7      | 9      | 2       | 2      | 2      | 23     | 23     | 23     | 29     | 28     | 29     | 30     | 10     |
| Ni     | 12     | 13     | 14     | 5       | 4      | 4      | 24     | 25     | 24     | 13     | 13     | 13     | 12     | 15     |
| Cu     | 99     | 92     | 98     | 24      | 25     | 26     | 199    | 197    | 193    | 1143   | 1147   | 1128   | 1052   | 172    |
| Zn     | 24     | 25     | 26     | 11      | 11     | 11     | 51     | 49     | 49     | 49     | 48     | 53     | 62     | 31     |
| Ga     | 3.2    | 3.0    | 3.2    | 3.0     | 2.9    | 2.9    | 3.6    | 3.6    | 3.5    | 2.8    | 2.8    | 2.8    | 2.7    | 2.9    |
| Ge     | 1.08   | 2.24   | 1.32   | <0.62   | <0.75  | <0.76  | 1.27   | 0.8    | 1.72   | 0.98   | 1.08   | 1.08   | 1.1    | <0.73  |
| As     | 6.6    | 5.8    | 6.2    | 2.2     | 2.2    | 1.9    | 8.8    | 8.2    | 7.0    | 17.1   | 18.1   | 19.6   | 16.7   | 4.7    |
| Rb     | 7.6    | 7.4    | 7.7    | 8.5     | 8.9    | 8.9    | 9.5    | 9.1    | 9.1    | 8.5    | 8.6    | 8.7    | 8.9    | 9.4    |
| Sr     | 789    | 765    | 777    | 511     | 510    | 512    | 744    | 740    | 770    | 461    | 463    | 474    | 463    | 564    |
| Y      | 8.3    | 8.3    | 8.6    | 7.0     | 7.1    | 7.0    | 8.8    | 8.9    | 9.0    | 6.9    | 6.7    | 7.1    | 6.7    | 7.2    |
| Zr     | 88.1   | 86.5   | 88.6   | 45.3    | 43.5   | 44.6   | 89.5   | 92.5   | 93.6   | 71.3   | 69.7   | 69.7   | 69.1   | 71.4   |
| Nb     | 2.64   | 2.59   | 2.72   | 1.54    | 1.50   | 1.57   | 2.80   | 2.77   | 2.77   | 2.05   | 1.94   | 2.05   | 2.02   | 2.16   |
| Mo     | 3.79   | 3.63   | 3.77   | 0.23    | 0.23   | 0.30   | 5.06   | 5.14   | 5.24   | 2.26   | 2.09   | 2.15   | 2.14   | 1.67   |
| Ag     | 0.09   | 0.09   | 0.12   | 0.04    | 0.04   | 0.04   | 0.32   | 0.32   | 0.34   | 1.61   | 1.58   | 1.48   | 1.38   | 0.51   |
| Cd     | <0.25  | <0.22  | 0.20   | <0.36   | <0.33  | <0.24  | <0.191 | <0.152 | <0.30  | <0.24  | <0.170 | <0.26  | <0.20  | <0.196 |
| In     | 0.07   | 0.05   | 0.10   | 0.02    | 0.02   | 0.02   | 0.37   | 0.41   | 0.32   | 0.95   | 0.87   | 1.00   | 0.89   | 0.48   |
| Sn     | 12     | 13     | 19     | 3       | 3      | 3      | 89     | 88     | 77     | 232    | 221    | 235    | 229    | 122    |
| Sb     | 159    | 134    | 141    | 9       | 7      | 8      | 156    | 153    | 149    | 1719   | 1755   | 1756   | 1763   | 194    |
| Cs     | 0.119  | 0.107  | 0.119  | 0.104   | 0.103  | 0.093  | 0.148  | 0.160  | 0.121  | 0.108  | 0.147  | 0.141  | 0.144  | 0.133  |
| Ba     | 388    | 377    | 385    | 232     | 232    | 237    | 309    | 314    | 315    | 282    | 279    | 286    | 285    | 259    |
| La     | 8.820  | 8.430  | 8.600  | 6.590   | 6.600  | 6.730  | 9.530  | 9.200  | 9.670  | 7.030  | 6.760  | 6.960  | 6.900  | 7.460  |
| Ce     | 14.150 | 13.850 | 14.750 | 12.120  | 12.150 | 12.030 | 14.050 | 14.120 | 14.840 | 12.070 | 11.820 | 11.930 | 12.380 | 13.010 |
| Pr     | 1.900  | 1.780  | 1.850  | 1.459   | 1.455  | 1.510  | 2.040  | 2.100  | 1.980  | 1.506  | 1.511  | 1.556  | 1.481  | 1.730  |
| Nd     | 7.430  | 6.970  | 7.590  | 6.170   | 6.190  | 6.290  | 7.960  | 8.540  | 8.900  | 6.720  | 6.300  | 6.780  | 6.570  | 6.780  |
| Sm     | 1.560  | 1.390  | 1.650  | 1.300   | 1.200  | 1.260  | 1.990  | 1.760  | 1.770  | 1.330  | 1.340  | 1.430  | 1.120  | 1.410  |
| Eu     | 0.411  | 0.379  | 0.417  | 0.420   | 0.347  | 0.397  | 0.510  | 0.393  | 0.475  | 0.374  | 0.347  | 0.383  | 0.335  | 0.394  |
| Gd     | 1.340  | 1.350  | 1.470  | 1.290   | 1.190  | 0.960  | 1.650  | 1.460  | 1.550  | 1.110  | 1.150  | 1.190  | 1.130  | 1.370  |
| Tb     | 0.214  | 0.210  | 0.256  | 0.175   | 0.200  | 0.169  | 0.238  | 0.243  | 0.265  | 0.186  | 0.179  | 0.195  | 0.179  | 0.203  |
| Dy     | 1.310  | 1.470  | 1.360  | 1.070   | 1.100  | 1.320  | 1.650  | 1.560  | 1.730  | 1.084  | 1.015  | 1.197  | 1.290  | 1.270  |
| Ho     | 0.312  | 0.285  | 0.306  | 0.230   | 0.232  | 0.236  | 0.342  | 0.331  | 0.318  | 0.260  | 0.264  | 0.256  | 0.244  | 0.284  |
| Er     | 0.950  | 0.712  | 0.669  | 0.658   | 0.602  | 0.625  | 0.840  | 0.760  | 0.880  | 0.598  | 0.543  | 0.584  | 0.624  | 0.732  |
| Tm     | 0.104  | 0.110  | 0.118  | 0.084   | 0.094  | 0.091  | 0.139  | 0.109  | 0.160  | 0.108  | 0.091  | 0.080  | 0.104  | 0.093  |
| Yb     | 0.709  | 0.810  | 0.830  | 0.530   | 0.679  | 0.548  | 0.910  | 0.900  | 0.840  | 0.733  | 0.681  | 0.622  | 0.584  | 0.634  |
| Lu     | 0.112  | 0.119  | 0.126  | 0.080   | 0.075  | 0.072  | 0.124  | 0.149  | 0.121  | 0.089  | 0.072  | 0.090  | 0.104  | 0.091  |
| Hf     | 2.160  | 2.050  | 2.140  | 1.300   | 1.250  | 1.080  | 2.480  | 2.150  | 2.090  | 1.700  | 1.560  | 1.420  | 1.790  | 1.810  |
| Ta     | 0.163  | 0.159  | 0.162  | 0.081   | 0.094  | 0.079  | 0.162  | 0.130  | 0.213  | 0.135  | 0.145  | 0.119  | 0.140  | 0.138  |
| W      | 0.314  | 0.234  | 0.301  | 0.077   | 0.054  | 0.073  | 0.269  | 0.315  | 0.313  | 1.680  | 1.790  | 1.070  | 0.910  | 0.270  |
| Au     | 0.005  | <0.00  | 0.013  | <0.0191 | 0.013  | 0.005  | 0.040  | 0.077  | 0.034  | 1.020  | 0.989  | 1.029  | 0.679  | 0.196  |
| Tl     |        |        |        |         |        |        |        |        |        | 0.011  | 0.020  | 0.010  | 0.015  | 0.018  |
| Pb     | 126    | 117    | 141    | 32      | 32     | 29     | 651    | 666    | 529    | 2280   | 2283   | 2172   | 2196   | 480    |
| Th     | 1.470  | 1.340  | 1.520  | 0.877   | 0.851  | 0.866  | 1.530  | 1.270  | 1.660  | 1.104  | 1.002  | 1.118  | 1.130  | 1.130  |
| U      | 1.294  | 1.349  | 1.254  | 0.880   | 0.830  | 0.796  | 1.100  | 1.240  | 1.100  | 1.010  | 0.970  | 0.920  | 1.040  | 1.070  |

(continued)

| Sample | SPC 9  | SPC 10 | SPC 10 | SPC 10  | SPC 11 | SPC 11 | SPC 11 | SPC 12  | SPC 12  | SPC 12 | SPC 13 | SPC 13 | SPC 14 | SPC 14 |
|--------|--------|--------|--------|---------|--------|--------|--------|---------|---------|--------|--------|--------|--------|--------|
| Li     | 7.04   | 3.81   | 3.53   | 3.58    | 5.57   | 5.22   | 5.3    | 3.89    | 3.68    | 3.32   | 4.3    | 4.15   | 3.26   | 3.32   |
| Be     | 0.061  | 0.41   | 0.147  | 0.32    | 0.49   | 0.318  | 0.42   | 0.259   | 0.33    | 0.182  | 0.172  | 0.29   | 0.54   | 0.217  |
| B      | 159.9  | 92.3   | 94.9   | 95.9    | 110.0  | 104.1  | 100.5  | 138.5   | 137.3   | 128.1  | 143.8  | 141.1  | 96.6   | 95.6   |
| Sc     | 2.5    | 1.5    | 1.5    | 1.5     | 2.6    | 2.5    | 2.3    | 3.3     | 3.3     | 3.0    | 2.5    | 2.4    | 1.7    | 1.5    |
| Ti     | 771    | 440    | 454    | 456     | 640    | 640    | 649    | 466     | 446     | 456    | 824    | 807    | 461    | 476    |
| V      | 21     | 8      | 8      | 8       | 14     | 15     | 15     | 9       | 8       | 8      | 15     | 15     | 8      | 8      |
| Cr     | 19     | 17     | 17     | 17      | 16     | 17     | 17     | 20      | 18      | 17     | 15     | 15     | 15     | 16     |
| Co     | 10     | 1      | 1      | 1       | 13     | 12     | 13     | 1       | 1       | 1      | 3      | 3      | 1      | 1      |
| Ni     | 14     | 3      | 3      | 4       | 8      | 7      | 8      | 4       | 3       | 3      | 5      | 5      | 3      | 4      |
| Cu     | 180    | 10     | 11     | 11      | 779    | 776    | 766    | 9       | 10      | 10     | 21     | 20     | 10     | 10     |
| Zn     | 33     | 5      | 5      | 5       | 88     | 93     | 91     | 5       | 6       | 5      | 15     | 15     | 6      | 5      |
| Ga     | 3.0    | 2.9    | 3.1    | 2.8     | 3.1    | 3.4    | 3.3    | 3.0     | 2.8     | 2.9    | 1.8    | 1.8    | 2.9    | 3.2    |
| Ge     | 1.51   | <0.72  | 0.83   | <0.72   | 1.08   | <0.76  | 1.08   | <0.64   | 0.77    | 0.63   | <0.72  | <0.63  | <0.72  | 1.06   |
| As     | 4.1    | 1.6    | 1.9    | 1.4     | 10.1   | 10.1   | 9.5    | 1.6     | 1.5     | 1.5    | 1.7    | 1.6    | 1.3    | 1.6    |
| Rb     | 9.3    | 8.2    | 8.4    | 8.3     | 9.4    | 9.5    | 9.4    | 8.5     | 8.5     | 8.3    | 5.7    | 5.3    | 8.2    | 8.5    |
| Sr     | 561    | 360    | 368    | 367     | 484    | 494    | 490    | 383     | 373     | 369    | 644    | 618    | 384    | 397    |
| Y      | 7.3    | 5.9    | 6.0    | 6.1     | 7.2    | 7.3    | 7.2    | 6.3     | 6.1     | 6.2    | 4.7    | 4.6    | 6.1    | 6.4    |
| Zr     | 73.1   | 46.8   | 47.7   | 47.7    | 58.3   | 58.9   | 58.1   | 49.6    | 49.5    | 47.3   | 67.8   | 68.5   | 48.9   | 50.3   |
| Nb     | 2.22   | 1.41   | 1.37   | 1.44    | 1.93   | 2.11   | 2.04   | 1.51    | 1.40    | 1.41   | 2.09   | 1.95   | 1.42   | 1.49   |
| Mo     | 2.23   | 0.35   | 0.38   | 0.35    | 0.88   | 0.68   | 0.82   | 0.33    | 0.40    | 0.32   | 0.79   | 0.77   | 0.28   | 0.28   |
| Ag     | 0.50   | 0.01   | 0.00   | 0.02    | 0.73   | 0.70   | 0.72   | 0.02    | <0.0144 | 0.03   | 0.03   | 0.06   | 0.01   | 0.02   |
| Cd     | <0.32  | <0.25  | <0.23  | <0.26   | <0.30  | <0.27  | <0.34  | <0.22   | <0.25   | <0.28  | <0.28  | <0.37  | <0.37  | <0.258 |
| In     | 0.65   | 0.01   | 0.00   | <0.0064 | 0.74   | 0.73   | 0.74   | 0.01    | <0.0043 | 0.01   | 0.02   | 0.01   | 0.01   | 0.01   |
| Sn     | 150    | 1      | 1      | 1       | 191    | 196    | 193    | 1       | 1       | 1      | 3      | 4      | 1      | 1      |
| Sb     | 222    | <0.097 | <0.103 | <0.096  | 558    | 569    | 557    | <0.261  | <0.106  | <0.108 | 68     | 66     | <0.077 | 0      |
| Cs     | 0.168  | 0.099  | 0.097  | 0.090   | 0.142  | 0.149  | 0.154  | 0.091   | 0.085   | 0.087  | 0.061  | 0.075  | 0.081  | 0.080  |
| Ba     | 256    | 202    | 204    | 203     | 233    | 235    | 232    | 212     | 206     | 203    | 186    | 180    | 212    | 214    |
| La     | 7.390  | 5.820  | 5.690  | 5.840   | 7.300  | 7.350  | 7.150  | 6.220   | 6.090   | 5.990  | 4.690  | 4.440  | 5.870  | 6.390  |
| Ce     | 12.710 | 10.640 | 10.550 | 10.450  | 12.850 | 12.860 | 12.770 | 11.210  | 10.640  | 10.640 | 8.890  | 8.500  | 11.090 | 11.280 |
| Pr     | 1.640  | 1.290  | 1.310  | 1.310   | 1.610  | 1.650  | 1.464  | 1.407   | 1.316   | 1.280  | 1.031  | 1.046  | 1.330  | 1.350  |
| Nd     | 6.620  | 5.270  | 5.460  | 5.710   | 6.780  | 6.970  | 6.950  | 5.790   | 5.690   | 5.560  | 5.080  | 4.040  | 5.790  | 6.020  |
| Sm     | 1.420  | 1.010  | 1.160  | 1.190   | 1.210  | 1.280  | 1.300  | 1.160   | 1.270   | 1.180  | 0.719  | 0.723  | 1.340  | 1.350  |
| Eu     | 0.337  | 0.335  | 0.340  | 0.411   | 0.405  | 0.428  | 0.425  | 0.379   | 0.325   | 0.372  | 0.264  | 0.162  | 0.325  | 0.300  |
| Gd     | 1.480  | 1.060  | 1.120  | 1.230   | 1.230  | 1.190  | 1.390  | 1.080   | 1.000   | 1.025  | 0.719  | 0.762  | 0.990  | 1.060  |
| Tb     | 0.205  | 0.153  | 0.171  | 0.168   | 0.225  | 0.191  | 0.196  | 0.189   | 0.182   | 0.193  | 0.133  | 0.139  | 0.167  | 0.203  |
| Dy     | 1.410  | 0.960  | 1.040  | 0.870   | 1.160  | 1.060  | 1.210  | 1.017   | 0.960   | 0.926  | 0.745  | 0.839  | 0.960  | 1.020  |
| Ho     | 0.244  | 0.184  | 0.263  | 0.191   | 0.256  | 0.253  | 0.260  | 0.194   | 0.227   | 0.201  | 0.163  | 0.171  | 0.219  | 0.200  |
| Er     | 0.703  | 0.545  | 0.627  | 0.495   | 0.676  | 0.698  | 0.621  | 0.668   | 0.596   | 0.496  | 0.410  | 0.494  | 0.617  | 0.640  |
| Tm     | 0.104  | 0.083  | 0.082  | 0.068   | 0.104  | 0.094  | 0.092  | 0.076   | 0.064   | 0.076  | 0.068  | 0.069  | 0.095  | 0.082  |
| Yb     | 0.710  | 0.507  | 0.443  | 0.590   | 0.698  | 0.596  | 0.537  | 0.650   | 0.513   | 0.542  | 0.390  | 0.526  | 0.499  | 0.586  |
| Lu     | 0.122  | 0.061  | 0.076  | 0.082   | 0.110  | 0.090  | 0.080  | 0.075   | 0.073   | 0.074  | 0.072  | 0.079  | 0.074  | 0.095  |
| Hf     | 1.690  | 0.940  | 0.980  | 1.310   | 1.570  | 1.390  | 1.550  | 1.210   | 1.160   | 1.150  | 1.650  | 1.590  | 1.030  | 1.230  |
| Ta     | 0.150  | 0.096  | 0.074  | 0.064   | 0.098  | 0.126  | 0.121  | 0.076   | 0.091   | 0.094  | 0.120  | 0.098  | 0.075  | 0.077  |
| W      | 0.267  | 0.109  | 0.083  | 0.110   | 0.191  | 0.256  | 0.205  | 0.063   | 0.065   | 0.074  | 0.044  | 0.039  | 0.083  | 0.055  |
| Au     | 0.185  | <0.00  | <0.00  | <0.00   | 0.222  | 0.274  | 0.243  | <0.00   | <0.00   | <0.00  | 0.006  | <0.00  | <0.00  | 0.006  |
| Tl     | 0.017  |        |        |         |        |        |        | <0.0121 | 0.006   | 0.003  | 0.010  | 0.007  |        |        |
| Pb     | 515    | 4      | 5      | 4       | 2700   | 2684   | 2630   | 4       | 4       | 4      | 13     | 14     | 4      | 4      |
| Th     | 1.150  | 0.779  | 0.661  | 0.676   | 1.057  | 1.110  | 1.018  | 0.829   | 0.851   | 0.764  | 0.830  | 0.911  | 1.000  | 0.808  |
| U      | 0.980  | 0.729  | 0.792  | 0.804   | 1.068  | 1.192  | 1.046  | 0.770   | 0.783   | 0.726  | 1.200  | 1.230  | 0.771  | 0.794  |

(continued)

| Sample | SPC 14  | SPC 16  | SPC 16  | SPC 16  | SPC 16 | SPC 16  | SPC 17 | SPC 18 | SPC 18 | SPC 18 |
|--------|---------|---------|---------|---------|--------|---------|--------|--------|--------|--------|--------|--------|--------|--------|
| Li     | 3.25    | 5.19    | 5.74    | 5.47    | 4.74   | 5.7     | 4.23   | 4.29   | 4.59   | 3.88   | 3.77   | 5.57   | 4.89   | 4.77   |
| Be     | 0.52    | 0.37    | 0.47    | 0.23    | 0.25   | 0.106   | 0.24   | 0.42   | 0.24   | 0.44   | 0.27   | 0.29   | 0.206  | 0.61   |
| B      | 101.7   | 78.1    | 81.3    | 81.9    | 78.2   | 104.7   | 115.0  | 115.5  | 113.0  | 122.2  | 126.0  | 112.8  | 112.9  | 117.8  |
| Sc     | 1.6     | 1.9     | 1.9     | 2.0     | 1.9    | 1.9     | 2.0    | 2.1    | 1.9    | 2.1    | 2.0    | 2.3    | 2.3    | 2.3    |
| Ti     | 465     | 501     | 507     | 496     | 472    | 487     | 543    | 546    | 519    | 533    | 503    | 622    | 639    | 634    |
| V      | 8       | 10      | 10      | 10      | 10     | 10      | 13     | 12     | 12     | 13     | 12     | 15     | 16     | 16     |
| Cr     | 14      | 12      | 12      | 14      | 12     | 13      | 19     | 18     | 18     | 19     | 18     | 14     | 21     | 15     |
| Co     | 1       | 2       | 1       | 2       | 1      | 2       | 8      | 9      | 8      | 9      | 8      | 33     | 43     | 35     |
| Ni     | 3       | 6       | 4       | 5       | 4      | 5       | 10     | 9      | 9      | 11     | 10     | 38     | 50     | 40     |
| Cu     | 11      | 22      | 15      | 17      | 19     | 22      | 312    | 310    | 319    | 330    | 292    | 2032   | 2062   | 2064   |
| Zn     | 6       | 6       | 5       | 6       | 9      | 11      | 33     | 33     | 33     | 35     | 33     | 603    | 741    | 589    |
| Ga     | 2.8     | 3.2     | 3.2     | 3.0     | 3.0    | 3.2     | 3.0    | 2.9    | 2.9    | 3.0    | 2.7    | 3.0    | 2.9    | 3.1    |
| Ge     | 0.8     | <0.85   | 2.38    | 1.06    | <0.71  | <0.80   | 1.22   | 1.01   | 0.81   | <0.73  | 0.9    | 1.08   | 0.85   | 0.89   |
| As     | 1.6     | 1.5     | 1.4     | 1.5     | 1.5    | 1.4     | 4.8    | 4.7    | 4.7    | 4.4    | 3.9    | 33.3   | 35.8   | 30.5   |
| Rb     | 8.3     | 8.8     | 9.0     | 9.2     | 9.2    | 9.8     | 8.2    | 8.3    | 8.5    | 8.3    | 8.0    | 7.2    | 7.2    | 7.3    |
| Sr     | 391     | 360     | 369     | 366     | 352    | 369     | 479    | 481    | 471    | 480    | 456    | 539    | 545    | 535    |
| Y      | 6.2     | 6.9     | 6.9     | 7.0     | 6.7    | 6.8     | 6.9    | 6.5    | 6.5    | 6.7    | 6.3    | 7.0    | 7.1    | 7.1    |
| Zr     | 49.6    | 45.9    | 47.6    | 46.8    | 44.6   | 46.8    | 53.4   | 52.8   | 51.2   | 52.5   | 50.6   | 58.9   | 59.4   | 58.3   |
| Nb     | 1.45    | 1.67    | 1.65    | 1.74    | 1.61   | 1.61    | 1.60   | 1.75   | 1.59   | 1.72   | 1.71   | 1.97   | 2.01   | 2.03   |
| Mo     | 0.38    | 0.49    | 0.47    | 0.44    | 0.70   | 0.65    | 0.79   | 0.77   | 0.79   | 0.88   | 0.70   | 1.09   | 1.33   | 1.22   |
| Ag     | 0.02    | 0.02    | 0.05    | 0.03    | 0.02   | <0.0205 | 0.39   | 0.41   | 0.52   | 0.52   | 0.40   | 9.87   | 9.79   | 10.12  |
| Cd     | <0.30   | <0.33   | <0.23   | <0.39   | <0.30  | <0.39   | <0.38  | <0.32  | <0.199 | <0.33  | 0.17   | 0.25   | <0.33  | 0.26   |
| In     | <0.0063 | <0.0120 | <0.0084 | <0.0089 | 0.02   | 0.04    | 0.67   | 0.68   | 0.63   | 0.70   | 0.68   | 9.39   | 11.38  | 10.03  |
| Sn     | 1       | 1       | 1       | 2       | 2      | 7       | 174    | 158    | 163    | 172    | 163    | 2423   | 2885   | 2557   |
| Sb     | 0       | 2       | 0       | 3       | 2      | 2       | 181    | 180    | 178    | 190    | 169    | 407    | 389    | 406    |
| Cs     | 0.080   | 0.088   | 0.103   | 0.101   | 0.110  | 0.130   | 0.093  | 0.088  | 0.110  | 0.095  | 0.075  | 0.079  | 0.106  | 0.105  |
| Ba     | 209     | 219     | 223     | 224     | 213    | 222     | 231    | 228    | 223    | 222    | 216    | 248    | 250    | 247    |
| La     | 6.100   | 6.600   | 6.890   | 6.750   | 6.420  | 6.980   | 6.700  | 6.630  | 6.510  | 6.660  | 6.230  | 7.310  | 7.220  | 7.080  |
| Ce     | 10.940  | 12.490  | 12.550  | 12.280  | 12.050 | 12.800  | 12.270 | 12.140 | 11.460 | 11.880 | 11.330 | 12.340 | 12.370 | 12.160 |
| Pr     | 1.350   | 1.438   | 1.562   | 1.487   | 1.501  | 1.483   | 1.498  | 1.492  | 1.412  | 1.440  | 1.492  | 1.574  | 1.486  | 1.587  |
| Nd     | 5.710   | 6.230   | 6.270   | 7.020   | 6.380  | 6.700   | 6.550  | 6.140  | 6.130  | 6.710  | 6.540  | 6.780  | 7.050  | 6.330  |
| Sm     | 1.180   | 1.260   | 1.480   | 1.490   | 1.310  | 1.550   | 1.310  | 1.330  | 1.020  | 1.430  | 1.280  | 1.460  | 1.250  | 1.290  |
| Eu     | 0.301   | 0.396   | 0.380   | 0.389   | 0.353  | 0.441   | 0.388  | 0.367  | 0.321  | 0.356  | 0.337  | 0.404  | 0.346  | 0.323  |
| Gd     | 1.200   | 1.020   | 1.170   | 1.270   | 1.120  | 1.070   | 1.240  | 1.160  | 1.030  | 1.010  | 1.090  | 1.250  | 1.130  | 1.150  |
| Tb     | 0.160   | 0.162   | 0.197   | 0.216   | 0.170  | 0.164   | 0.169  | 0.177  | 0.194  | 0.182  | 0.169  | 0.211  | 0.199  | 0.209  |
| Dy     | 1.060   | 1.100   | 1.110   | 1.270   | 1.160  | 1.180   | 1.220  | 1.200  | 1.005  | 1.024  | 1.043  | 1.163  | 1.206  | 1.237  |
| Ho     | 0.213   | 0.234   | 0.245   | 0.219   | 0.219  | 0.217   | 0.235  | 0.203  | 0.213  | 0.219  | 0.203  | 0.267  | 0.273  | 0.272  |
| Er     | 0.529   | 0.646   | 0.618   | 0.709   | 0.719  | 0.609   | 0.628  | 0.648  | 0.506  | 0.682  | 0.675  | 0.698  | 0.683  | 0.679  |
| Tm     | 0.094   | 0.066   | 0.092   | 0.077   | 0.085  | 0.088   | 0.081  | 0.058  | 0.097  | 0.067  | 0.096  | 0.093  | 0.122  | 0.096  |
| Yb     | 0.583   | 0.578   | 0.483   | 0.659   | 0.700  | 0.489   | 0.622  | 0.594  | 0.682  | 0.830  | 0.608  | 0.777  | 0.771  | 0.697  |
| Lu     | 0.090   | 0.093   | 0.104   | 0.102   | 0.071  | 0.070   | 0.094  | 0.073  | 0.092  | 0.073  | 0.100  | 0.103  | 0.091  | 0.108  |
| Hf     | 1.470   | 1.070   | 1.290   | 1.000   | 1.070  | 0.960   | 1.190  | 1.310  | 1.450  | 1.410  | 1.340  | 1.460  | 1.500  | 1.490  |
| Ta     | 0.083   | 0.099   | 0.090   | 0.104   | 0.088  | 0.106   | 0.102  | 0.099  | 0.113  | 0.080  | 0.129  | 0.114  | 0.129  | 0.115  |
| W      | 0.051   | 0.078   | 0.147   | 0.148   | 0.097  | 0.143   | 0.127  | 0.127  | 0.155  | 0.190  | 0.092  | 0.262  | 0.269  | 0.230  |
| Au     | <0.00   | 0.007   | <0.00   | <0.00   | <0.00  | <0.00   | 0.159  | 0.163  | 0.167  | 0.183  | 0.121  | 0.657  | 0.772  | 0.708  |
| Tl     |         | 0.004   | 0.004   | <0.023  | 0.027  | <0.00   | 0.008  | 0.011  | 0.018  | 0.014  | 0.016  | 0.027  | 0.023  | 0.016  |
| Pb     | 4       | 9       | 5       | 8       | 8      | 8       | 1381   | 1290   | 1299   | 1384   | 1297   | 17213  | 20308  | 17275  |
| Th     | 0.789   | 0.934   | 0.857   | 0.946   | 0.852  | 0.852   | 0.938  | 0.896  | 0.971  | 0.943  | 0.952  | 0.975  | 0.996  | 0.994  |
| U      | 0.735   | 1.210   | 1.340   | 1.190   | 1.200  | 1.630   | 1.040  | 1.060  | 1.180  | 1.100  | 1.150  | 1.030  | 0.820  | 0.870  |

(continued)

| Sample | SPC 19  | SPC 19 | SPC 19  | SPC 20 | SPC 20 | SPC 20 | SPC 21 | SPC 22 | SPC 22 |
|--------|---------|--------|---------|--------|--------|--------|--------|--------|--------|--------|--------|--------|--------|--------|
|        |         |        |         |        |        |        |        |        |        |        |        |        | Blue   | Blue   |
| Li     | 4.01    | 3.76   | 3.88    | 3.25   | 3.16   | 3.6    | 5.81   | 6.03   | 6.04   | 5.65   | 5.78   | 6.25   | 5.08   | 4.3    |
| Be     | 0.246   | 0.34   | 0.39    | 0.37   | 0.063  | 0.177  | 0.58   | 0.53   | 0.37   | 0.256  | 0.51   | 0.47   | 0.31   | 0.36   |
| B      | 54.0    | 52.6   | 57.2    | 66.0   | 61.8   | 64.5   | 157.6  | 161.3  | 146.5  | 152.4  | 152.1  | 143.8  | 194.9  | 188.8  |
| Sc     | 1.8     | 1.8    | 1.8     | 2.0    | 1.9    | 1.9    | 4.3    | 4.3    | 4.5    | 4.4    | 4.5    | 3.9    | 4.4    | 4.4    |
| Ti     | 454     | 436    | 428     | 462    | 430    | 428    | 1023   | 1020   | 1067   | 1069   | 1061   | 1022   | 1912   | 1834   |
| V      | 8       | 8      | 7       | 8      | 8      | 8      | 31     | 32     | 33     | 33     | 33     | 32     | 38     | 38     |
| Cr     | 18      | 18     | 18      | 11     | 12     | 11     | 57     | 61     | 78     | 83     | 77     | 73     | 40     | 40     |
| Co     | 1       | 1      | 1       | 1      | 1      | 1      | 68     | 66     | 68     | 68     | 68     | 65     | 1104   | 1114   |
| Ni     | 4       | 4      | 3       | 4      | 4      | 3      | 70     | 69     | 72     | 76     | 74     | 65     | 175    | 180    |
| Cu     | 11      | 12     | 11      | 9      | 9      | 9      | 2976   | 3052   | 2987   | 3081   | 3090   | 2969   | 6256   | 6162   |
| Zn     | 5       | 5      | 5       | 7      | 6      | 6      | 5058   | 5696   | 5472   | 5851   | 6022   | 4520   | 348    | 347    |
| Ga     | 2.9     | 2.7    | 2.7     | 3.2    | 3.1    | 3.0    | 3.9    | 3.9    | 4.0    | 3.9    | 3.9    | 3.9    | 7.9    | 7.5    |
| Ge     | 0.79    | 0.99   | <0.60   | 0.81   | 0.9    | 0.8    | 1.72   | 1.68   | 1.52   | 1.52   | 1.67   | 1.67   | 6.65   | 6.96   |
| As     | 1.5     | 1.8    | 1.4     | 1.7    | 1.2    | 1.4    | 33.0   | 33.4   | 34.1   | 35.1   | 37.1   | 33.4   | 99.1   | 104.2  |
| Rb     | 12.1    | 11.8   | 11.6    | 6.4    | 6.3    | 6.0    | 12.3   | 12.0   | 12.1   | 12.4   | 12.3   | 12.4   | 5.0    | 4.9    |
| Sr     | 516     | 503    | 488     | 526    | 501    | 507    | 460    | 448    | 478    | 459    | 464    | 468    | 438    | 428    |
| Y      | 7.2     | 7.0    | 6.8     | 7.7    | 7.6    | 7.5    | 8.4    | 8.4    | 8.8    | 8.8    | 8.7    | 8.5    | 8.8    | 8.3    |
| Zr     | 47.2    | 45.6   | 45.1    | 41.9   | 40.5   | 40.3   | 88.3   | 85.6   | 89.9   | 87.9   | 90.1   | 86.4   | 166.4  | 161.7  |
| Nb     | 1.43    | 1.44   | 1.33    | 1.60   | 1.48   | 1.47   | 2.86   | 2.86   | 2.95   | 2.90   | 2.93   | 2.76   | 3.86   | 3.84   |
| Mo     | 0.42    | 0.33   | 0.22    | 0.16   | 0.14   | 0.15   | 2.65   | 2.26   | 2.87   | 2.51   | 2.44   | 2.05   | 11.05  | 10.71  |
| Ag     | 0.03    | 0.03   | 0.03    | 0.03   | 0.02   | 0.02   | 4.72   | 5.65   | 4.66   | 5.21   | 4.90   | 4.35   | 0.52   | 0.54   |
| Cd     | <0.185  | <0.32  | <0.28   | <0.22  | <0.205 | <0.28  | <0.29  | <0.26  | <0.42  | <0.21  | <0.36  | 0.46   | <0.35  | <0.173 |
| In     | <0.0055 | 0.01   | 0.01    | 0.01   | 0.01   | 0.01   | 4.86   | 5.06   | 4.64   | 4.94   | 4.89   | 4.90   | 2.56   | 2.63   |
| Sn     | 1       | 1      | 1       | 1      | 1      | 1      | 1224   | 1226   | 1164   | 1219   | 1228   | 1198   | 49     | 51     |
| Sb     | 0       | 0      | <0.120  | <0.254 | <0.151 | <0.106 | 2072   | 2055   | 2061   | 2120   | 2160   | 2211   | 24     | 25     |
| Cs     | 0.146   | 0.096  | 0.117   | 0.071  | 0.052  | 0.051  | 0.329  | 0.308  | 0.287  | 0.333  | 0.300  | 0.310  | 0.073  | 0.074  |
| Ba     | 205     | 203    | 196     | 225    | 222    | 217    | 268    | 262    | 279    | 272    | 272    | 273    | 359    | 354    |
| La     | 6.690   | 6.330  | 6.330   | 7.230  | 6.860  | 6.770  | 9.000  | 8.660  | 9.490  | 9.110  | 9.310  | 9.060  | 8.740  | 8.660  |
| Ce     | 11.890  | 11.960 | 11.500  | 13.330 | 12.900 | 13.110 | 15.140 | 15.240 | 16.250 | 15.790 | 15.900 | 15.310 | 15.600 | 15.270 |
| Pr     | 1.496   | 1.410  | 1.396   | 1.627  | 1.519  | 1.495  | 2.020  | 1.939  | 2.014  | 2.026  | 2.005  | 1.951  | 1.940  | 1.890  |
| Nd     | 6.500   | 6.110  | 6.180   | 6.780  | 7.050  | 6.520  | 8.640  | 7.970  | 8.220  | 8.100  | 8.370  | 7.890  | 7.770  | 7.910  |
| Sm     | 1.520   | 1.370  | 1.170   | 1.440  | 1.530  | 1.340  | 1.840  | 1.570  | 1.810  | 1.690  | 1.900  | 1.620  | 1.560  | 1.780  |
| Eu     | 0.431   | 0.377  | 0.335   | 0.491  | 0.374  | 0.336  | 0.413  | 0.421  | 0.436  | 0.478  | 0.457  | 0.461  | 0.454  | 0.438  |
| Gd     | 1.210   | 1.330  | 1.006   | 1.170  | 1.300  | 1.260  | 1.540  | 1.330  | 1.560  | 1.600  | 1.650  | 1.360  | 1.630  | 1.620  |
| Tb     | 0.176   | 0.186  | 0.168   | 0.212  | 0.200  | 0.190  | 0.214  | 0.252  | 0.240  | 0.220  | 0.245  | 0.241  | 0.276  | 0.208  |
| Dy     | 1.166   | 1.107  | 1.126   | 1.400  | 1.195  | 1.168  | 1.500  | 1.375  | 1.700  | 1.500  | 1.750  | 1.640  | 1.650  | 1.490  |
| Ho     | 0.238   | 0.212  | 0.197   | 0.278  | 0.320  | 0.263  | 0.323  | 0.315  | 0.338  | 0.298  | 0.300  | 0.373  | 0.256  | 0.324  |
| Er     | 0.578   | 0.647  | 0.595   | 0.728  | 0.686  | 0.675  | 0.762  | 0.825  | 0.854  | 0.833  | 0.867  | 0.950  | 0.841  | 0.799  |
| Tm     | 0.084   | 0.096  | 0.074   | 0.102  | 0.085  | 0.090  | 0.120  | 0.126  | 0.122  | 0.122  | 0.126  | 0.129  | 0.131  | 0.112  |
| Yb     | 0.758   | 0.612  | 0.490   | 0.559  | 0.713  | 0.543  | 0.810  | 0.807  | 0.930  | 0.773  | 0.763  | 0.920  | 0.742  | 0.980  |
| Lu     | 0.086   | 0.075  | 0.093   | 0.113  | 0.089  | 0.096  | 0.151  | 0.126  | 0.130  | 0.132  | 0.124  | 0.116  | 0.136  | 0.127  |
| Hf     | 1.090   | 1.050  | 0.968   | 0.930  | 0.878  | 0.980  | 1.950  | 2.350  | 2.240  | 2.350  | 2.300  | 2.170  | 3.590  | 3.810  |
| Ta     | 0.107   | 0.087  | 0.070   | 0.086  | 0.107  | 0.082  | 0.189  | 0.164  | 0.173  | 0.164  | 0.184  | 0.186  | 0.223  | 0.242  |
| W      | 0.135   | 0.101  | 0.076   | 0.055  | 0.047  | 0.045  | 1.300  | 1.170  | 1.220  | 1.180  | 1.210  | 1.120  | 0.377  | 0.354  |
| Au     | <0.00   | <0.00  | <0.00   | 0.006  | <0.00  | <0.00  | 1.205  | 1.640  | 1.770  | 2.780  | 1.240  | 1.540  | 0.016  | <0.00  |
| Tl     | 0.013   | 0.003  | <0.0138 | 0.007  | 0.003  | 0.007  | 0.021  | 0.028  | 0.040  | 0.032  | 0.017  | 0.046  | 0.087  | 0.106  |
| Pb     | 9       | 8      | 8       | 4      | 4      | 4      | 13196  | 13165  | 13074  | 12957  | 12391  | 12210  | 12749  | 12979  |
| Th     | 0.893   | 0.683  | 0.773   | 0.713  | 0.834  | 0.879  | 1.800  | 1.850  | 1.800  | 1.800  | 1.990  | 1.880  | 1.700  | 1.790  |
| U      | 0.560   | 0.622  | 0.558   | 0.850  | 0.772  | 0.776  | 1.160  | 1.220  | 1.180  | 1.180  | 1.300  | 1.110  | 0.990  | 1.130  |

(continued)

| Sample | SPC 22<br>Blue | SPC 22<br>Blue | SPC 22<br>Blue | SPC 22<br>Blue | SPC 22<br>Green | SPC 23 | SPC 23 | SPC 23 |
|--------|----------------|----------------|----------------|----------------|-----------------|-----------------|-----------------|-----------------|-----------------|-----------------|--------|--------|--------|
| Li     | 4.38           | 5.05           | 5.06           | 5.21           | 4.59            | 4.55            | 4.33            | 4.7             | 5.11            | 5.54            | 4.53   | 4.21   | 4.42   |
| Be     | 0.272          | 0.142          | 0.176          | 0.236          | 0.17            | 0.41            | 0.33            | 0.27            | 0.46            | 0.3             | 0.29   | 0.073  | 0.146  |
| B      | 193.8          | 250.7          | 248.5          | 242.2          | 200.6           | 195.9           | 201.9           | 291.4           | 279.9           | 278.8           | 250.4  | 230.4  | 231.9  |
| Sc     | 4.2            | 4.3            | 4.3            | 4.3            | 4.0             | 3.8             | 3.9             | 4.0             | 3.9             | 3.9             | 4.5    | 4.4    | 4.2    |
| Ti     | 1854           | 1832           | 1836           | 1782           | 1994            | 1928            | 1957            | 1995            | 1975            | 2042            | 524    | 571    | 482    |
| V      | 37             | 36             | 37             | 36             | 35              | 34              | 34              | 35              | 35              | 36              | 16     | 16     | 15     |
| Cr     | 40             | 40             | 52             | 38             | 40              | 39              | 40              | 41              | 41              | 41              | 12     | 14     | 11     |
| Co     | 1072           | 1114           | 1408           | 1096           | 8               | 7               | 7               | 8               | 8               | 8               | 379    | 405    | 464    |
| Ni     | 176            | 184            | 505            | 176            | 13              | 13              | 13              | 13              | 13              | 13              | 21     | 21     | 22     |
| Cu     | 6238           | 6422           | 6212           | 6254           | 34              | 36              | 35              | 37              | 35              | 36              | 937    | 928    | 1005   |
| Zn     | 356            | 345            | 371            | 336            | 24              | 22              | 23              | 25              | 23              | 24              | 31     | 31     | 32     |
| Ga     | 7.4            | 7.7            | 8.7            | 7.6            | 3.2             | 3.3             | 3.2             | 3.6             | 3.5             | 3.6             | 3.3    | 3.2    | 3.3    |
| Ge     | 6.76           | 6.65           | 6.92           | 6.35           | 1.35            | 1.1             | 1.3             | 1.42            | 0.81            | 0.83            | 2.11   | 1.32   | 2.33   |
| As     | 101.3          | 104.3          | 105.2          | 104.7          | 2.5             | 2.3             | 2.3             | 2.6             | 2.4             | 2.5             | 23.7   | 24.3   | 26.5   |
| Rb     | 5.1            | 5.0            | 5.1            | 5.0            | 4.8             | 4.7             | 4.6             | 5.0             | 4.8             | 4.9             | 8.1    | 7.8    | 8.2    |
| Sr     | 417            | 425            | 429            | 424            | 410             | 398             | 399             | 419             | 415             | 429             | 451    | 479    | 418    |
| Y      | 8.3            | 8.4            | 8.5            | 8.2            | 8.5             | 8.2             | 8.3             | 8.7             | 8.6             | 8.7             | 6.5    | 6.6    | 6.2    |
| Zr     | 159.0          | 161.1          | 162.6          | 160.4          | 179.9           | 173.3           | 174.9           | 180.6           | 179.5           | 185.0           | 56.0   | 58.2   | 51.0   |
| Nb     | 3.79           | 3.86           | 3.80           | 3.69           | 3.97            | 3.88            | 3.87            | 4.13            | 4.07            | 4.09            | 1.59   | 1.67   | 1.44   |
| Mo     | 11.48          | 11.57          | 11.65          | 10.86          | 4.41            | 4.77            | 4.31            | 4.89            | 4.86            | 4.96            | 2.06   | 2.15   | 1.96   |
| Ag     | 0.51           | 0.54           | 0.57           | 0.61           | 0.02            | 0.04            | 0.04            | 0.02            | 0.04            | 0.02            | 0.55   | 0.64   | 0.48   |
| Cd     | <0.29          | <0.187         | <0.25          | <0.202         | <0.34           | <0.214          | <0.35           | <0.229          | <0.35           | <0.26           | <0.26  | <0.32  | <0.30  |
| In     | 2.67           | 2.71           | 3.13           | 2.73           | 0.01            | 0.02            | 0.01            | 0.02            | 0.01            | 0.01            | 0.54   | 0.50   | 0.57   |
| Sn     | 51             | 52             | 53             | 51             | 1               | 1               | 1               | 1               | 1               | 1               | 46     | 48     | 51     |
| Sb     | 25             | 26             | 25             | 26             | 0               | 0               | 0               | 1               | 1               | 0               | 7045   | 7647   | 9658   |
| Cs     | 0.062          | 0.068          | 0.065          | 0.054          | 0.048           | 0.037           | 0.048           | 0.055           | 0.065           | 0.042           | 0.132  | 0.124  | 0.116  |
| Ba     | 347            | 355            | 361            | 351            | 352             | 341             | 333             | 359             | 362             | 365             | 205    | 218    | 196    |
| La     | 8.500          | 8.470          | 8.750          | 8.760          | 8.840           | 8.560           | 8.510           | 9.080           | 8.840           | 8.830           | 6.690  | 6.380  | 6.060  |
| Ce     | 15.100         | 15.470         | 15.470         | 15.010         | 15.970          | 15.150          | 15.850          | 15.980          | 16.300          | 16.820          | 10.870 | 11.130 | 10.420 |
| Pr     | 1.870          | 1.960          | 1.950          | 2.000          | 1.920           | 1.860           | 1.860           | 2.010           | 1.990           | 2.090           | 1.407  | 1.416  | 1.378  |
| Nd     | 8.200          | 7.940          | 8.040          | 7.860          | 8.090           | 8.050           | 8.070           | 8.360           | 8.420           | 8.930           | 6.220  | 6.190  | 6.020  |
| Sm     | 1.650          | 1.540          | 1.720          | 1.890          | 1.490           | 1.670           | 1.550           | 1.770           | 1.560           | 1.880           | 1.260  | 1.270  | 1.080  |
| Eu     | 0.452          | 0.382          | 0.419          | 0.430          | 0.456           | 0.459           | 0.396           | 0.465           | 0.418           | 0.444           | 0.293  | 0.387  | 0.296  |
| Gd     | 1.570          | 1.510          | 1.380          | 1.430          | 1.730           | 1.540           | 1.570           | 1.520           | 1.580           | 1.600           | 1.110  | 1.150  | 1.060  |
| Tb     | 0.218          | 0.235          | 0.267          | 0.220          | 0.292           | 0.259           | 0.256           | 0.244           | 0.248           | 0.248           | 0.204  | 0.138  | 0.204  |
| Dy     | 1.450          | 1.510          | 1.590          | 1.490          | 1.610           | 1.410           | 1.500           | 1.790           | 1.550           | 1.560           | 1.032  | 1.220  | 1.087  |
| Ho     | 0.319          | 0.300          | 0.305          | 0.289          | 0.289           | 0.318           | 0.306           | 0.362           | 0.302           | 0.319           | 0.233  | 0.252  | 0.216  |
| Er     | 0.892          | 0.889          | 0.979          | 0.865          | 0.919           | 0.766           | 0.830           | 0.846           | 0.947           | 0.806           | 0.591  | 0.668  | 0.611  |
| Tm     | 0.118          | 0.121          | 0.138          | 0.143          | 0.129           | 0.130           | 0.125           | 0.158           | 0.124           | 0.140           | 0.106  | 0.074  | 0.070  |
| Yb     | 1.020          | 0.840          | 0.840          | 0.890          | 0.770           | 0.910           | 0.886           | 0.890           | 0.910           | 0.890           | 0.490  | 0.850  | 0.499  |
| Lu     | 0.136          | 0.140          | 0.164          | 0.116          | 0.146           | 0.112           | 0.140           | 0.147           | 0.127           | 0.160           | 0.078  | 0.086  | 0.071  |
| Hf     | 3.920          | 3.760          | 3.920          | 3.670          | 3.940           | 4.030           | 4.040           | 4.480           | 4.090           | 4.520           | 1.310  | 1.470  | 1.300  |
| Ta     | 0.249          | 0.186          | 0.275          | 0.254          | 0.209           | 0.231           | 0.199           | 0.240           | 0.241           | 0.277           | 0.122  | 0.129  | 0.113  |
| W      | 0.350          | 0.368          | 0.410          | 0.392          | 0.268           | 0.295           | 0.268           | 0.333           | 0.303           | 0.423           | 0.191  | 0.291  | 0.154  |
| Au     | 0.013          | 0.016          | 0.016          | 0.015          | <0.00           | <0.00           | <0.00           | <0.00           | <0.00           | <0.00           | 0.019  | 0.064  | 0.050  |
| Tl     | 0.105          | 0.056          | 0.078          | 0.084          | 0.036           | 0.045           | 0.031           | 0.056           | 0.038           | 0.027           | 0.067  | 0.036  | 0.046  |
| Pb     | 12926          | 13243          | 13345          | 13545          | 13              | 7               | 7               | 7               | 8               | 8               | 3366   | 3350   | 4113   |
| Th     | 1.700          | 1.700          | 1.650          | 1.710          | 1.750           | 1.690           | 1.780           | 1.930           | 1.600           | 1.960           | 0.956  | 0.909  | 0.861  |
| U      | 1.020          | 1.100          | 1.250          | 1.130          | 1.130           | 1.090           | 1.050           | 1.130           | 1.230           | 1.140           | 1.120  | 1.230  | 1.120  |

(continued)

| Sample | SPC 23 | SPC 24 | SPC 24 | SPC 24 | SPC 24 | SPC 25 | SPC 25 | SPC 25 | SPC 26 | SPC 26 | SPC 26 | SPC 27 | SPC 27 | SPC 27 | SPC 27 |
|--------|--------|--------|--------|--------|--------|--------|--------|--------|--------|--------|--------|--------|--------|--------|--------|
| Li     | 4.25   | 4.58   | 5.6    | 4.46   | 3.87   | 9.57   | 8.43   | 8.57   | 8.93   | 9      | 8.99   | 3.99   | 4.29   | 4.31   | 4.05   |
| Be     | 0.57   | 0.31   | 0.35   | 0.22   | 0.22   | 0.278  | 0.27   | 0.31   | 0.384  | 0.56   | 0.383  | 0.42   | 0.57   | 0.3    | 0.29   |
| B      | 152.2  | 221.7  | 209.9  | 187.5  | 186.8  | 152.3  | 144.1  | 149.7  | 205.9  | 201.3  | 203.4  | 65.4   | 59.2   | 56.0   | 66.9   |
| Sc     | 2.1    | 3.5    | 3.5    | 3.5    | 3.2    | 3.0    | 2.9    | 3.1    | 4.0    | 3.7    | 3.5    | 1.5    | 1.6    | 1.6    | 1.6    |
| Ti     | 496    | 332    | 350    | 360    | 392    | 891    | 846    | 888    | 932    | 903    | 901    | 422    | 408    | 424    | 445    |
| V      | 16     | 13     | 13     | 14     | 15     | 30     | 30     | 31     | 37     | 35     | 37     | 8      | 7      | 7      | 8      |
| Cr     | 11     | 10     | 11     | 12     | 12     | 16     | 17     | 16     | 18     | 19     | 17     | 13     | 14     | 11     | 17     |
| Co     | 382    | 13     | 13     | 16     | 16     | 8      | 8      | 8      | 9      | 9      | 9      | 2      | 2      | 2      | 2      |
| Ni     | 19     | 12     | 10     | 11     | 13     | 12     | 11     | 11     | 13     | 14     | 13     | 5      | 5      | 4      | 5      |
| Cu     | 1014   | 11098  | 9893   | 8400   | 9053   | 92     | 92     | 94     | 69     | 70     | 74     | 29     | 29     | 29     | 33     |
| Zn     | 33     | 40     | 31     | 48     | 59     | 23     | 24     | 23     | 25     | 24     | 25     | 10     | 9      | 9      | 9      |
| Ga     | 3.3    | 2.5    | 2.4    | 2.8    | 2.5    | 3.6    | 3.4    | 3.3    | 3.5    | 3.5    | 3.6    | 3.2    | 3.2    | 3.0    | 3.4    |
| Ge     | 1.96   | 1.14   | <0.62  | 1.04   | 0.9    | 1.73   | 1.5    | 0.96   | 1.44   | 1.45   | 1.25   | 0.84   | 1.17   | <0.73  | 0.97   |
| As     | 34.7   | 24.0   | 14.0   | 19.4   | 26.8   | 6.1    | 6.0    | 5.8    | 5.8    | 5.3    | 6.0    | 1.8    | 1.4    | 1.6    | 1.9    |
| Rb     | 8.6    | 9.3    | 9.5    | 14.9   | 14.9   | 7.7    | 7.8    | 7.6    | 7.4    | 7.3    | 7.7    | 7.6    | 7.7    | 7.8    | 8.0    |
| Sr     | 410    | 403    | 460    | 438    | 448    | 763    | 745    | 776    | 767    | 757    | 747    | 476    | 471    | 471    | 500    |
| Y      | 6.2    | 6.7    | 6.9    | 7.0    | 7.4    | 8.1    | 7.9    | 8.2    | 8.4    | 8.1    | 8.0    | 7.3    | 7.2    | 7.3    | 7.4    |
| Zr     | 49.9   | 36.0   | 39.0   | 38.7   | 39.0   | 79.2   | 77.1   | 79.5   | 86.3   | 81.5   | 80.5   | 42.8   | 41.9   | 41.9   | 44.4   |
| Nb     | 1.47   | 1.22   | 1.26   | 1.26   | 1.36   | 2.62   | 2.58   | 2.65   | 2.74   | 2.67   | 2.69   | 1.44   | 1.44   | 1.49   | 1.55   |
| Mo     | 1.74   | 1.80   | 1.87   | 1.52   | 1.66   | 3.49   | 3.36   | 3.54   | 3.82   | 3.42   | 3.62   | 0.23   | 0.20   | 0.21   | 0.27   |
| Ag     | 0.57   | 5.04   | 5.77   | 4.76   | 4.47   | 0.07   | 0.07   | 0.07   | 0.14   | 0.12   | 0.12   | 0.06   | 0.04   | 0.05   | 0.04   |
| Cd     | <0.39  | 0.23   | <0.34  | <0.23  | 0.26   | <0.264 | <0.25  | <0.210 | 0.20   | <0.27  | <0.28  | <0.22  | <0.29  | <0.31  | <0.32  |
| In     | 0.56   | 3.28   | 2.01   | 2.08   | 2.90   | 0.03   | 0.04   | 0.06   | 0.09   | 0.05   | 0.06   | 0.30   | 0.18   | 0.10   | 0.34   |
| Sn     | 48     | 872    | 495    | 538    | 730    | 8      | 8      | 8      | 13     | 13     | 13     | 75     | 45     | 25     | 91     |
| Sb     | 10047  | 3746   | 2136   | 3432   | 4461   | 220    | 225    | 229    | 97     | 91     | 94     | 30     | 19     | 11     | 39     |
| Cs     | 0.111  | 0.094  | 0.095  | 0.364  | 0.354  | 0.112  | 0.103  | 0.110  | 0.089  | 0.090  | 0.122  | 0.103  | 0.078  | 0.089  | 0.095  |
| Ba     | 194    | 225    | 253    | 247    | 255    | 405    | 392    | 409    | 374    | 373    | 373    | 227    | 229    | 227    | 235    |
| La     | 6.190  | 5.900  | 6.710  | 6.640  | 7.170  | 8.180  | 8.000  | 8.090  | 8.130  | 7.990  | 8.010  | 6.780  | 6.930  | 6.750  | 7.080  |
| Ce     | 10.430 | 10.260 | 11.560 | 10.980 | 11.790 | 13.620 | 13.140 | 13.730 | 14.200 | 13.810 | 13.620 | 12.710 | 12.650 | 12.480 | 13.530 |
| Pr     | 1.355  | 1.366  | 1.494  | 1.405  | 1.573  | 1.750  | 1.740  | 1.780  | 1.860  | 1.770  | 1.780  | 1.600  | 1.630  | 1.570  | 1.560  |
| Nd     | 5.980  | 5.710  | 6.310  | 6.300  | 6.550  | 7.620  | 7.830  | 7.350  | 7.360  | 7.420  | 7.560  | 6.680  | 6.730  | 6.740  | 6.740  |
| Sm     | 1.140  | 1.050  | 1.030  | 1.280  | 1.340  | 1.520  | 1.360  | 1.480  | 1.370  | 1.550  | 1.310  | 1.320  | 1.470  | 1.130  | 1.110  |
| Eu     | 0.345  | 0.368  | 0.382  | 0.499  | 0.398  | 0.392  | 0.389  | 0.508  | 0.445  | 0.445  | 0.388  | 0.379  | 0.355  | 0.424  | 0.402  |
| Gd     | 1.030  | 1.150  | 1.420  | 1.230  | 1.330  | 1.280  | 1.370  | 1.550  | 1.380  | 1.230  | 1.450  | 1.110  | 1.180  | 1.320  | 1.370  |
| Tb     | 0.185  | 0.174  | 0.214  | 0.196  | 0.209  | 0.223  | 0.217  | 0.252  | 0.243  | 0.195  | 0.198  | 0.218  | 0.181  | 0.193  | 0.207  |
| Dy     | 1.101  | 0.998  | 1.290  | 1.260  | 1.030  | 1.440  | 1.280  | 1.260  | 1.430  | 1.350  | 1.310  | 1.260  | 1.180  | 1.100  | 1.160  |
| Ho     | 0.215  | 0.219  | 0.221  | 0.245  | 0.278  | 0.301  | 0.289  | 0.346  | 0.305  | 0.296  | 0.271  | 0.264  | 0.253  | 0.238  | 0.242  |
| Er     | 0.659  | 0.488  | 0.750  | 0.584  | 0.623  | 0.757  | 0.764  | 0.880  | 0.929  | 0.803  | 0.831  | 0.682  | 0.790  | 0.631  | 0.704  |
| Tm     | 0.101  | 0.076  | 0.108  | 0.080  | 0.111  | 0.115  | 0.101  | 0.124  | 0.113  | 0.122  | 0.115  | 0.083  | 0.122  | 0.091  | 0.106  |
| Yb     | 0.571  | 0.642  | 0.580  | 0.690  | 0.514  | 0.664  | 0.740  | 0.810  | 0.796  | 0.860  | 0.757  | 0.624  | 0.650  | 0.584  | 0.600  |
| Lu     | 0.083  | 0.066  | 0.107  | 0.112  | 0.091  | 0.096  | 0.101  | 0.107  | 0.137  | 0.097  | 0.111  | 0.092  | 0.081  | 0.082  | 0.093  |
| Hf     | 1.110  | 0.905  | 1.250  | 1.060  | 0.950  | 1.770  | 2.140  | 1.900  | 2.120  | 1.950  | 1.910  | 1.240  | 1.170  | 1.130  | 1.080  |
| Ta     | 0.089  | 0.070  | 0.059  | 0.086  | 0.092  | 0.147  | 0.125  | 0.148  | 0.161  | 0.136  | 0.136  | 0.091  | 0.097  | 0.083  | 0.097  |
| W      | 0.267  | 0.080  | 0.031  | 0.108  | 0.078  | 0.191  | 0.115  | 0.179  | 0.334  | 0.282  | 0.370  | 0.050  | 0.115  | 0.126  | 0.085  |
| Au     | 0.033  | 0.076  | 0.072  | 0.038  | 0.069  | 0.010  | 0.007  | <0.00  | 0.008  | 0.015  | <0.00  | 0.038  | 0.023  | 0.048  | 0.047  |
| Tl     | 0.080  | 0.028  | 0.054  | 0.021  | 0.030  |        |        |        |        |        |        |        |        |        |        |
| Pb     | 2499   | 447    | 335    | 243    | 376    | 70     | 70     | 69     | 125    | 115    | 118    | 411    | 297    | 320    | 446    |
| Th     | 0.874  | 0.729  | 0.784  | 0.819  | 0.833  | 1.290  | 1.160  | 1.300  | 1.420  | 1.300  | 1.310  | 0.890  | 0.850  | 0.799  | 0.789  |
| U      | 0.910  | 0.749  | 0.830  | 0.816  | 0.920  | 1.166  | 1.048  | 1.202  | 1.163  | 1.261  | 1.327  | 0.816  | 0.786  | 0.664  | 0.780  |

(continued)

| Sample | SPC 29  | SPC 29 | SPC 29 | SPC 30  | SPC 31  | SPC 31 | SPC 31 | SPC 31 | SPC 32 | SPC 32  | SPC 32 | SPC 32  | SPC 33 | SPC 33 |
|--------|---------|--------|--------|---------|---------|--------|--------|--------|--------|---------|--------|---------|--------|--------|
| Li     | 4.61    | 4.78   | 4.1    | 2189.00 | 2215.95 | 5.5    | 5.67   | 5.26   | 3.91   | 4.36    | 4.07   | 3.97    | 6.92   | 7.08   |
| Be     | 0.167   | 0.202  | 0.34   | 1.18    | 1.62    | 0.081  | 0.249  | 0.54   | 0.49   | 0.306   | 0.297  | 0.25    | 0.44   | 0.31   |
| B      | 65.2    | 67.8   | 70.3   | 28.0    | 33.3    | 159.0  | 154.8  | 155.5  | 75.4   | 72.8    | 78.7   | 75.3    | 149.3  | 154.5  |
| Sc     | 2.0     | 1.9    | 2.2    | 0.9     | 1.1     | 2.7    | 2.6    | 2.6    | 2.2    | 2.2     | 2.1    | 2.0     | 3.3    | 3.4    |
| Ti     | 462     | 454    | 534    | 118     | 132     | 852    | 867    | 831    | 423    | 427     | 432    | 411     | 996    | 996    |
| V      | 9       | 9      | 11     | 3       | 5       | 20     | 20     | 20     | 8      | 8       | 8      | 8       | 33     | 34     |
| Cr     | 14      | 12     | 22     | 6       | 8       | 15     | 16     | 15     | 13     | 12      | 13     | 12      | 18     | 18     |
| Co     | 3       | 3      | 4      | 2       | 6       | 268    | 245    | 240    | 1      | 1       | 1      | 1       | 6      | 6      |
| Ni     | 6       | 6      | 23     | 45      | 53      | 98     | 88     | 89     | 3      | 4       | 3      | 3       | 18     | 18     |
| Cu     | 104     | 106    | 107    | 4       | 8       | 851    | 858    | 838    | 12     | 12      | 11     | 12      | 47     | 48     |
| Zn     | 14      | 15     | 21     | 28      | 36      | 27     | 25     | 26     | 5      | 5       | 5      | 5       | 37     | 38     |
| Ga     | 2.9     | 3.3    | 3.4    | 2.2     | 2.7     | 4.3    | 4.1    | 4.2    | 2.9    | 2.8     | 2.7    | 2.7     | 3.5    | 3.4    |
| Ge     | <0.62   | 1.08   | <0.68  | 1.09    | 1.13    | 3.14   | 3.1    | 3.33   | 0.6    | 0.63    | <0.71  | <0.72   | 1.42   | 1.81   |
| As     | 2.2     | 2.8    | 2.7    | 3.7     | 4.0     | 20.6   | 19.7   | 19.2   | 1.5    | 1.3     | 1.0    | 1.1     | 5.3    | 5.2    |
| Rb     | 9.6     | 9.7    | 9.5    | 79.1    | 82.5    | 7.0    | 7.0    | 6.9    | 8.6    | 8.5     | 8.5    | 8.5     | 7.6    | 7.6    |
| Sr     | 449     | 449    | 438    | 889     | 914     | 577    | 573    | 559    | 368    | 360     | 353    | 369     | 870    | 891    |
| Y      | 6.8     | 7.2    | 7.2    | 3.5     | 3.8     | 7.1    | 7.3    | 7.2    | 6.5    | 6.2     | 6.2    | 6.2     | 8.3    | 8.4    |
| Zr     | 44.3    | 44.3   | 48.8   | 65.0    | 69.0    | 87.5   | 86.6   | 85.1   | 40.2   | 40.8    | 39.5   | 40.2    | 95.2   | 97.2   |
| Nb     | 1.40    | 1.60   | 1.74   | 1.13    | 1.14    | 2.60   | 2.71   | 2.67   | 1.45   | 1.42    | 1.42   | 1.39    | 2.96   | 3.12   |
| Mo     | 0.28    | 0.30   | 0.51   | 2.11    | 2.21    | 2.89   | 2.41   | 2.65   | 0.37   | 0.43    | 0.42   | 0.41    | 4.54   | 4.26   |
| Ag     | 0.10    | 0.09   | 0.07   | 0.01    | 0.04    | 0.10   | 0.15   | 0.11   | 0.02   | 0.02    | 0.02   | 0.05    | 0.08   | 0.07   |
| Cd     | <0.28   | <0.286 | <0.33  | <0.50   | <0.50   | <0.29  | <0.35  | <0.27  | <0.26  | <0.31   | <0.31  | <0.31   | <0.29  | <0.28  |
| In     | 0.26    | 0.29   | 0.34   | <0.0097 | <0.0097 | 0.50   | 0.43   | 0.37   | 0.01   | <0.0092 | 0.01   | 0.01    | 0.02   | 0.04   |
| Sn     | 77      | 68     | 83     | 1       | 1       | 32     | 29     | 28     | 1      | 1       | 1      | 1       | 4      | 4      |
| Sb     | 92      | 93     | 118    | 1898    | 1937    | 183    | 185    | 179    | <0.089 | <0.069  | <0.096 | 0       | 52     | 53     |
| Cs     | 0.130   | 0.148  | 0.175  | 31.270  | 35.550  | 0.087  | 0.106  | 0.105  | 0.091  | 0.077   | 0.084  | 0.091   | 0.142  | 0.144  |
| Ba     | 222     | 223    | 221    | 124984  | 125596  | 177    | 178    | 172    | 207    | 205     | 205    | 206     | 259    | 267    |
| La     | 6.580   | 6.630  | 7.120  | 1.299   | 1.386   | 7.800  | 7.740  | 7.680  | 6.020  | 6.030   | 5.860  | 6.000   | 8.400  | 9.040  |
| Ce     | 11.990  | 12.070 | 13.290 | 2.350   | 2.210   | 13.340 | 13.470 | 12.860 | 10.730 | 10.940  | 10.690 | 10.770  | 14.750 | 14.960 |
| Pr     | 1.517   | 1.476  | 1.643  | 0.279   | 0.256   | 1.693  | 1.716  | 1.661  | 1.425  | 1.295   | 1.292  | 1.301   | 1.862  | 1.950  |
| Nd     | 6.260   | 6.190  | 6.920  | 1.335   | 0.920   | 6.980  | 7.560  | 6.960  | 5.870  | 5.880   | 5.870  | 5.780   | 7.730  | 8.190  |
| Sm     | 1.510   | 1.430  | 1.290  | 0.515   | 0.179   | 1.380  | 1.420  | 1.310  | 1.160  | 1.310   | 1.160  | 1.400   | 1.560  | 1.600  |
| Eu     | 0.360   | 0.430  | 0.370  | 1.045   | 0.942   | 0.388  | 0.400  | 0.361  | 0.328  | 0.356   | 0.318  | 0.276   | 0.374  | 0.376  |
| Gd     | 1.380   | 1.080  | 1.170  | 0.473   | 0.332   | 1.190  | 1.390  | 1.090  | 0.980  | 1.150   | 1.080  | 1.170   | 1.140  | 1.450  |
| Tb     | 0.192   | 0.183  | 0.201  | 0.048   | 0.013   | 0.208  | 0.234  | 0.210  | 0.168  | 0.164   | 0.182  | 0.210   | 0.225  | 0.250  |
| Dy     | 1.137   | 1.061  | 1.271  | 0.279   | 0.247   | 1.300  | 1.330  | 1.300  | 0.928  | 1.071   | 1.122  | 0.927   | 1.344  | 1.640  |
| Ho     | 0.269   | 0.293  | 0.224  | 0.061   | 0.051   | 0.276  | 0.264  | 0.264  | 0.210  | 0.238   | 0.212  | 0.224   | 0.270  | 0.282  |
| Er     | 0.644   | 0.660  | 0.617  | 0.207   | 0.183   | 0.803  | 0.714  | 0.807  | 0.568  | 0.682   | 0.614  | 0.598   | 0.837  | 0.826  |
| Tm     | 0.094   | 0.098  | 0.119  | 0.041   | 0.020   | 0.116  | 0.092  | 0.093  | 0.075  | 0.083   | 0.108  | 0.078   | 0.142  | 0.104  |
| Yb     | 0.709   | 0.611  | 0.738  | 0.223   | 0.179   | 0.702  | 0.753  | 0.805  | 0.563  | 0.507   | 0.549  | 0.667   | 0.755  | 0.910  |
| Lu     | 0.112   | 0.074  | 0.091  | 0.031   | 0.025   | 0.094  | 0.091  | 0.119  | 0.086  | 0.091   | 0.068  | 0.072   | 0.130  | 0.092  |
| Hf     | 1.070   | 1.150  | 1.260  | 1.799   | 1.641   | 2.090  | 2.210  | 2.060  | 1.030  | 0.964   | 1.150  | 0.860   | 2.080  | 2.290  |
| Ta     | 0.077   | 0.077  | 0.089  | 1.453   | 1.547   | 0.167  | 0.163  | 0.159  | 0.063  | 0.106   | 0.075  | 0.085   | 0.188  | 0.173  |
| W      | 0.071   | 0.078  | 0.137  | 0.185   | 0.161   | 0.265  | 0.211  | 0.222  | 0.121  | 0.099   | 0.051  | 0.054   | 0.200  | 0.240  |
| Au     | 0.047   | 0.026  | 0.044  | <0.00   | <0.00   | 0.013  | <0.00  | 0.016  | <0.00  | <0.00   | <0.00  | <0.00   | <0.00  | 0.006  |
| Tl     | <0.0125 | <0.00  | 0.003  | 0.166   | 0.148   | 0.008  | 0.003  | 0.013  | 0.006  | 0.012   | 0.020  | <0.0158 | 0.040  | 0.027  |
| Pb     | 268     | 273    | 291    | 57      | 54      | 2807   | 2611   | 2543   | 3      | 4       | 3      | 4       | 41     | 42     |
| Th     | 0.847   | 0.864  | 1.025  | 0.454   | 0.430   | 1.350  | 1.350  | 1.220  | 0.901  | 0.795   | 0.749  | 0.812   | 1.600  | 1.490  |
| U      | 0.657   | 0.761  | 0.738  | 0.336   | 0.270   | 1.400  | 1.460  | 1.430  | 0.758  | 0.811   | 0.773  | 0.810   | 1.120  | 1.100  |

(continued)

| Sample | SPC 33 | SPC 33 | SPC 34 | SPC 34 | SPC 34 | SPC 35  | SPC 35  | SPC 35 | SPC 36 | SPC 36 | SPC 36 | SPC 37 | SPC 37 | SPC 37 |
|--------|--------|--------|--------|--------|--------|---------|---------|--------|--------|--------|--------|--------|--------|--------|
| Li     | 7.43   | 7.19   | 6.23   | 6.52   | 6.72   | 3.18    | 3.09    | 3.56   | 3.97   | 3.88   | 4.02   | 24.39  | 24.39  | 22.93  |
| Be     | 0.36   | 0.32   | 0.36   | 0.282  | 0.56   | 0.43    | 0.32    | 0.39   | 0.5    | 0.32   | 0.17   | 0.29   | 0.38   | 0.42   |
| B      | 152.5  | 149.7  | 143.8  | 151.7  | 142.6  | 131.1   | 135.2   | 141.0  | 136.9  | 140.6  | 148.0  | 101.2  | 97.4   | 96.6   |
| Sc     | 3.2    | 3.3    | 2.6    | 2.4    | 2.5    | 2.5     | 2.6     | 2.5    | 2.3    | 2.4    | 2.3    | 1.7    | 1.8    | 1.7    |
| Ti     | 999    | 991    | 715    | 711    | 718    | 311     | 330     | 333    | 892    | 913    | 878    | 549    | 543    | 553    |
| V      | 35     | 34     | 24     | 24     | 24     | 9       | 9       | 9      | 13     | 13     | 13     | 12     | 12     | 12     |
| Cr     | 19     | 19     | 13     | 13     | 13     | 9       | 11      | 11     | 17     | 19     | 18     | 35     | 37     | 36     |
| Co     | 6      | 5      | 47     | 47     | 46     | 3       | 3       | 3      | 3      | 3      | 3      | 11     | 11     | 11     |
| Ni     | 17     | 17     | 20     | 20     | 20     | 5       | 5       | 4      | 5      | 6      | 5      | 10     | 11     | 11     |
| Cu     | 49     | 49     | 1391   | 1407   | 1391   | 12      | 13      | 13     | 18     | 18     | 18     | 1514   | 1530   | 1564   |
| Zn     | 37     | 36     | 373    | 384    | 380    | 8       | 9       | 9      | 26     | 27     | 26     | 315    | 321    | 322    |
| Ga     | 3.3    | 3.3    | 2.8    | 2.8    | 2.7    | 2.7     | 2.5     | 2.6    | 2.0    | 2.4    | 2.2    | 1.8    | 1.7    | 1.8    |
| Ge     | 1.09   | 1.54   | 0.96   | 1.62   | 1.35   | 0.88    | 1.22    | <0.64  | 0.91   | 1.26   | 1.18   | 0.95   | 1.3    | 1.37   |
| As     | 5.1    | 5.9    | 10.0   | 9.6    | 8.9    | 1.3     | 1.4     | 1.5    | 1.5    | 0.8    | 1.1    | 27.1   | 27.9   | 30.0   |
| Rb     | 7.8    | 7.7    | 7.0    | 7.0    | 6.7    | 5.8     | 5.8     | 6.1    | 4.1    | 4.4    | 4.0    | 19.3   | 19.2   | 19.8   |
| Sr     | 872    | 895    | 580    | 575    | 578    | 378     | 378     | 389    | 143    | 151    | 145    | 631    | 626    | 640    |
| Y      | 8.5    | 8.5    | 6.9    | 6.8    | 6.9    | 6.1     | 6.2     | 6.5    | 5.3    | 5.6    | 5.3    | 4.5    | 4.6    | 4.5    |
| Zr     | 94.3   | 97.6   | 68.3   | 67.6   | 69.0   | 34.2    | 34.8    | 35.5   | 83.2   | 86.6   | 83.7   | 80.7   | 81.2   | 81.1   |
| Nb     | 3.06   | 3.04   | 2.21   | 2.19   | 2.20   | 1.08    | 1.11    | 1.12   | 2.14   | 2.24   | 2.26   | 2.04   | 2.03   | 2.07   |
| Mo     | 4.45   | 4.38   | 3.10   | 2.83   | 2.71   | 0.52    | 0.39    | 0.62   | 0.11   | 0.15   | 0.16   | 1.35   | 1.13   | 1.31   |
| Ag     | 0.08   | 0.07   | 3.22   | 3.20   | 3.25   | <0.0114 | <0.0109 | 0.04   | 0.11   | 0.07   | 0.09   | 1.87   | 1.82   | 1.84   |
| Cd     | <0.29  | <0.32  | <0.23  | <0.204 | <0.37  | <0.210  | <0.32   | <0.26  | <0.19  | <0.194 | <0.34  | <0.29  | 0.20   | <0.34  |
| In     | 0.04   | 0.02   | 8.82   | 9.16   | 9.06   | 0.01    | 0.01    | 0.01   | 0.04   | 0.01   | 0.06   | 0.50   | 0.50   | 0.53   |
| Sn     | 5      | 4      | 2180   | 2291   | 2266   | 2       | 2       | 2      | 7      | 7      | 14     | 61     | 61     | 63     |
| Sb     | 51     | 52     | 127    | 129    | 127    | 269     | 293     | 297    | 11     | 22     | 17     | 14     | 14     | 14     |
| Cs     | 0.103  | 0.119  | 0.100  | 0.115  | 0.100  | 0.048   | 0.057   | 0.055  | 0.039  | 0.062  | 0.038  | 0.454  | 0.373  | 0.393  |
| Ba     | 260    | 267    | 265    | 264    | 266    | 201     | 202     | 207    | 113    | 118    | 113    | 223    | 225    | 229    |
| La     | 8.730  | 8.860  | 6.980  | 7.210  | 6.970  | 5.920   | 5.850   | 6.100  | 5.620  | 5.820  | 5.630  | 5.620  | 5.540  | 5.650  |
| Ce     | 15.090 | 14.980 | 11.590 | 11.510 | 11.840 | 10.400  | 10.290  | 10.660 | 10.160 | 10.550 | 10.190 | 9.450  | 9.280  | 9.290  |
| Pr     | 1.882  | 1.960  | 1.473  | 1.505  | 1.625  | 1.329   | 1.327   | 1.345  | 1.273  | 1.330  | 1.293  | 1.257  | 1.169  | 1.282  |
| Nd     | 8.160  | 8.060  | 6.520  | 6.570  | 6.520  | 5.570   | 5.820   | 6.290  | 5.400  | 5.650  | 5.630  | 4.680  | 5.290  | 5.380  |
| Sm     | 1.930  | 1.530  | 1.430  | 1.410  | 1.180  | 1.240   | 1.270   | 1.350  | 1.130  | 1.210  | 1.110  | 1.010  | 1.100  | 1.070  |
| Eu     | 0.399  | 0.437  | 0.337  | 0.375  | 0.344  | 0.346   | 0.337   | 0.373  | 0.308  | 0.323  | 0.260  | 0.199  | 0.248  | 0.246  |
| Gd     | 1.280  | 1.490  | 1.140  | 1.130  | 1.080  | 1.110   | 0.994   | 1.030  | 0.970  | 1.170  | 1.030  | 0.800  | 0.770  | 0.890  |
| Tb     | 0.251  | 0.223  | 0.175  | 0.195  | 0.211  | 0.165   | 0.176   | 0.183  | 0.158  | 0.155  | 0.176  | 0.123  | 0.120  | 0.145  |
| Dy     | 1.550  | 1.380  | 1.209  | 1.224  | 1.380  | 1.028   | 1.093   | 1.063  | 1.010  | 0.940  | 0.920  | 0.681  | 0.745  | 0.930  |
| Ho     | 0.346  | 0.342  | 0.267  | 0.264  | 0.237  | 0.214   | 0.201   | 0.218  | 0.175  | 0.203  | 0.188  | 0.167  | 0.146  | 0.166  |
| Er     | 0.806  | 0.917  | 0.573  | 0.584  | 0.685  | 0.596   | 0.562   | 0.529  | 0.573  | 0.432  | 0.470  | 0.369  | 0.475  | 0.392  |
| Tm     | 0.101  | 0.116  | 0.099  | 0.098  | 0.111  | 0.095   | 0.076   | 0.070  | 0.084  | 0.085  | 0.078  | 0.066  | 0.064  | 0.064  |
| Yb     | 0.839  | 0.767  | 0.675  | 0.597  | 0.666  | 0.585   | 0.421   | 0.704  | 0.640  | 0.399  | 0.640  | 0.469  | 0.467  | 0.445  |
| Lu     | 0.112  | 0.141  | 0.093  | 0.103  | 0.091  | 0.082   | 0.070   | 0.077  | 0.099  | 0.081  | 0.088  | 0.069  | 0.077  | 0.067  |
| Hf     | 2.320  | 2.300  | 1.660  | 1.750  | 1.480  | 0.927   | 0.746   | 0.836  | 2.310  | 2.150  | 2.030  | 2.090  | 1.950  | 2.060  |
| Ta     | 0.158  | 0.181  | 0.121  | 0.114  | 0.134  | 0.068   | 0.062   | 0.071  | 0.152  | 0.157  | 0.127  | 0.137  | 0.132  | 0.128  |
| W      | 0.251  | 0.221  | 0.357  | 0.267  | 0.486  | 0.007   | 0.044   | 0.046  | 0.041  | 0.065  | 0.043  | 0.806  | 0.726  | 0.726  |
| Au     | <0.00  | 0.012  | 0.248  | 0.208  | 0.177  | 0.005   | <0.00   | 0.005  | <0.00  | <0.00  | <0.00  | <0.00  | 0.029  | 0.006  |
| Tl     | 0.042  | 0.034  | 0.065  | 0.051  | 0.041  | 0.017   | 0.025   | 0.003  |        |        |        |        |        |        |
| Pb     | 41     | 42     | 7164   | 8275   | 8041   | 16      | 15      | 18     | 69     | 71     | 79     | 276    | 279    | 283    |
| Th     | 1.465  | 1.417  | 1.109  | 1.131  | 1.146  | 0.748   | 0.762   | 0.848  | 1.020  | 1.190  | 1.070  | 1.410  | 1.330  | 1.460  |
| U      | 1.200  | 1.090  | 0.990  | 1.000  | 0.950  | 0.657   | 0.768   | 0.727  | 0.882  | 0.931  | 0.855  | 0.613  | 0.533  | 0.563  |

(continued)

| Sample | SPC 38  | SPC 39 | SPC 39 | SPC 39 | SPC 40 | SPC 40 | SPC 40 |
|--------|--------|--------|--------|--------|--------|---------|--------|--------|--------|--------|--------|--------|
| Li     | 6.1    | 4.86   | 5.34   | 6.32   | 5.78   | 5.06    | 6.87   | 5.98   | 6.45   | 5.03   | 4.71   | 4.34   |
| Be     | 0.33   | 0.46   | 0.32   | 0.206  | 0.29   | 0.29    | 0.31   | 0.32   | 0.37   | 0.43   | 0.33   | 0.27   |
| B      | 111.3  | 84.7   | 66.7   | 95.5   | 102.4  | 58.6    | 134.3  | 144.2  | 144.2  | 122.6  | 118.8  | 123.4  |
| Sc     | 1.9    | 1.4    | 1.9    | 2.3    | 2.1    | 1.8     | 2.2    | 2.5    | 2.5    | 2.2    | 2.2    | 2.3    |
| Ti     | 438    | 503    | 495    | 609    | 612    | 441     | 742    | 809    | 774    | 667    | 664    | 643    |
| V      | 19     | 12     | 10     | 15     | 16     | 8       | 20     | 21     | 21     | 18     | 18     | 18     |
| Cr     | 11     | 13     | 14     | 19     | 18     | 10      | 20     | 19     | 18     | 18     | 19     | 19     |
| Co     | 19     | 4      | 4      | 31     | 27     | 3       | 10     | 10     | 10     | 37     | 38     | 38     |
| Ni     | 14     | 5      | 6      | 13     | 13     | 4       | 15     | 14     | 15     | 19     | 20     | 20     |
| Cu     | 655    | 484    | 448    | 618    | 614    | 506     | 171    | 177    | 175    | 1045   | 1034   | 1023   |
| Zn     | 50     | 58     | 45     | 41     | 44     | 8       | 33     | 35     | 33     | 152    | 150    | 153    |
| Ga     | 2.7    | 3.4    | 2.8    | 2.8    | 2.8    | 2.9     | 2.9    | 3.2    | 3.0    | 3.2    | 3.0    | 3.0    |
| Ge     | 1.2    | <1.35  | 1.05   | 0.83   | 0.7    | 0.98    | 0.97   | <0.71  | 1      | 1.5    | 1.57   | 1.05   |
| As     | 5.1    | 36.4   | 25.0   | 13.0   | 12.1   | 1.6     | 4.7    | 4.8    | 5.1    | 9.3    | 8.7    | 9.6    |
| Rb     | 18.3   | 22.2   | 20.5   | 16.8   | 15.6   | 15.9    | 9.0    | 9.4    | 9.5    | 8.4    | 8.6    | 8.5    |
| Sr     | 441    | 339    | 353    | 409    | 431    | 318     | 535    | 561    | 542    | 527    | 527    | 524    |
| Y      | 6.5    | 5.0    | 6.7    | 6.3    | 6.5    | 5.9     | 6.8    | 7.2    | 7.1    | 7.1    | 7.2    | 7.1    |
| Zr     | 42.4   | 39.0   | 41.5   | 53.3   | 53.1   | 40.9    | 69.4   | 71.9   | 70.2   | 63.3   | 61.8   | 63.1   |
| Nb     | 1.30   | 1.32   | 1.72   | 1.75   | 1.81   | 1.47    | 2.02   | 2.23   | 2.17   | 2.00   | 2.04   | 1.86   |
| Mo     | 2.18   | 1.33   | 0.42   | 1.29   | 1.29   | 0.25    | 1.86   | 1.68   | 1.91   | 1.73   | 1.44   | 1.47   |
| Ag     | 0.41   | 0.66   | 0.43   | 0.60   | 0.55   | 0.49    | 0.55   | 0.58   | 0.46   | 7.90   | 7.49   | 7.55   |
| Cd     | <0.28  | <0.61  | <0.141 | <0.25  | <0.24  | <0.29   | <0.204 | <0.250 | <0.198 | <0.28  | <0.31  | <0.230 |
| In     | 0.39   | 0.29   | 0.09   | 1.47   | 1.66   | 0.01    | 0.60   | 0.65   | 0.58   | 3.82   | 3.82   | 3.89   |
| Sn     | 90     | 69     | 10     | 378    | 399    | 1       | 138    | 151    | 138    | 971    | 983    | 970    |
| Sb     | 348    | 141    | 56     | 994    | 1088   | 3       | 209    | 228    | 214    | 429    | 427    | 430    |
| Cs     | 0.391  | 0.595  | 0.529  | 0.209  | 0.179  | 0.219   | 0.136  | 0.152  | 0.137  | 0.116  | 0.136  | 0.127  |
| Ba     | 239    | 198    | 205    | 239    | 250    | 191     | 245    | 256    | 254    | 255    | 264    | 260    |
| La     | 6.560  | 5.620  | 6.260  | 6.480  | 6.530  | 5.910   | 7.260  | 7.260  | 7.320  | 7.280  | 7.100  | 6.910  |
| Ce     | 10.790 | 10.100 | 11.240 | 11.590 | 11.580 | 10.770  | 12.500 | 12.810 | 12.710 | 12.280 | 12.530 | 12.300 |
| Pr     | 1.437  | 1.070  | 1.354  | 1.488  | 1.457  | 1.329   | 1.563  | 1.710  | 1.661  | 1.583  | 1.613  | 1.596  |
| Nd     | 6.030  | 5.140  | 6.000  | 6.160  | 5.860  | 5.810   | 6.530  | 6.840  | 6.710  | 6.320  | 6.520  | 7.050  |
| Sm     | 1.210  | 1.510  | 1.380  | 1.230  | 1.390  | 1.200   | 1.240  | 1.480  | 1.350  | 1.300  | 1.540  | 1.480  |
| Eu     | 0.334  | 0.240  | 0.315  | 0.418  | 0.428  | 0.327   | 0.454  | 0.310  | 0.383  | 0.443  | 0.394  | 0.384  |
| Gd     | 1.230  | 1.150  | 1.130  | 1.200  | 1.170  | 1.070   | 1.340  | 1.350  | 1.170  | 1.190  | 1.190  | 1.300  |
| Tb     | 0.161  | 0.130  | 0.154  | 0.166  | 0.159  | 0.161   | 0.192  | 0.199  | 0.200  | 0.194  | 0.195  | 0.197  |
| Dy     | 1.151  | 0.850  | 0.952  | 1.085  | 1.097  | 0.959   | 1.230  | 1.240  | 1.067  | 1.176  | 1.220  | 1.123  |
| Ho     | 0.222  | 0.076  | 0.239  | 0.248  | 0.242  | 0.208   | 0.236  | 0.291  | 0.222  | 0.276  | 0.241  | 0.254  |
| Er     | 0.670  | 1.050  | 0.527  | 0.683  | 0.624  | 0.587   | 0.734  | 0.657  | 0.626  | 0.806  | 0.730  | 0.598  |
| Tm     | 0.085  | 0.046  | 0.082  | 0.092  | 0.101  | 0.084   | 0.090  | 0.110  | 0.097  | 0.090  | 0.105  | 0.093  |
| Yb     | 0.473  | 0.620  | 0.480  | 0.767  | 0.555  | 0.509   | 0.645  | 0.577  | 0.583  | 0.720  | 0.645  | 0.605  |
| Lu     | 0.096  | 0.063  | 0.088  | 0.061  | 0.088  | 0.081   | 0.095  | 0.109  | 0.083  | 0.100  | 0.072  | 0.110  |
| Hf     | 1.000  | 1.140  | 1.020  | 1.270  | 1.240  | 1.010   | 1.890  | 1.750  | 1.920  | 1.570  | 1.670  | 1.530  |
| Ta     | 0.087  | 0.059  | 0.117  | 0.109  | 0.129  | 0.086   | 0.147  | 0.158  | 0.118  | 0.122  | 0.105  | 0.102  |
| W      | 0.288  | 0.290  | 0.112  | 0.339  | 0.431  | 0.109   | 0.130  | 0.216  | 0.205  | 0.173  | 0.147  | 0.178  |
| Au     | 0.276  | 0.037  | 0.126  | 0.749  | 0.595  | 0.231   | 0.279  | 0.304  | 0.244  | 0.734  | 0.723  | 0.654  |
| Tl     | <0.00  | <0.00  | 0.005  | 0.014  | 0.004  | <0.0112 | 0.033  | 0.029  | 0.018  | 0.022  | 0.012  | 0.007  |
| Pb     | 938    | 349    | 355    | 1610   | 1642   | 599     | 506    | 534    | 486    | 6876   | 6897   | 6996   |
| Th     | 0.795  | 0.800  | 0.787  | 0.869  | 0.950  | 0.748   | 1.055  | 1.180  | 1.260  | 1.037  | 1.028  | 1.035  |
| U      | 0.733  | 1.720  | 1.490  | 0.860  | 1.080  | 1.390   | 1.130  | 1.100  | 0.990  | 0.900  | 1.020  | 1.040  |

(continued)

| Sample | SPC 40<br>decoration | SPC 40<br>decoration | SPC 40<br>decoration | SPC 17<br>Filament | SPC 39<br>Filament | SPC 39<br>Filament | SPC 39<br>Filament |
|--------|----------------------|----------------------|----------------------|--------------------|--------------------|--------------------|--------------------|
| Li     | 5.23                 | 4.64                 | 4.78                 | 3.97               | 6.17               | 6.01               | 5.2                |
| Be     | 0.35                 | 0.27                 | 0.43                 | 0.41               | 0.32               | 0.38               | 0.33               |
| B      | 122.4                | 122.4                | 122.8                | 124.4              | 140.4              | 148.4              | 148.5              |
| Sc     | 2.2                  | 2.1                  | 2.3                  | 1.8                | 2.5                | 2.3                | 2.3                |
| Ti     | 635                  | 642                  | 656                  | 490                | 751                | 735                | 743                |
| V      | 18                   | 18                   | 18                   | 11                 | 21                 | 21                 | 20                 |
| Cr     | 22                   | 24                   | 25                   | 18                 | 18                 | 18                 | 19                 |
| Co     | 31                   | 32                   | 35                   | 9                  | 10                 | 10                 | 11                 |
| Ni     | 21                   | 22                   | 24                   | 13                 | 16                 | 15                 | 16                 |
| Cu     | 837                  | 905                  | 871                  | 296                | 160                | 158                | 161                |
| Zn     | 147                  | 150                  | 147                  | 45                 | 39                 | 42                 | 40                 |
| Ga     | 2.8                  | 2.9                  | 3.1                  | 2.8                | 2.9                | 2.9                | 2.9                |
| Ge     | 0.68                 | 0.85                 | 0.75                 | 1.02               | 0.72               | 1.15               | 0.93               |
| As     | 28.6                 | 24.3                 | 16.6                 | 7.2                | 6.0                | 5.5                | 5.4                |
| Rb     | 9.1                  | 8.7                  | 8.7                  | 8.0                | 9.8                | 9.0                | 9.3                |
| Sr     | 507                  | 528                  | 514                  | 448                | 537                | 506                | 537                |
| Y      | 6.9                  | 7.1                  | 7.0                  | 6.4                | 7.0                | 6.6                | 7.1                |
| Zr     | 60.9                 | 61.9                 | 61.2                 | 49.1               | 70.7               | 64.9               | 69.8               |
| Nb     | 1.93                 | 1.93                 | 1.93                 | 1.54               | 2.09               | 1.98               | 2.18               |
| Mo     | 1.63                 | 1.64                 | 1.50                 | 0.93               | 1.77               | 1.85               | 1.70               |
| Ag     | 5.59                 | 6.15                 | 5.54                 | 2.45               | 0.48               | 0.64               | 0.53               |
| Cd     | <0.23                | <0.22                | <0.26                | 0.18               | <0.25              | 0.22               | <0.27              |
| In     | 3.57                 | 3.43                 | 3.62                 | 113.89             | 17.29              | 30.80              | 54.36              |
| Sn     | 895                  | 862                  | 917                  | 32430              | 4527               | 8570               | 15622              |
| Sb     | 4941                 | 3974                 | 2156                 | 186                | 197                | 205                | 206                |
| Cs     | 0.166                | 0.134                | 0.160                | 0.097              | 0.174              | 0.120              | 0.134              |
| Ba     | 248                  | 253                  | 253                  | 209                | 248                | 233                | 243                |
| La     | 7.070                | 7.040                | 7.260                | 6.160              | 7.240              | 6.870              | 7.370              |
| Ce     | 12.100               | 12.400               | 12.590               | 11.420             | 12.350             | 11.820             | 12.190             |
| Pr     | 1.569                | 1.533                | 1.486                | 1.357              | 1.592              | 1.535              | 1.602              |
| Nd     | 6.740                | 6.610                | 6.560                | 5.760              | 6.400              | 6.400              | 6.550              |
| Sm     | 1.350                | 1.390                | 1.310                | 1.280              | 1.350              | 1.180              | 1.460              |
| Eu     | 0.385                | 0.352                | 0.385                | 0.346              | 0.385              | 0.406              | 0.365              |
| Gd     | 1.280                | 1.310                | 1.400                | 0.920              | 1.030              | 1.010              | 1.270              |
| Tb     | 0.178                | 0.179                | 0.179                | 0.191              | 0.202              | 0.162              | 0.199              |
| Dy     | 1.147                | 1.137                | 1.180                | 0.949              | 1.056              | 1.174              | 1.119              |
| Ho     | 0.259                | 0.250                | 0.211                | 0.236              | 0.246              | 0.238              | 0.228              |
| Er     | 0.625                | 0.605                | 0.688                | 0.750              | 0.703              | 0.656              | 0.625              |
| Tm     | 0.078                | 0.100                | 0.104                | 0.088              | 0.103              | 0.082              | 0.101              |
| Yb     | 0.573                | 0.634                | 0.780                | 0.620              | 0.635              | 0.615              | 0.684              |
| Lu     | 0.081                | 0.114                | 0.083                | 0.066              | 0.119              | 0.081              | 0.083              |
| Hf     | 1.320                | 1.290                | 1.690                | 1.300              | 1.710              | 1.380              | 1.770              |
| Ta     | 0.119                | 0.103                | 0.125                | 0.106              | 0.153              | 0.118              | 0.110              |
| W      | 0.278                | 0.316                | 0.264                | 15.670             | 0.299              | 0.334              | 0.270              |
| Au     | 0.581                | 0.733                | 0.784                | 0.421              | 0.241              | 0.233              | 0.338              |
| Tl     | 0.033                | 0.058                | 0.024                | 0.005              | 0.013              | 0.007              | 0.018              |
| Pb     | 6120                 | 6410                 | 6284                 | 30142              | 4563               | 5117               | 5820               |
| Th     | 1.021                | 1.024                | 1.154                | 0.859              | 1.075              | 0.998              | 1.059              |
| U      | 0.880                | 0.950                | 0.950                | 0.930              | 0.960              | 1.060              | 1.090              |
